# Supplementary material for: In silico analyses for potential key genes associated with gastric cancer
Source: PeerJ. 2018 Dec 7;6:e6092. doi: 10.7717/peerj.6092 (PMC6287586; doi:10.7717/peerj.6092)
Supplement: Supplemental Information 1 [file peerj-06-6092-s001.xlsx]

## Sheet: Sheet1
ID	adj.P.Val	P.Value	t	B	logFC	Gene.symbol	Gene.title
2037	1.52e-18	6.56e-23	-18.8578	41.4277	-6.1737	MUC5AC	mucin 5AC, oligomeric mucus/gel-forming
369068	2.97e-17	1.93e-21	-15.6348	38.354	-3.70528	MT1E	metallothionein 1E
22078	7.37e-17	6.37e-21	-15.0569	37.2056	-2.32482	RPL11	ribosomal protein L11
352087	1.43e-16	1.54e-20	-15.7564	36.3201	-2.12863	HEATR3	HEAT repeat containing 3
225044	4.49e-16	6.79e-20	-15.7809	34.873	-2.7148	PSENEN	presenilin enhancer gamma-secretase subunit
408103	2.41e-15	4.17e-19	-14.3382	33.1251	-4.93623	HIST1H4C	histone cluster 1, H4c
13033	4.06e-15	7.9e-19	-13.4473	32.5342	-2.92953	MIF	macrophage migration inhibitory factor (glycosylation-inhibiting factor)
350019	2.08e-14	4.94e-18	-12.9696	30.7533	-3.0512	SMG1P5	SMG1P5, nonsense mediated mRNA decay associated PI3K related kinase pseudogene 5
109070	4.26e-14	1.1e-17	12.6099	29.9664	2.11066	KCMF1	potassium channel modulatory factor 1
235035	9.54e-14	2.68e-17	12.6432	29.0974	1.66322	IL19	interleukin 19
103080	1.16e-13	3.49e-17	-12.7871	28.8647	-2.72791	FICD	FIC domain containing
269013	1.23e-13	4e-17	12.2113	28.7105	2.88826	RPL37///RPL37	ribosomal protein L37///ribosomal protein L37
205004	2.18e-13	8e-17	-12.8855	28.0695	-1.44673	DICER1	dicer 1, ribonuclease III
6072	2.3e-13	9.03e-17	11.9623	27.9148	3.18678	COL4A1	collagen type IV alpha 1 chain
192003	2.3e-13	9.45e-17	-12.9658	27.9108	-1.63794	ZFAND6	zinc finger AN1-type containing 6
153110	2.43e-13	1.05e-16	-12.1019	27.7794	-3.42623	SNHG5	small nucleolar RNA host gene 5
431023	5.18e-13	2.46e-16	12.0297	26.9264	2.21983	COL4A2	collagen type IV alpha 2 chain
182023	5.27e-13	2.62e-16	11.6403	26.8738	2.84406	TCEAL4	transcription elongation factor A like 4
136048	7.46e-13	4.03e-16	11.6821	26.454	2.20572	PCM1	pericentriolar material 1
264085	8.21e-13	4.61e-16	-15.1376	26.2819	-2.54247	CBX5	chromobox 5
17003	2.33e-12	1.46e-15	11.1287	25.1912	1.76031	MARS	methionyl-tRNA synthetase
479006	4.54e-12	3.04e-15	10.9136	24.4735	2.13858	VIM///ZYX///SH3GL1	vimentin///zyxin///SH3 domain containing GRB2 like 1, endophilin A2
6086	5.24e-12	3.63e-15	11.1761	24.3302	3.0976	IGFBP7///TLCD1	insulin like growth factor binding protein 7///TLC domain containing 1
300086	6.67e-12	4.76e-15	-10.7828	24.0342	-1.30006	IKZF4	IKAROS family zinc finger 4
232086	7.14e-12	5.25e-15	10.7542	23.9377	1.55642	TAOK3	TAO kinase 3
164084	7.97e-12	6.02e-15	-11.2905	23.8562	-2.05549	TLK1	tousled like kinase 1
195087	1.07e-11	9.27e-15	10.5893	23.3799	3.34719	IGFBP5	insulin like growth factor binding protein 5
296104	1.39e-11	1.23e-14	10.507	23.1005	2.01826	RPL37A///UBN2	ribosomal protein L37a///ubinuclein 2
367059	1.54e-11	1.4e-14	-10.9254	23.0246	-2.37012	ASAP2	ArfGAP with SH3 domain, ankyrin repeat and PH domain 2
499023	1.59e-11	1.49e-14	10.4523	22.914	2.31394	ARID5B	AT-rich interaction domain 5B
354061	1.74e-11	1.69e-14	-10.6236	22.8135	-2.0645	ABCC3	ATP binding cassette subfamily C member 3
130111	1.9e-11	1.89e-14	10.4494	22.6859	2.25471	LTBP2	latent transforming growth factor beta binding protein 2
266076	1.91e-11	1.94e-14	-10.5109	22.6728	-1.85858	ZNHIT1	zinc finger HIT-type containing 1
72065	2.15e-11	2.23e-14	10.3371	22.5207	3.70458	RGS1	regulator of G-protein signaling 1
106065	3.1e-11	3.28e-14	-10.656	22.1908	-1.73584	BCL7C	BCL tumor suppressor 7C
19087	4.38e-11	4.82e-14	-11.9564	21.9022	-2.92851	PLEKHB2	pleckstrin homology domain containing B2
229006	3.93e-11	4.25e-14	10.1523	21.8858	2.85145	CBWD3///CBWD5///CBWD2///CBWD1	COBW domain containing 3///COBW domain containing 5///COBW domain containing 2///COBW domain containing 1
313021	4.77e-11	5.36e-14	10.0861	21.6576	1.76172	ATRX	ATRX, chromatin remodeler
392036	4.81e-11	5.5e-14	10.0786	21.6318	1.34922	RPS24///AGPAT2	ribosomal protein S24///1-acylglycerol-3-phosphate O-acyltransferase 2
441033	5.32e-11	6.2e-14	10.3052	21.5415	1.77306	PRMT2	protein arginine methyltransferase 2
114058	6.58e-11	7.96e-14	-10.3024	21.3129	-2.18703	IFI6	interferon alpha inducible protein 6
276068	6.88e-11	8.47e-14	-10.3592	21.261	-1.70343	TSTD1	thiosulfate sulfurtransferase like domain containing 1
243081	8.15e-11	1.04e-13	9.9571	21.0171	1.97931	MFHAS1	malignant fibrous histiocytoma amplified sequence 1
100021	8.68e-11	1.13e-13	9.87611	20.9298	2.42649	KARS	lysyl-tRNA synthetase
325074	9.85e-11	1.3e-13	-13.7241	20.86	-2.15199	KIAA1143	KIAA1143
240027	1.65e-10	2.24e-13	-10.5755	20.3649	-2.16399	SNRPN	small nuclear ribonucleoprotein polypeptide N
492028	1.66e-10	2.3e-13	9.84928	20.2552	1.40444	NOD1	nucleotide binding oligomerization domain containing 1
355105	1.9e-10	2.75e-13	9.79693	20.0756	4.34974	RGS1	regulator of G-protein signaling 1
146009	1.97e-10	2.99e-13	9.60091	19.9685	1.8936	PCMTD2	protein-L-isoaspartate (D-aspartate) O-methyltransferase domain containing 2
190044	1.97e-10	3.02e-13	-9.59829	19.9593	-1.41602	C9orf16	chromosome 9 open reading frame 16
397056	2.04e-10	3.17e-13	9.58503	19.9128	1.36499	PPIG	peptidylprolyl isomerase G
4083	2.1e-10	3.31e-13	9.68284	19.8862	1.88348	KIF21A	kinesin family member 21A
373048	2.35e-10	3.81e-13	9.53317	19.7306	1.92296	NFYB	nuclear transcription factor Y subunit beta
372031	2.9e-10	4.88e-13	-9.68972	19.5242	-1.27911	GSTO1	glutathione S-transferase omega 1
293069	2.93e-10	5.06e-13	-9.80917	19.508	-1.9476	LOC102546299	uncharacterized LOC102546299
127047	2.93e-10	5.01e-13	9.45692	19.4622	1.72907	UBC///METRNL	ubiquitin C///meteorin like, glial cell differentiation regulator
334043	3.01e-10	5.27e-13	9.44284	19.4126	1.94015	DHX58	DEXH-box helicase 58
86026	3.17e-10	5.62e-13	9.58841	19.3791	1.56593	ZCCHC17	zinc finger CCHC-type containing 17
457021	3.91e-10	7.1e-13	9.36006	19.1204	2.84807	CTGF	connective tissue growth factor
157092	5.05e-10	9.38e-13	9.38491	18.8639	1.5058	AGPAT1	1-acylglycerol-3-phosphate O-acyltransferase 1
202010	5.48e-10	1.05e-12	-9.65303	18.7975	-2.34007	POLR2E	RNA polymerase II subunit E
189004	5.61e-10	1.09e-12	9.45309	18.7366	1.71341	LOC105369155///LRRC29	uncharacterized LOC105369155///leucine rich repeat containing 29
59072	6.1e-10	1.2e-12	9.2145	18.605	1.43159	NCOA1	nuclear receptor coactivator 1
236052	6.66e-10	1.32e-12	-9.23602	18.5171	-2.85696	TAX1BP3	Tax1 binding protein 3
75006	7.39e-10	1.49e-12	-9.363	18.4312	-1.13603	MRPL30	mitochondrial ribosomal protein L30
19031	7.47e-10	1.53e-12	9.14634	18.3629	1.75186	HLA-E	major histocompatibility complex, class I, E
21033	7.74e-10	1.61e-12	9.13361	18.3177	1.64757	NOMO3///NOMO2///NOMO1	NODAL modulator 3///NODAL modulator 2///NODAL modulator 1
114076	7.95e-10	1.67e-12	9.12331	18.281	2.26352	TALDO1///TALDO1	transaldolase 1///transaldolase 1
16014	8.28e-10	1.75e-12	9.1094	18.2315	1.38859	BCLAF1	BCL2 associated transcription factor 1
18112	9.26e-10	2.1e-12	-10.2078	18.2201	-3.38278	HIST1H4D	histone cluster 1, H4d
404080	9.36e-10	2.14e-12	9.0539	18.0339	1.4811	SMARCA5	SWI/SNF related, matrix associated, actin dependent regulator of chromatin, subfamily a, member 5
205009	9.38e-10	2.17e-12	9.05068	18.0224	1.62702	PHIP	pleckstrin homology domain interacting protein
273110	1.01e-09	2.39e-12	9.46904	18.0078	1.47201	CD300C	CD300c molecule
140078	9.93e-10	2.32e-12	9.03246	17.9575	2.10941	MS4A6A	membrane spanning 4-domains A6A
189082	1.04e-09	2.5e-12	9.10728	17.9118	2.00926	FTSJ3	FtsJ homolog 3
457087	1.06e-09	2.57e-12	9.04988	17.8686	1.82333	TRIP12	thyroid hormone receptor interactor 12
22064	1.1e-09	2.67e-12	8.99298	17.8166	1.56012	CSNK2B///CSNK2B	casein kinase 2 beta///casein kinase 2 beta
177052	1.12e-09	2.78e-12	8.98234	17.7786	2.01915	RPL26	ribosomal protein L26
258022	1.17e-09	2.92e-12	9.06264	17.757	2.80539	PDPN	podoplanin
445004	1.23e-09	3.14e-12	8.94899	17.6595	1.32847	PPP2CA	protein phosphatase 2 catalytic subunit alpha
56055	1.33e-09	3.41e-12	9.12129	17.6244	1.59965	THG1L	tRNA-histidine guanylyltransferase 1 like
459041	1.58e-09	4.14e-12	-9.67423	17.5216	-1.57192	SUMF2	sulfatase modifying factor 2
20105	1.47e-09	3.82e-12	8.9874	17.491	2.22791	KCP	kielin/chordin-like protein
90078	1.63e-09	4.31e-12	-9.42339	17.4473	-2.04519	ZDHHC12	zinc finger DHHC-type containing 12
34013	1.76e-09	4.72e-12	8.83666	17.2576	2.29439	NPM1///NPM1	nucleophosmin///nucleophosmin
260046	1.99e-09	5.63e-12	9.20506	17.1696	1.4947	ELAVL1	ELAV like RNA binding protein 1
202040	1.99e-09	5.6e-12	8.78964	17.089	2.36692	DNAJA1	DnaJ heat shock protein family (Hsp40) member A1
30058	2.12e-09	6.05e-12	8.95568	17.062	1.73802	BMS1	BMS1, ribosome biogenesis factor
419043	2.5e-09	7.51e-12	-10.5028	17.0423	-1.43252	PDK3	pyruvate dehydrogenase kinase 3
291069	2.49e-09	7.42e-12	-9.75135	16.9845	-1.54842	REPS1	RALBP1 associated Eps domain containing 1
196045	2.36e-09	6.87e-12	8.77709	16.9054	1.94034	TRIM8	tripartite motif containing 8
177011	2.36e-09	6.85e-12	8.7345	16.8911	1.4884	MDH2	malate dehydrogenase 2
227059	2.54e-09	7.74e-12	-9.17104	16.8627	-1.67979	NR1D2	nuclear receptor subfamily 1 group D member 2
15087	2.44e-09	7.16e-12	8.72253	16.8481	2.77659	C4B///C4A	complement component 4B (Chido blood group)///complement component 4A (Rodgers blood group)
351065	2.84e-09	8.85e-12	-9.79096	16.8264	-1.59641	DHRS4-AS1	DHRS4 antisense RNA 1
67069	2.49e-09	7.4e-12	8.7565	16.8253	1.91379	LUC7L3	LUC7 like 3 pre-mRNA splicing factor
184023	2.5e-09	7.56e-12	8.70767	16.7947	2.69574	ZFP36L2	ZFP36 ring finger protein like 2
408019	2.77e-09	8.55e-12	8.67397	16.6735	1.90023	ENG///CLIP2	endoglin///CAP-Gly domain containing linker protein 2
94026	2.99e-09	9.38e-12	-8.64881	16.583	-1.04763	CD79A	CD79a molecule
369015	3.1e-09	9.79e-12	8.72287	16.5664	1.78491	KIRREL	kin of IRRE like (Drosophila)
380031	3.79e-09	1.31e-11	-10.5971	16.5204	-2.09015	NBR1	NBR1, autophagy cargo receptor
100085	3.45e-09	1.12e-11	-9.12006	16.5067	-1.22963	HARBI1	harbinger transposase derived 1
21005	3.29e-09	1.05e-11	8.61715	16.469	2.3591	LGALS1	galectin 1
156026	3.42e-09	1.1e-11	8.60513	16.4258	2.52248	KLF10///KLF10	Kruppel like factor 10///Kruppel like factor 10
492111	3.51e-09	1.15e-11	8.63392	16.3973	2.82915	COL6A3///NAA60	collagen type VI alpha 3 chain///N(alpha)-acetyltransferase 60, NatF catalytic subunit
79042	3.78e-09	1.27e-11	8.8447	16.3561	1.89613	GPN1	GPN-loop GTPase 1
440086	4.01e-09	1.4e-11	-9.43297	16.3508	-1.54642	TAF8	TATA-box binding protein associated factor 8
319055	3.71e-09	1.23e-11	8.57575	16.3199	1.37494	CDV3	CDV3 homolog
269092	3.79e-09	1.31e-11	8.73312	16.31	3.47593	FCGR3B///FCGR3A///FCGR3B	Fc fragment of IgG receptor IIIb///Fc fragment of IgG receptor IIIa///Fc fragment of IgG receptor IIIb
30100	3.78e-09	1.26e-11	8.56855	16.2939	1.89055	RBPJ	recombination signal binding protein for immunoglobulin kappa J region
451061	3.79e-09	1.3e-11	-8.68872	16.2907	-1.32389	TMEM160	transmembrane protein 160
439070	3.79e-09	1.3e-11	-8.60101	16.2722	-1.59109	SLC1A7	solute carrier family 1 member 7
241015	3.79e-09	1.29e-11	8.56219	16.271	1.7534	AK6	adenylate kinase 6
196101	3.8e-09	1.32e-11	8.55535	16.2464	1.79693	IARS2	isoleucyl-tRNA synthetase 2, mitochondrial
355045	4.33e-09	1.55e-11	-8.95553	16.1789	-2.64023	NME3	NME/NM23 nucleoside diphosphate kinase 3
311073	4.11e-09	1.45e-11	-8.53002	16.155	-1.01161	UGCG	UDP-glucose ceramide glucosyltransferase
99062	4.14e-09	1.47e-11	8.5267	16.143	1.88732	LAMB1	laminin subunit beta 1
174072	4.69e-09	1.72e-11	8.75429	16.044	1.21076	NCBP3	nuclear cap binding subunit 3
186073	4.6e-09	1.66e-11	-8.57529	16.0398	-1.38931	DNAJC16	DnaJ heat shock protein family (Hsp40) member C16
124030	4.77e-09	1.78e-11	-8.85346	16.0312	-1.17021	RNF219	ring finger protein 219
272072	4.87e-09	1.84e-11	-8.90274	16.0106	-1.54828	TNRC6B	trinucleotide repeat containing 6B
114015	4.68e-09	1.7e-11	8.48669	15.9986	1.4005	2018-09-09	septin 9
187091	4.69e-09	1.71e-11	8.4842	15.9896	1.36364	NRDC	nardilysin convertase
344080	4.77e-09	1.78e-11	8.51357	15.9688	1.96442	PTPN6	protein tyrosine phosphatase, non-receptor type 6
460039	4.77e-09	1.77e-11	8.47586	15.9595	2.30264	RACK1	receptor for activated C kinase 1
117074	4.81e-09	1.81e-11	8.46953	15.9366	1.77934	MLKL	mixed lineage kinase domain like
199078	5.68e-09	2.19e-11	-9.04587	15.8783	-1.0265	OR7A5	olfactory receptor family 7 subfamily A member 5
421023	5.36e-09	2.05e-11	-8.65295	15.8622	-2.46441	TMEM238	transmembrane protein 238
473026	5.78e-09	2.25e-11	-8.78333	15.8036	-2.03376	TBC1D8B	TBC1 domain family member 8B
57035	5.85e-09	2.31e-11	8.5708	15.7334	1.35013	ANXA11	annexin A11
309049	5.84e-09	2.29e-11	8.40489	15.703	1.69349	EIF3F	eukaryotic translation initiation factor 3 subunit F
319049	5.86e-09	2.34e-11	8.39918	15.6823	1.96385	C19orf53	chromosome 19 open reading frame 53
393108	6.5e-09	2.63e-11	-8.49003	15.5985	-1.62025	RERE	arginine-glutamic acid dipeptide repeats
82050	6.59e-09	2.69e-11	8.36132	15.5453	1.66368	CCDC71L	coiled-coil domain containing 71-like
117110	6.59e-09	2.7e-11	8.36027	15.5415	1.30464	RSRP1	arginine and serine rich protein 1
10034	7.03e-09	2.93e-11	8.33843	15.4624	1.3056	TARS	threonyl-tRNA synthetase
144091	7.03e-09	2.93e-11	8.33842	15.4624	2.4299	CALM1	calmodulin 1
483060	7.45e-09	3.14e-11	8.31986	15.3952	1.9254	FRG1///FRG1CP///FRG1BP///MLLT10P1	FSHD region gene 1///FSHD region gene 1 family member C, pseudogene///FSHD region gene 1 family member B, pseudogene///myeloid/lymphoid or mixed-lineage leukemia; translocated to, 10 pseudogene 1
313104	7.66e-09	3.26e-11	8.30944	15.3574	2.08	SLC15A3	solute carrier family 15 member 3
353073	8.56e-09	3.69e-11	8.3534	15.2556	1.7138	PHF10	PHD finger protein 10
145105	8.56e-09	3.7e-11	8.27516	15.2332	2.43925	COL1A2	collagen type I alpha 2 chain
487062	8.77e-09	3.81e-11	8.38546	15.2329	1.40714	RHOQ	ras homolog family member Q
452096	9.22e-09	4.02e-11	8.25238	15.1506	2.2487	ETS2	ETS proto-oncogene 2, transcription factor
28039	9.22e-09	4.06e-11	8.24978	15.1412	2.16475	IVNS1ABP	influenza virus NS1A binding protein
464068	1.05e-08	4.84e-11	-8.85817	15.1106	-1.4175	CORO2A	coronin 2A
437092	1.12e-08	5.38e-11	-9.3363	15.0889	-1.14104	MFSD10	major facilitator superfamily domain containing 10
492030	9.76e-09	4.34e-11	8.26898	15.085	2.1937	SERPING1	serpin family G member 1
384071	9.79e-09	4.4e-11	8.22854	15.0641	1.97445	CLTA	clathrin light chain A
224056	1.06e-08	4.9e-11	-8.60298	15.0491	-1.94528	CDK13	cyclin dependent kinase 13
38105	1.01e-08	4.6e-11	8.25315	15.0282	1.6937	PLAT	plasminogen activator, tissue type
116019	1.07e-08	4.97e-11	8.39747	15.0079	1.77075	PNISR	PNN interacting serine and arginine rich protein
319039	1.02e-08	4.69e-11	8.21078	14.9997	1.68483	IPO5	importin 5
247019	1.07e-08	4.97e-11	8.35277	14.9973	1.62446	LIPT1	lipoyltransferase 1
81071	1.08e-08	5.09e-11	8.18888	14.9201	1.1684	SENP6	SUMO1/sentrin specific peptidase 6
206105	1.08e-08	5.11e-11	8.18775	14.916	1.4614	BAZ2A///BAZ2A	bromodomain adjacent to zinc finger domain 2A///bromodomain adjacent to zinc finger domain 2A
134089	1.08e-08	5.15e-11	8.18541	14.9076	2.03966	UTP14A///ALG11///UTP14C	UTP14A small subunit processome component///ALG11, alpha-1,2-mannosyltransferase///UTP14, small subunit processome component homolog C (S. cerevisiae)
405018	1.12e-08	5.42e-11	8.28664	14.8958	1.68975	SNORD116@///SNRPN///IPW	small nucleolar RNA, C/D box 116 cluster///small nuclear ribonucleoprotein polypeptide N///imprinted in Prader-Willi syndrome (non-protein coding)
202110	1.11e-08	5.29e-11	8.17854	14.8826	3.01316	TPM2///SETDB1	tropomyosin 2 (beta)///SET domain bifurcated 1
11010	1.19e-08	5.79e-11	8.44751	14.8764	1.49551	GPBP1	GC-rich promoter binding protein 1
407032	1.2e-08	5.96e-11	8.34524	14.837	2.41219	GNB4	G protein subunit beta 4
109084	1.19e-08	5.85e-11	8.18753	14.7925	0.989607	SPHK2	sphingosine kinase 2
238095	1.21e-08	6.11e-11	-8.33793	14.7883	-1.42804	KDM2A	lysine demethylase 2A
82001	1.22e-08	6.19e-11	8.13568	14.7269	1.33624	KANSL2	KAT8 regulatory NSL complex subunit 2
194025	1.24e-08	6.34e-11	8.12934	14.7039	1.98879	RAP1A	RAP1A, member of RAS oncogene family
431010	1.3e-08	6.7e-11	8.15013	14.6581	1.13875	CHMP7	charged multivesicular body protein 7
81101	1.33e-08	6.91e-11	8.10596	14.6189	1.4558	ZNF394	zinc finger protein 394
476001	1.35e-08	7.04e-11	8.10099	14.6008	1.86655	KRR1	KRR1, small subunit processome component homolog
224062	1.46e-08	7.74e-11	-8.46405	14.6001	-1.19915	MON2	MON2 homolog, regulator of endosome-to-Golgi trafficking
414025	1.36e-08	7.13e-11	8.09747	14.588	2.00051	LARP7	La ribonucleoprotein domain family member 7
61100	1.38e-08	7.3e-11	8.09134	14.5657	1.60644	RPL5///POLB	ribosomal protein L5///DNA polymerase beta
383036	1.73e-08	9.28e-11	8.3085	14.4214	2.46049	ISCA1	iron-sulfur cluster assembly 1
75068	1.65e-08	8.78e-11	8.04127	14.3836	1.5117	DDX54	DEAD-box helicase 54
100025	1.67e-08	8.93e-11	8.03661	14.3666	1.32373	EIF3M	eukaryotic translation initiation factor 3 subunit M
154095	1.8e-08	9.79e-11	-8.34166	14.3581	-2.03801	STX16	syntaxin 16
25089	1.79e-08	9.65e-11	8.01593	14.2914	2.15232	GABARAP	GABA type A receptor-associated protein
33095	1.89e-08	1.03e-10	8.06878	14.2549	1.55698	FAM162B	family with sequence similarity 162 member B
48057	2.05e-08	1.13e-10	8.12117	14.2049	2.14799	RBM15///RBM15	RNA binding motif protein 15///RNA binding motif protein 15
37047	2.06e-08	1.14e-10	7.97163	14.1301	1.94297	PSMB7	proteasome subunit beta 7
121046	2.1e-08	1.16e-10	7.96566	14.1083	1.60643	HSPA4	heat shock protein family A (Hsp70) member 4
198111	2.33e-08	1.32e-10	8.20592	14.0801	1.51925	CEL	carboxyl ester lipase
58080	2.25e-08	1.26e-10	7.94359	14.0279	1.75847	C2	complement component 2
389038	2.32e-08	1.3e-10	7.93456	13.995	1.77545	MRGPRX3	MAS related GPR family member X3
118040	2.35e-08	1.35e-10	7.95983	13.9729	1.6845	BECN1	beclin 1
120004	2.35e-08	1.35e-10	7.92603	13.9639	2.36969	TUBB6	tubulin beta 6 class V
37072	2.35e-08	1.35e-10	7.92506	13.9604	1.50655	RFX5	regulatory factor X5
481101	2.41e-08	1.39e-10	7.91758	13.9331	1.24553	ZNF7	zinc finger protein 7
160059	2.49e-08	1.44e-10	-7.94091	13.9046	-2.17613	UGDH	UDP-glucose 6-dehydrogenase
279068	3.27e-08	2.04e-10	-11.1028	13.8441	-1.91619	DNAJC7	DnaJ heat shock protein family (Hsp40) member C7
104016	2.62e-08	1.54e-10	7.89042	13.8341	2.05697	SRP14	signal recognition particle 14
394031	2.69e-08	1.59e-10	7.94859	13.8269	1.53486	CCDC88A	coiled-coil domain containing 88A
19058	3.16e-08	1.95e-10	-8.61153	13.7822	-1.83525	SUGP2	SURP and G-patch domain containing 2
95094	2.95e-08	1.79e-10	7.9172	13.715	2.13817	ALKBH7	alkB homolog 7
415009	3.29e-08	2.07e-10	-8.45144	13.6968	-1.68173	ARRDC1	arrestin domain containing 1
313030	3.56e-08	2.32e-10	8.7105	13.6429	2.65902	SULF2	sulfatase 2
35112	3.19e-08	1.98e-10	7.88913	13.6149	2.06243	SRGAP2C	SLIT-ROBO Rho GTPase activating protein 2C
163091	3.13e-08	1.93e-10	7.82902	13.6101	1.34807	FLII	FLII, actin remodeling protein
494111	3.4e-08	2.2e-10	8.05581	13.5701	1.89675	NID2	nidogen 2
366092	3.29e-08	2.07e-10	7.84251	13.5612	1.93016	TOX4///TOX4	TOX high mobility group box family member 4///TOX high mobility group box family member 4
185036	3.38e-08	2.17e-10	7.9365	13.5431	1.91379	LPIN2	lipin 2
205089	3.31e-08	2.09e-10	-7.80753	13.5317	-1.33042	LINC01119	long intergenic non-protein coding RNA 1119
308012	3.32e-08	2.1e-10	7.80609	13.5265	1.99782	CAV2	caveolin 2
19063	3.32e-08	2.11e-10	7.8044	13.5203	2.17381	GPX4	glutathione peroxidase 4
99072	3.38e-08	2.17e-10	7.7978	13.4962	1.11717	NARF	nuclear prelamin A recognition factor
17112	3.4e-08	2.19e-10	7.7948	13.4852	1.95362	RGCC	regulator of cell cycle
114063	3.49e-08	2.27e-10	7.85184	13.4703	1.76942	TMSB10	thymosin beta 10
115071	3.61e-08	2.36e-10	7.8403	13.4524	1.66524	RRAGC	Ras related GTP binding C
457006	3.56e-08	2.32e-10	7.77972	13.4302	1.82572	TIE1	tyrosine kinase with immunoglobulin like and EGF like domains 1
236025	3.64e-08	2.39e-10	7.77093	13.3981	2.17828	COL3A1///SERPINF1	collagen type III alpha 1 chain///serpin family F member 1
242005	3.66e-08	2.42e-10	7.76828	13.3884	2.69325	THY1	Thy-1 cell surface antigen
353029	3.66e-08	2.42e-10	-7.76768	13.3862	-1.20531	POU5F1P3///POU5F1	POU class 5 homeobox 1 pseudogene 3///POU class 5 homeobox 1
235089	4.07e-08	2.71e-10	7.912	13.3641	1.98865	PXDN	peroxidasin
128089	3.97e-08	2.63e-10	7.74509	13.3037	1.91727	ISCU	iron-sulfur cluster assembly enzyme
17069	4.13e-08	2.76e-10	7.73253	13.2579	1.58172	ZHX1-C8orf76///C8orf76	ZHX1-C8orf76 readthrough///chromosome 8 open reading frame 76
157067	4.96e-08	3.44e-10	-8.49335	13.2414	-1.9359	TAF15	TATA-box binding protein associated factor 15
80110	4.76e-08	3.26e-10	-8.24234	13.2375	-1.63681	CCT3	chaperonin containing TCP1 subunit 3
120052	4.23e-08	2.83e-10	7.72551	13.2322	1.50875	TIMM9	translocase of inner mitochondrial membrane 9
266044	4.37e-08	2.93e-10	-7.71602	13.1975	-1.09037	DLX4	distal-less homeobox 4
402062	4.48e-08	3.03e-10	7.7392	13.1883	1.75569	FARP1///FARP1	FERM, ARH/RhoGEF and pleckstrin domain protein 1///FERM, ARH/RhoGEF and pleckstrin domain protein 1
393101	4.54e-08	3.09e-10	-7.80111	13.1754	-2.09105	HACD3	3-hydroxyacyl-CoA dehydratase 3
403027	4.54e-08	3.08e-10	7.73449	13.1591	1.84006	NOTCH1	notch 1
458007	4.85e-08	3.35e-10	7.71162	13.0887	1.83342	TMEM248	transmembrane protein 248
156036	5.18e-08	3.63e-10	7.82927	13.0483	1.83327	HCCS	holocytochrome c synthase
33033	5.87e-08	4.31e-10	-8.49274	13.035	-1.34707	AGBL5	ATP/GTP binding protein like 5
8080	4.98e-08	3.46e-10	7.67145	13.0347	2.60138	PLAU///PLAU	plasminogen activator, urokinase///plasminogen activator, urokinase
117005	5.56e-08	4.01e-10	-8.06642	13.0078	-2.28602	SNHG16	small nucleolar RNA host gene 16
158062	5.3e-08	3.72e-10	-7.65205	12.9638	-1.02053	THADA	THADA, armadillo repeat containing
326069	5.48e-08	3.89e-10	7.77207	12.9574	1.13537	PDE6G	phosphodiesterase 6G
58025	5.52e-08	3.94e-10	7.66773	12.9301	2.70065	DUSP5	dual specificity phosphatase 5
102004	5.47e-08	3.87e-10	7.64154	12.9254	2.15363	THEMIS2///THEMIS2	thymocyte selection associated family member 2///thymocyte selection associated family member 2
109039	5.56e-08	4.03e-10	7.69386	12.9051	1.25368	FAM189B	family with sequence similarity 189 member B
309101	5.54e-08	3.96e-10	7.63521	12.9022	1.68493	TERF2IP	TERF2 interacting protein
243004	5.56e-08	3.99e-10	7.63329	12.8952	0.956946	GNPTG	N-acetylglucosamine-1-phosphate transferase gamma subunit
422016	5.74e-08	4.19e-10	-7.6828	12.8655	-1.60374	LINC01301	long intergenic non-protein coding RNA 1301
67005	6e-08	4.43e-10	7.77247	12.8634	1.71679	PSMD5-AS1	PSMD5 antisense RNA 1 (head to head)
151034	6e-08	4.44e-10	7.66723	12.8097	1.17741	ZNF16	zinc finger protein 16
397104	6.03e-08	4.49e-10	7.63212	12.7886	1.72155	PARD3	par-3 family cell polarity regulator
431108	6.03e-08	4.49e-10	7.63208	12.7885	1.2611	SNX18	sorting nexin 18
117019	6.03e-08	4.5e-10	-7.60086	12.7766	-1.30484	STARD4	StAR related lipid transfer domain containing 4
380090	6.03e-08	4.51e-10	7.60066	12.7759	1.33319	FTH1	ferritin heavy chain 1
185008	6.1e-08	4.57e-10	7.59672	12.7615	1.1592	RUBCN	RUN and cysteine rich domain containing beclin 1 interacting protein
370101	6.87e-08	5.24e-10	7.7249	12.7107	1.63418	RNF31	ring finger protein 31
282002	6.44e-08	4.84e-10	7.58134	12.7053	1.70712	PSMD10	proteasome 26S subunit, non-ATPase 10
14075	6.46e-08	4.87e-10	7.57974	12.6994	1.00685	DHX36	DEAH-box helicase 36
408028	6.77e-08	5.13e-10	7.69464	12.6861	1.42939	PIK3R5	phosphoinositide-3-kinase regulatory subunit 5
69072	7.17e-08	5.51e-10	-7.91936	12.682	-1.28481	ATP5H	ATP synthase, H+ transporting, mitochondrial Fo complex subunit D
56027	6.71e-08	5.08e-10	7.63019	12.677	1.64705	SREK1IP1	SREK1 interacting protein 1
328041	6.98e-08	5.34e-10	-7.75717	12.6675	-1.67276	LMAN2	lectin, mannose binding 2
450001	7.26e-08	5.62e-10	7.60253	12.6036	1.3326	LRRC8C	leucine rich repeat containing 8 family member C
285018	7.25e-08	5.59e-10	7.57271	12.5735	1.75567	UBA2	ubiquitin like modifier activating enzyme 2
201103	7.32e-08	5.69e-10	-7.59895	12.565	-1.55294	MED1	mediator complex subunit 1
247090	8.34e-08	6.72e-10	-8.06908	12.5399	-1.48942	ILVBL	ilvB acetolactate synthase like
60038	7.38e-08	5.76e-10	7.53497	12.5356	1.65516	COPRS	coordinator of PRMT5 and differentiation stimulator
477018	7.57e-08	5.99e-10	7.65135	12.5343	1.49528	MYO9A	myosin IXA
350086	7.57e-08	5.99e-10	7.554	12.5188	2.43393	SERPINF1	serpin family F member 1
326075	7.47e-08	5.86e-10	7.53013	12.5179	1.79998	CCT8	chaperonin containing TCP1 subunit 8
445013	8.75e-08	7.11e-10	7.63825	12.4117	1.83518	FBXO11	F-box protein 11
478031	8.55e-08	6.91e-10	-7.61116	12.3932	-1.63121	SRGAP1	SLIT-ROBO Rho GTPase activating protein 1
408111	8.29e-08	6.66e-10	7.49567	12.3919	2.0945	COL4A2	collagen type IV alpha 2 chain
2034	8.74e-08	7.08e-10	7.47931	12.332	1.27371	RPL7	ribosomal protein L7
486068	9.22e-08	7.57e-10	7.55236	12.3062	1.43721	TMEM173	transmembrane protein 173
476065	9.33e-08	7.68e-10	7.5816	12.2894	1.33803	EXT1	exostosin glycosyltransferase 1
30005	1.06e-07	8.77e-10	7.54443	12.1713	1.27829	TBCE	tubulin folding cofactor E
146028	1.11e-07	9.25e-10	-7.71894	12.1616	-1.52631	C1orf132	chromosome 1 open reading frame 132
375057	1.28e-07	1.1e-09	8.32302	12.15	1.89606	GNL3	G protein nucleolar 3
108076	1.09e-07	9.11e-10	7.41174	12.0847	1.67505	GIMAP7	GTPase, IMAP family member 7
417028	1.17e-07	9.9e-10	7.51074	12.0531	1.09017	LCMT1	leucine carboxyl methyltransferase 1
132036	1.13e-07	9.52e-10	7.42821	12.0498	0.908268	ACTR8	ARP8 actin-related protein 8 homolog
176018	1.13e-07	9.45e-10	7.40189	12.0486	1.07337	SMARCA4	SWI/SNF related, matrix associated, actin dependent regulator of chromatin, subfamily a, member 4
132092	1.23e-07	1.04e-09	7.46443	12.008	1.91366	LLPH	LLP homolog, long-term synaptic facilitation
423076	1.27e-07	1.09e-09	7.48347	11.9842	1.90367	RAPGEF1	Rap guanine nucleotide exchange factor 1
205082	1.23e-07	1.04e-09	7.37488	11.9497	1.27317	ADD2	adducin 2
143079	1.44e-07	1.26e-09	7.81227	11.9386	2.34874	BOD1L1	biorientation of chromosomes in cell division 1 like 1
382090	1.26e-07	1.07e-09	7.36789	11.9241	1.10027	SNRNP35	small nuclear ribonucleoprotein U11/U12 subunit 35
204059	1.28e-07	1.1e-09	7.38813	11.9183	2.63262	AIF1///MSH5-SAPCD1///MSH5	allograft inflammatory factor 1///MSH5-SAPCD1 readthrough (NMD candidate)///mutS homolog 5
494089	1.27e-07	1.08e-09	7.36596	11.9171	1.98344	PSMD7	proteasome 26S subunit, non-ATPase 7
319012	1.27e-07	1.09e-09	7.36414	11.9104	1.14957	KIAA0040	KIAA0040
167020	1.35e-07	1.17e-09	7.53176	11.906	1.65907	KANTR	KDM5C adjacent non-coding transcript
483011	1.47e-07	1.31e-09	7.5747	11.8639	1.7826	EVL	Enah/Vasp-like
271030	1.45e-07	1.29e-09	-7.66328	11.8484	-0.949686	RAB1B///RAB1C	RAB1B, member RAS oncogene family///RAB1C, member RAS oncogene family pseudogene
165009	1.35e-07	1.18e-09	7.37122	11.8432	1.98181	BDKRB2	bradykinin receptor B2
231022	1.44e-07	1.27e-09	-7.50941	11.8173	-1.60818	SYTL2	synaptotagmin like 2
387074	1.43e-07	1.25e-09	7.32592	11.7704	1.82526	IFI16	interferon gamma inducible protein 16
373069	1.43e-07	1.26e-09	7.32512	11.7675	0.973827	ANKRD28	ankyrin repeat domain 28
236088	1.6e-07	1.44e-09	-7.67415	11.7508	-1.04958	ECI1	enoyl-CoA delta isomerase 1
313090	1.54e-07	1.38e-09	-7.4849	11.733	-1.83979	ID3	inhibitor of DNA binding 3, HLH protein
237081	1.54e-07	1.38e-09	-7.41863	11.7166	-1.6946	ANKRD13D	ankyrin repeat domain 13D
480003	1.61e-07	1.46e-09	7.40302	11.7026	1.33627	SH2B3	SH2B adaptor protein 3
289059	1.79e-07	1.69e-09	-7.67221	11.6079	-0.886248	OGDH	oxoglutarate dehydrogenase
310084	1.69e-07	1.55e-09	7.324	11.6067	2.27734	PCMT1	protein-L-isoaspartate (D-aspartate) O-methyltransferase
431051	1.65e-07	1.51e-09	7.33146	11.6049	1.22436	LAMB2	laminin subunit beta 2
37089	1.63e-07	1.48e-09	7.28064	11.6046	2.23041	KCNJ8	potassium voltage-gated channel subfamily J member 8
44033	1.64e-07	1.5e-09	7.30533	11.6042	1.18242	NR1I3	nuclear receptor subfamily 1 group I member 3
196088	1.65e-07	1.5e-09	7.27721	11.5921	2.02463	SIK1	salt inducible kinase 1
332077	1.81e-07	1.72e-09	7.53405	11.584	1.95887	LYRM2	LYR motif containing 2
179080	1.78e-07	1.67e-09	7.39616	11.5467	1.27031	CLDN12	claudin 12
86041	1.73e-07	1.6e-09	7.31513	11.5462	1.32962	IPO4	importin 4
355073	1.73e-07	1.6e-09	7.26118	11.5334	1.16428	POLR3C	RNA polymerase III subunit C
452076	1.73e-07	1.6e-09	7.26066	11.5315	1.5982	OAZ1	ornithine decarboxylase antizyme 1
262080	1.73e-07	1.6e-09	7.26005	11.5292	1.48488	RPS27A///RPS27A	ribosomal protein S27a///ribosomal protein S27a
79026	1.78e-07	1.66e-09	7.27757	11.5178	2.01856	LY96	lymphocyte antigen 96
17020	1.75e-07	1.63e-09	7.25629	11.5155	1.08886	VPS16	VPS16, CORVET/HOPS core subunit
195110	1.93e-07	1.84e-09	-7.59886	11.5081	-1.19816	DAPK3	death associated protein kinase 3
325040	1.76e-07	1.64e-09	7.25351	11.5053	2.37038	ADM///ADM	adrenomedullin///adrenomedullin
393030	1.78e-07	1.67e-09	7.2488	11.488	1.93789	PELI1	pellino E3 ubiquitin protein ligase 1
153023	1.96e-07	1.89e-09	-7.5915	11.4843	-1.57738	GNPNAT1	glucosamine-phosphate N-acetyltransferase 1
282065	1.8e-07	1.7e-09	7.24477	11.4733	1.71544	USP39	ubiquitin specific peptidase 39
256020	1.8e-07	1.71e-09	7.24315	11.4673	1.7407	LAMB2	laminin subunit beta 2
110095	1.81e-07	1.72e-09	7.24069	11.4584	1.48669	SLU7	SLU7 homolog, splicing factor
364024	1.89e-07	1.8e-09	7.28305	11.445	1.52316	NUDT9	nudix hydrolase 9
16091	2.03e-07	1.96e-09	7.41958	11.4364	1.146	BLOC1S4	biogenesis of lysosomal organelles complex 1 subunit 4
388012	1.93e-07	1.85e-09	7.22199	11.3899	1.7247	NDUFA5	NADH:ubiquinone oxidoreductase subunit A5
441029	2.21e-07	2.17e-09	7.50667	11.3583	1.51766	LNPK	lunapark, ER junction formation factor
194108	2.18e-07	2.13e-09	7.32893	11.3128	1.58564	SLC13A4	solute carrier family 13 member 4
78067	2.46e-07	2.45e-09	7.5122	11.2813	2.15725	TFB1M	transcription factor B1, mitochondrial
163046	2.18e-07	2.13e-09	7.1845	11.2525	0.931265	ABCB7	ATP binding cassette subfamily B member 7
145098	2.18e-07	2.13e-09	7.18441	11.2522	1.09717	DDX5///BEST1///FTH1	DEAD-box helicase 5///bestrophin 1///ferritin heavy chain 1
274092	2.22e-07	2.19e-09	7.20279	11.2468	1.4989	PAF1	PAF1 homolog, Paf1/RNA polymerase II complex component
89078	2.21e-07	2.17e-09	-7.17925	11.2333	-1.73937	UGCG	UDP-glucose ceramide glucosyltransferase
354111	2.38e-07	2.36e-09	7.23799	11.19	1.884	HDAC7	histone deacetylase 7
144046	2.62e-07	2.63e-09	-7.49103	11.1597	-1.60901	GFPT1	glutamine--fructose-6-phosphate transaminase 1
480067	2.45e-07	2.43e-09	7.17427	11.1286	1.37725	ECD	ecdysoneless cell cycle regulator
453053	2.65e-07	2.67e-09	7.33134	11.1103	1.22193	FAM174A///FAM174A	family with sequence similarity 174 member A///family with sequence similarity 174 member A
11025	2.67e-07	2.69e-09	7.12132	11.0212	1.37133	DUSP23	dual specificity phosphatase 23
102109	2.7e-07	2.74e-09	7.11649	11.0035	1.44605	IFT52	intraflagellar transport 52
37077	2.76e-07	2.81e-09	7.10991	10.9794	1.52572	FAS	Fas cell surface death receptor
11038	2.79e-07	2.84e-09	7.1065	10.9669	1.24572	TIMM50	translocase of inner mitochondrial membrane 50
416028	2.83e-07	2.9e-09	7.12706	10.9573	1.18919	FUNDC2	FUN14 domain containing 2
256076	2.83e-07	2.9e-09	-7.12704	10.9572	-1.56931	ABCD3	ATP binding cassette subfamily D member 3
65078	2.84e-07	2.91e-09	7.10059	10.9452	2.63274	FN1	fibronectin 1
480039	2.89e-07	2.97e-09	7.14721	10.9427	1.61752	ANKS1A///ANKS1A	ankyrin repeat and sterile alpha motif domain containing 1A///ankyrin repeat and sterile alpha motif domain containing 1A
6022	4.25e-07	4.76e-09	-8.92914	10.8885	-2.22994	HIST1H4L	histone cluster 1, H4l
373023	3.08e-07	3.2e-09	7.10025	10.86	1.49523	EID2	EP300 interacting inhibitor of differentiation 2
476085	3.11e-07	3.23e-09	7.12414	10.8598	1.33525	HAVCR2	hepatitis A virus cellular receptor 2
216112	3.08e-07	3.19e-09	7.0756	10.8537	1.32299	RSPRY1	ring finger and SPRY domain containing 1
445096	3.12e-07	3.25e-09	7.07083	10.8363	1.47929	ARL5A	ADP ribosylation factor like GTPase 5A
309098	3.27e-07	3.43e-09	-7.16396	10.8198	-1.61449	NUP50	nucleoporin 50
240054	3.18e-07	3.32e-09	7.06512	10.8154	2.40362	NNMT///TP73-AS1	nicotinamide N-methyltransferase///TP73 antisense RNA 1
303009	3.19e-07	3.34e-09	7.06353	10.8095	2.55867	RPL26	ribosomal protein L26
148037	3.32e-07	3.5e-09	7.05065	10.7624	2.11809	A2M	alpha-2-macroglobulin
464020	3.37e-07	3.56e-09	7.04618	10.746	1.10737	TMSB4X///TMSB4XP2///TMSB4XP1	thymosin beta 4, X-linked///thymosin beta 4, X-linked pseudogene 2///thymosin beta 4, X-linked pseudogene 1
283001	3.38e-07	3.59e-09	7.04412	10.7385	1.44352	RPS19///RPS19	ribosomal protein S19///ribosomal protein S19
291048	3.54e-07	3.78e-09	-7.10833	10.7144	-0.91777	PDXK	pyridoxal (pyridoxine, vitamin B6) kinase
398029	3.99e-07	4.43e-09	-7.46643	10.6862	-1.29408	EPHX1	epoxide hydrolase 1
446053	3.78e-07	4.11e-09	-7.24082	10.6834	-1.06783	TMEM175	transmembrane protein 175
190037	3.73e-07	4.01e-09	7.14968	10.6748	1.11851	ZNF263	zinc finger protein 263
46095	3.76e-07	4.07e-09	7.06105	10.633	0.857328	C17orf50	chromosome 17 open reading frame 50
37082	3.73e-07	4.01e-09	7.0146	10.6304	1.14737	PRPF6	pre-mRNA processing factor 6
71049	3.75e-07	4.05e-09	7.01163	10.6195	1.41053	FUNDC2P2///FUNDC2	FUN14 domain containing 2 pseudogene 2///FUN14 domain containing 2
182013	4.17e-07	4.66e-09	7.13852	10.5827	1.32641	ARMC8	armadillo repeat containing 8
479022	3.86e-07	4.22e-09	7.00059	10.5791	1.62296	PSMD2	proteasome 26S subunit, non-ATPase 2
493085	3.92e-07	4.33e-09	7.044	10.5717	1.0521	RING1	ring finger protein 1
177081	3.92e-07	4.31e-09	6.99489	10.5582	1.53127	PRPF40A	pre-mRNA processing factor 40 homolog A
380041	3.95e-07	4.38e-09	6.99055	10.5423	1.17958	WDR53	WD repeat domain 53
50095	4.32e-07	4.9e-09	7.09345	10.4786	0.915494	CCDC106	coiled-coil domain containing 106
499024	4.43e-07	5.07e-09	7.11455	10.4702	1.87989	2018-03-06	membrane associated ring-CH-type finger 6
184035	4.26e-07	4.8e-09	-6.99044	10.4615	-0.971582	GFRA2	GDNF family receptor alpha 2
448068	4.25e-07	4.76e-09	6.96805	10.46	1.00781	LOC646014	uncharacterized LOC646014
417023	4.25e-07	4.78e-09	6.96721	10.4569	1.78618	CTSL	cathepsin L
128110	4.45e-07	5.09e-09	7.08282	10.4556	2.54638	COL8A1	collagen type VIII alpha 1 chain
269112	4.31e-07	4.87e-09	6.96215	10.4384	2.02746	TOP1MT	topoisomerase (DNA) I, mitochondrial
17057	4.33e-07	4.92e-09	6.9595	10.4287	1.28241	ADAR	adenosine deaminase, RNA specific
69058	4.83e-07	5.61e-09	-7.30228	10.4274	-1.24711	GPI	glucose-6-phosphate isomerase
214097	4.35e-07	4.96e-09	6.95728	10.4206	1.0888	USP7	ubiquitin specific peptidase 7
57045	4.47e-07	5.13e-09	6.94821	10.3874	1.63644	ATP6V1D	ATPase H+ transporting V1 subunit D
14060	4.51e-07	5.19e-09	6.94494	10.3754	1.57353	MS4A6A	membrane spanning 4-domains A6A
232035	4.9e-07	5.7e-09	-7.18063	10.3741	-0.929865	ZNF782	zinc finger protein 782
193084	4.56e-07	5.27e-09	6.94117	10.3616	1.94115	ENY2	ENY2, transcription and export complex 2 subunit
66013	4.57e-07	5.3e-09	6.93968	10.3561	2.20178	RAB31	RAB31, member RAS oncogene family
61072	4.96e-07	5.77e-09	6.94053	10.2962	3.23124	CXCL2///CXCL2	C-X-C motif chemokine ligand 2///C-X-C motif chemokine ligand 2
316037	5.08e-07	5.93e-09	7.03969	10.291	1.44996	AKR1B1	aldo-keto reductase family 1 member B
409040	5.21e-07	6.12e-09	7.03117	10.2756	2.77481	INHBA	inhibin beta A subunit
30075	5.35e-07	6.34e-09	-7.14945	10.27	-1.24273	LYST	lysosomal trafficking regulator
165101	5.01e-07	5.85e-09	6.91311	10.2589	0.96542	ITSN2	intersectin 2
230076	6.35e-07	8.02e-09	-7.84253	10.2548	-1.20317	PEX11G	peroxisomal biogenesis factor 11 gamma
163017	5.09e-07	5.96e-09	6.90812	10.2406	1.34821	UTP11	UTP11, small subunit processome component homolog (S. cerevisiae)
424055	5.6e-07	6.77e-09	7.09586	10.2214	1.10569	SEC61A2	Sec61 translocon alpha 2 subunit
260004	5.21e-07	6.13e-09	6.90053	10.2129	1.63578	TNFSF10	tumor necrosis factor superfamily member 10
152035	5.88e-07	7.23e-09	-7.31171	10.2051	-2.02705	MAP3K13	mitogen-activated protein kinase kinase kinase 13
18062	5.27e-07	6.22e-09	6.89654	10.1983	1.25769	AIDA	axin interactor, dorsalization associated
354062	5.63e-07	6.83e-09	-7.09326	10.1854	-1.34672	ATP9B	ATPase phospholipid transporting 9B (putative)
162107	5.4e-07	6.41e-09	-6.88861	10.1692	-1.46549	RPS15	ribosomal protein S15
438052	5.73e-07	7e-09	-7.08605	10.161	-1.38918	FZD4	frizzled class receptor 4
398107	5.54e-07	6.66e-09	6.90174	10.1557	1.41882	ERICH1	glutamate rich 1
116055	5.89e-07	7.26e-09	7.07562	10.1532	2.53903	UBE2V2	ubiquitin conjugating enzyme E2 V2
422090	5.48e-07	6.52e-09	-6.88394	10.1522	-1.62137	CYBA	cytochrome b-245 alpha chain
184059	5.94e-07	7.36e-09	7.10552	10.15	1.89571	LSM6	LSM6 homolog, U6 small nuclear RNA and mRNA degradation associated
76048	5.5e-07	6.58e-09	6.88136	10.1427	2.01698	HTRA1	HtrA serine peptidase 1
382098	5.75e-07	7.04e-09	-6.99162	10.1232	-0.993538	LPCAT4	lysophosphatidylcholine acyltransferase 4
486014	6.57e-07	8.34e-09	7.26664	10.1206	1.20283	RNF24	ring finger protein 24
263087	5.6e-07	6.75e-09	6.8746	10.118	1.97392	HTRA3	HtrA serine peptidase 3
221087	5.6e-07	6.77e-09	6.87401	10.1158	1.49831	C10orf128	chromosome 10 open reading frame 128
296062	6.76e-07	8.65e-09	-7.52211	10.1074	-1.20712	FAM60A	family with sequence similarity 60 member A
304013	5.63e-07	6.83e-09	6.87132	10.106	0.996484	VPS28	VPS28, ESCRT-I subunit
362053	6.02e-07	7.48e-09	-7.03463	10.0851	-1.51419	TMUB1	transmembrane and ubiquitin like domain containing 1
150068	5.73e-07	7e-09	-6.86494	10.0827	-1.4573	FOSL2	FOS like 2, AP-1 transcription factor subunit
78106	5.75e-07	7.03e-09	6.86362	10.0778	1.39156	TUBA1C///TUBA1A	tubulin alpha 1c///tubulin alpha 1a
495061	5.92e-07	7.31e-09	6.95303	10.076	1.59495	MSANTD3	Myb/SANT DNA binding domain containing 3
15072	5.76e-07	7.07e-09	6.86226	10.0729	1.5716	RBM38	RNA binding motif protein 38
41063	6.25e-07	7.81e-09	6.99172	10.0617	1.37723	DOCK7	dedicator of cytokinesis 7
204003	5.92e-07	7.32e-09	6.85295	10.0388	1.13428	MAP4K5	mitogen-activated protein kinase kinase kinase kinase 5
2111	6.74e-07	8.58e-09	7.17195	10.033	1.24503	TRIM39	tripartite motif containing 39
431011	6.33e-07	7.98e-09	6.85299	9.97913	1.66207	HIVEP2	human immunodeficiency virus type I enhancer binding protein 2
79081	6.32e-07	7.94e-09	6.87833	9.97613	1.85041	AUTS2	autism susceptibility candidate 2
414081	6.27e-07	7.87e-09	6.83343	9.9674	2.02713	FCER1G///SF3B1	Fc fragment of IgE receptor Ig///splicing factor 3b subunit 1
358044	6.76e-07	8.62e-09	7.02544	9.95619	2.12189	PPP1R7	protein phosphatase 1 regulatory subunit 7
32041	6.51e-07	8.25e-09	6.82089	9.92153	1.26166	ACSL4	acyl-CoA synthetase long-chain family member 4
246017	6.53e-07	8.28e-09	6.81994	9.91804	1.3056	AMZ2	archaelysin family metallopeptidase 2
376001	6.76e-07	8.64e-09	6.80848	9.87615	1.22927	NDUFAF5	NADH:ubiquinone oxidoreductase complex assembly factor 5
334001	7.1e-07	9.12e-09	6.8656	9.85005	1.04082	MTDH	metadherin
446052	7.15e-07	9.21e-09	6.81411	9.8383	1.70607	SMARCE1///FAM21A///FAM21C	SWI/SNF related, matrix associated, actin dependent regulator of chromatin, subfamily e, member 1///family with sequence similarity 21 member A///family with sequence similarity 21 member C
52040	7.71e-07	1.01e-08	6.94839	9.83588	1.04948	EXT2	exostosin glycosyltransferase 2
27075	7.15e-07	9.2e-09	6.79163	9.81453	1.46085	LGALS8	galectin 8
37081	7.65e-07	9.98e-09	6.84073	9.79413	1.70033	SH3PXD2B	SH3 and PX domains 2B
340054	7.38e-07	9.55e-09	6.7815	9.77751	1.05314	MCM3AP	minichromosome maintenance complex component 3 associated protein
67021	7.38e-07	9.57e-09	6.78094	9.77547	1.67624	GTPBP4	GTP binding protein 4
39049	7.65e-07	1e-08	-6.7691	9.73217	-1.07647	NCSTN	nicastrin
501077	8.3e-07	1.11e-08	-7.01844	9.72985	-1.06305	C19orf25	chromosome 19 open reading frame 25
297002	8.84e-07	1.2e-08	6.96221	9.71993	1.74198	UHRF1BP1L	UHRF1 binding protein 1 like
282007	7.91e-07	1.04e-08	6.7595	9.69709	1.74442	CTSK	cathepsin K
461055	8.03e-07	1.06e-08	6.77718	9.68813	1.37838	FUNDC1	FUN14 domain containing 1
410020	8.3e-07	1.11e-08	-6.86437	9.67884	-0.90775	FAM46C	family with sequence similarity 46 member C
405044	8.38e-07	1.13e-08	6.85909	9.67542	2.00822	ADAMTS9	ADAM metallopeptidase with thrombospondin type 1 motif 9
247003	9.18e-07	1.27e-08	7.01567	9.67055	2.74572	NOL7	nucleolar protein 7
73088	8.11e-07	1.07e-08	6.75129	9.6671	1.14315	CLCC1	chloride channel CLIC like 1
172054	8.53e-07	1.15e-08	6.82687	9.64654	1.72955	HABP4	hyaluronan binding protein 4
355002	8.25e-07	1.09e-08	6.74498	9.64405	0.985754	RELA	RELA proto-oncogene, NF-kB subunit
269077	8.28e-07	1.1e-08	6.74359	9.63896	1.25874	RPUSD4	RNA pseudouridylate synthase domain containing 4
182055	9.05e-07	1.24e-08	-7.02289	9.6387	-1.41667	NAPEPLD	N-acyl phosphatidylethanolamine phospholipase D
247030	8.3e-07	1.11e-08	6.74205	9.63332	1.37569	ADK	adenosine kinase
186060	8.3e-07	1.11e-08	6.74084	9.6289	1.21991	DDX42	DEAD-box helicase 42
247028	9.05e-07	1.23e-08	6.92135	9.61803	0.751334	GON4L	gon-4 like
160038	8.38e-07	1.13e-08	6.73696	9.61472	1.13998	CNOT10	CCR4-NOT transcription complex subunit 10
60112	9.28e-07	1.29e-08	6.94142	9.58848	0.973391	FAM69B	family with sequence similarity 69 member B
151079	8.74e-07	1.18e-08	6.74698	9.57867	0.876898	FBXO42	F-box protein 42
402068	8.79e-07	1.19e-08	6.745	9.57153	1.21126	DHX30	DEAH-box helicase 30
487096	9.99e-07	1.42e-08	-7.18965	9.56796	-1.16645	GATAD1	GATA zinc finger domain containing 1
272107	9.05e-07	1.24e-08	6.78123	9.56562	1.27093	OGFRL1	opioid growth factor receptor like 1
408023	9.05e-07	1.23e-08	6.75828	9.56105	1.57019	MMP19	matrix metallopeptidase 19
456052	8.85e-07	1.2e-08	6.71958	9.55122	1.65517	UGP2	UDP-glucose pyrophosphorylase 2
135025	9.66e-07	1.37e-08	6.86136	9.53954	1.37752	WDFY2	WD repeat and FYVE domain containing 2
249034	9.34e-07	1.3e-08	6.79348	9.52892	1.90608	TMEM158	transmembrane protein 158 (gene/pseudogene)
454040	9.1e-07	1.25e-08	6.70998	9.51615	1.28376	SH3BGRL3///TPM3	SH3 domain binding glutamate rich protein like 3///tropomyosin 3
204031	9.21e-07	1.27e-08	6.74948	9.51318	1.84915	FXYD5///SAE1	FXYD domain containing ion transport regulator 5///SUMO1 activating enzyme subunit 1
77065	9.15e-07	1.26e-08	6.70821	9.50966	1.75541	PTMA	prothymosin, alpha
238073	9.49e-07	1.32e-08	6.81389	9.50256	2.32485	PDCD5	programmed cell death 5
146057	9.74e-07	1.38e-08	6.85857	9.49755	1.31059	CDC42	cell division cycle 42
268062	9.48e-07	1.32e-08	-6.76348	9.48649	-0.888062	LOC101928134	uncharacterized LOC101928134
18013	9.32e-07	1.29e-08	6.70028	9.4807	1.70955	OLFML2A///OLFML2A	olfactomedin like 2A///olfactomedin like 2A
15049	9.54e-07	1.34e-08	6.71233	9.46991	2.02522	LST1	leukocyte specific transcript 1
450014	9.88e-07	1.41e-08	-6.85309	9.46439	-0.980925	POU3F4	POU class 3 homeobox 4
311048	9.48e-07	1.32e-08	6.69452	9.45967	1.22874	POLR2B	RNA polymerase II subunit B
467057	1.29e-06	1.94e-08	-7.77603	9.45401	-1.11959	CDC5L	cell division cycle 5 like
468044	9.54e-07	1.34e-08	6.71244	9.45355	0.978544	FBXO9	F-box protein 9
353083	9.51e-07	1.33e-08	6.6928	9.45338	2.02151	PPIAL4A///PPIA	peptidylprolyl isomerase A like 4A///peptidylprolyl isomerase A
143059	1e-06	1.43e-08	-6.84812	9.44741	-0.905324	STMN2	stathmin 2
151026	9.59e-07	1.35e-08	6.70995	9.44455	1.84363	LRRC32	leucine rich repeat containing 32
193103	9.59e-07	1.36e-08	6.68762	9.43445	1.13833	IL15RA	interleukin 15 receptor subunit alpha
341019	1.14e-06	1.68e-08	6.96757	9.42142	1.44489	PDCD2	programmed cell death 2
157100	1.05e-06	1.51e-08	6.75128	9.41571	1.99558	SH3RF3	SH3 domain containing ring finger 3
439083	1.14e-06	1.68e-08	6.93121	9.39683	1.6855	CWC27	CWC27 spliceosome associated protein homolog
441110	1.01e-06	1.45e-08	6.69179	9.37877	1.17998	TMIGD2	transmembrane and immunoglobulin domain containing 2
396090	1.06e-06	1.52e-08	6.74923	9.35729	1.2568	SRGAP2	SLIT-ROBO Rho GTPase activating protein 2
163083	1.03e-06	1.48e-08	6.6645	9.35003	0.973744	FAM188A	family with sequence similarity 188 member A
187009	1.03e-06	1.48e-08	6.66445	9.34986	1.34146	EIF3A///EIF3A	eukaryotic translation initiation factor 3 subunit A///eukaryotic translation initiation factor 3 subunit A
228107	1.04e-06	1.49e-08	-6.66149	9.33905	-1.06026	MRPL54	mitochondrial ribosomal protein L54
415017	1.22e-06	1.81e-08	-7.11241	9.33347	-1.16527	C8orf44	chromosome 8 open reading frame 44
331059	1.06e-06	1.52e-08	6.67794	9.32861	1.36877	B3GNT2	UDP-GlcNAc:betaGal beta-1,3-N-acetylglucosaminyltransferase 2
230023	1.06e-06	1.54e-08	6.67574	9.32063	0.932474	IFT80	intraflagellar transport 80
66001	1.16e-06	1.7e-08	-6.85863	9.29819	-1.14914	NAPEPLD	N-acyl phosphatidylethanolamine phospholipase D
437028	1.26e-06	1.89e-08	-7.05334	9.27771	-1.16804	SLC35C2	solute carrier family 35 member C2
146085	1.1e-06	1.59e-08	6.64395	9.27503	1.18374	MFSD12	major facilitator superfamily domain containing 12
493001	1.41e-06	2.18e-08	7.32756	9.27421	1.23322	DEF6	DEF6, guanine nucleotide exchange factor
100024	1.13e-06	1.65e-08	6.67788	9.2561	1.32322	COL18A1	collagen type XVIII alpha 1 chain
19013	1.13e-06	1.64e-08	6.63588	9.24556	1.08804	GOLGA5	golgin A5
324031	1.22e-06	1.82e-08	-6.83994	9.23563	-0.896042	WWC1	WW and C2 domain containing 1
229079	1.16e-06	1.71e-08	6.66962	9.22643	1.1049	TXNDC15	thioredoxin domain containing 15
30020	1.17e-06	1.73e-08	6.66544	9.21142	1.0114	UBE2H	ubiquitin conjugating enzyme E2 H
457072	1.71e-06	2.8e-08	-8.41462	9.20633	-1.73469	CPTP	ceramide-1-phosphate transfer protein
88103	1.32e-06	2e-08	6.81229	9.20594	2.30608	RPP38	ribonuclease P/MRP subunit p38
302052	1.16e-06	1.72e-08	6.62428	9.20322	1.02828	GPKOW	G-patch domain and KOW motifs
145076	1.17e-06	1.73e-08	-6.6431	9.20248	-1.87774	TOB2	transducer of ERBB2, 2
393069	1.3e-06	1.96e-08	6.67912	9.14369	1.06296	NSD1	nuclear receptor binding SET domain protein 1
322081	1.24e-06	1.85e-08	6.60414	9.12973	1.78072	CD248	CD248 molecule
60056	1.24e-06	1.85e-08	6.60408	9.12952	2.23988	GTF3C6	general transcription factor IIIC subunit 6
67041	1.34e-06	2.04e-08	6.7195	9.12322	1.90673	NELFCD	negative elongation factor complex member C/D
202081	1.25e-06	1.87e-08	6.60109	9.1186	1.81022	YBX1	Y-box binding protein 1
247034	1.38e-06	2.11e-08	6.82755	9.11231	1.16513	LRRC6	leucine rich repeat containing 6
497044	1.6e-06	2.54e-08	-7.27356	9.08637	-1.27884	DNAJC14	DnaJ heat shock protein family (Hsp40) member C14
101069	1.39e-06	2.15e-08	6.65351	9.07254	1.37291	ARMC8	armadillo repeat containing 8
266071	1.51e-06	2.35e-08	6.82901	9.0652	1.55423	CUTC	cutC copper transporter
408064	1.33e-06	2.02e-08	-6.62352	9.061	-1.6379	PXMP2	peroxisomal membrane protein 2
384057	1.66e-06	2.66e-08	-7.32241	9.05726	-1.51648	MEIS2	Meis homeobox 2
47001	1.33e-06	2.01e-08	6.58235	9.05024	1.14193	CCDC91	coiled-coil domain containing 91
52055	1.35e-06	2.05e-08	6.57589	9.02667	1.08685	GNL2	G protein nucleolar 2
254012	1.37e-06	2.09e-08	-6.59221	9.01833	-1.5981	YIPF5	Yip1 domain family member 5
8108	1.59e-06	2.52e-08	6.84392	9.01048	1.82361	ESR1	estrogen receptor 1
393066	1.38e-06	2.1e-08	6.56975	9.0043	0.983552	NDRG3	NDRG family member 3
17083	1.38e-06	2.1e-08	6.5697	9.00409	0.905767	SF3B1	splicing factor 3b subunit 1
159033	1.75e-06	2.87e-08	-7.36628	9.00362	-1.14944	HERPUD2	HERPUD family member 2
144075	1.49e-06	2.32e-08	6.68277	8.99658	1.61576	RNF139	ring finger protein 139
178075	1.51e-06	2.36e-08	6.65216	8.98968	1.73964	IL1R1	interleukin 1 receptor type 1
437064	1.39e-06	2.14e-08	6.5653	8.98805	1.56799	FNTA	farnesyltransferase, CAAX box, alpha
101108	1.39e-06	2.14e-08	6.56518	8.98762	2.06054	FBXO32	F-box protein 32
21019	1.41e-06	2.19e-08	6.55925	8.96601	1.00643	CCDC9	coiled-coil domain containing 9
452047	1.47e-06	2.28e-08	6.54787	8.92452	1.46451	ATG3	autophagy related 3
473039	1.6e-06	2.55e-08	-6.77171	8.9141	-1.13392	TNFSF12-TNFSF13///TNFSF13	TNFSF12-TNFSF13 readthrough///tumor necrosis factor superfamily member 13
92032	1.59e-06	2.51e-08	6.58636	8.91093	2.62429	PLA2G7	phospholipase A2 group VII
55081	1.67e-06	2.72e-08	6.82004	8.90239	1.40196	LOC100506990///LOC100287869///FLJ44896///LOC283911	uncharacterized LOC100506990///uncharacterized LOC100287869///FLJ44896 protein///uncharacterized LOC283911
111069	1.7e-06	2.78e-08	6.68626	8.89449	1.91638	HOOK3	hook microtubule tethering protein 3
369033	1.51e-06	2.36e-08	6.53809	8.88885	1.15229	SLC38A10	solute carrier family 38 member 10
280073	1.57e-06	2.47e-08	-6.61385	8.88017	-1.19746	SEC24A	SEC24 homolog A, COPII coat complex component
330045	1.66e-06	2.68e-08	6.56787	8.84547	3.45647	C3///ADH1B	complement component 3///alcohol dehydrogenase 1B (class I), beta polypeptide
309065	1.58e-06	2.49e-08	6.5238	8.83678	1.28453	UPF3B	UPF3 regulator of nonsense transcripts homolog B (yeast)
160017	1.58e-06	2.49e-08	6.52379	8.83674	1.5066	PLK2	polo like kinase 2
58070	1.59e-06	2.53e-08	6.54063	8.83177	1.00259	DDX20	DEAD-box helicase 20
61024	1.6e-06	2.55e-08	-6.51746	8.81368	-1.6421	RIOK3	RIO kinase 3
12098	1.67e-06	2.71e-08	6.63861	8.81166	1.19613	SWI5	SWI5 homologous recombination repair protein
347093	1.62e-06	2.59e-08	6.53452	8.8097	0.982545	SLC41A1	solute carrier family 41 member 1
25084	1.62e-06	2.59e-08	6.51353	8.79936	1.34132	DDX49	DEAD-box helicase 49
143071	1.88e-06	3.16e-08	6.74076	8.79596	1.9665	POLR1C	RNA polymerase I subunit C
240091	1.64e-06	2.64e-08	-6.52928	8.79075	-0.966291	GAN	gigaxonin
476008	1.66e-06	2.67e-08	6.54701	8.78662	1.25321	DNM1L	dynamin 1 like
15097	1.77e-06	2.92e-08	6.70129	8.78577	2.25498	BTF3	basic transcription factor 3
16108	1.66e-06	2.66e-08	6.52653	8.7808	1.58793	PRSS23	protease, serine 23
228089	1.66e-06	2.69e-08	6.50312	8.76141	1.26138	COPS2	COP9 signalosome subunit 2
60101	1.78e-06	2.96e-08	6.61368	8.75839	1.12569	WWC3	WWC family member 3
271083	1.68e-06	2.73e-08	6.4999	8.74969	1.28619	SNUPN	snurportin 1
15091	1.97e-06	3.34e-08	6.60508	8.74063	3.81535	CYR61	cysteine rich angiogenic inducer 61
153088	1.7e-06	2.76e-08	6.49624	8.73637	1.0727	SENP6	SUMO1/sentrin specific peptidase 6
205024	1.72e-06	2.81e-08	-6.53296	8.73624	-0.912967	MED14	mediator complex subunit 14
11057	1.92e-06	3.23e-08	-6.84173	8.73362	-0.975261	PWAR6	Prader Willi/Angelman region RNA 6
116042	1.7e-06	2.77e-08	6.49539	8.73326	1.58065	EMILIN2	elastin microfibril interfacer 2
212027	1.74e-06	2.85e-08	-6.50849	8.71562	-0.923699	RAB5C///RPL21	RAB5C, member RAS oncogene family///ribosomal protein L21
92066	1.78e-06	2.94e-08	6.49937	8.70027	1.65214	ITGA5	integrin subunit alpha 5
19034	1.78e-06	2.96e-08	6.49817	8.69592	1.16896	TBCB	tubulin folding cofactor B
130068	1.83e-06	3.04e-08	6.51171	8.67737	1.49836	BLVRA	biliverdin reductase A
227049	1.95e-06	3.3e-08	-6.69573	8.66256	-0.665686	KIF3B	kinesin family member 3B
11005	1.84e-06	3.08e-08	6.50819	8.64748	0.827303	AGGF1	angiogenic factor with G-patch and FHA domains 1
25095	1.83e-06	3.06e-08	6.4885	8.6434	1.06074	TOR1A///TOR1A	torsin family 1 member A///torsin family 1 member A
19048	1.83e-06	3.06e-08	6.48846	8.64323	1.42276	CLIC1	chloride intracellular channel 1
315109	1.84e-06	3.08e-08	6.46725	8.63077	1.90155	C19orf43	chromosome 19 open reading frame 43
326027	2.05e-06	3.49e-08	-6.71063	8.61842	-0.842017	JUND	JunD proto-oncogene, AP-1 transcription factor subunit
214006	1.9e-06	3.2e-08	6.45648	8.59157	1.41042	TAF10	TATA-box binding protein associated factor 10
98064	1.97e-06	3.34e-08	6.48572	8.58437	1.56773	ACYP1	acylphosphatase 1
473052	2.06e-06	3.51e-08	6.4315	8.50068	1.97584	APOLD1	apolipoprotein L domain containing 1
179065	2.17e-06	3.72e-08	6.50002	8.49606	1.25298	TSHZ3	teashirt zinc finger homeobox 3
40065	2.13e-06	3.65e-08	6.48297	8.48912	0.886926	ZFP41	ZFP41 zinc finger protein
37088	2.09e-06	3.56e-08	6.42805	8.4881	1.40306	CHSY1	chondroitin sulfate synthase 1
267084	2.11e-06	3.6e-08	6.42516	8.47761	1.57279	NRBF2	nuclear receptor binding factor 2
18075	2.12e-06	3.63e-08	6.42309	8.47004	1.21405	MGEA5	meningioma expressed antigen 5 (hyaluronidase)
501045	2.17e-06	3.74e-08	6.45515	8.45752	1.63971	ETV7	ETS variant 7
326056	2.15e-06	3.68e-08	6.41873	8.45419	1.85519	LOC105374313	uncharacterized LOC105374313
241074	2.17e-06	3.73e-08	6.41522	8.44144	1.26314	SON	SON DNA binding protein
338022	2.39e-06	4.17e-08	6.568	8.44013	2.82972	CYCS	cytochrome c, somatic
150104	2.17e-06	3.74e-08	6.41479	8.43988	0.941892	MALT1	MALT1 paracaspase
61014	2.17e-06	3.74e-08	-6.41444	8.43861	-1.009	GHSR	growth hormone secretagogue receptor
367102	2.18e-06	3.77e-08	6.41277	8.43252	1.47179	OXA1L	OXA1L, mitochondrial inner membrane protein
366076	2.2e-06	3.8e-08	6.41018	8.42309	1.27091	RPL36	ribosomal protein L36
36079	2.56e-06	4.55e-08	6.63105	8.42187	1.88498	RPL10L///SNORA70///RPL10///DNASE1L1	ribosomal protein L10 like///small nucleolar RNA, H/ACA box 70///ribosomal protein L10///deoxyribonuclease 1 like 1
295040	2.37e-06	4.12e-08	-6.54477	8.40952	-1.06783	DCUN1D5	defective in cullin neddylation 1 domain containing 5
347061	2.4e-06	4.2e-08	-6.56631	8.40244	-0.745142	MRPS18C	mitochondrial ribosomal protein S18C
303011	2.34e-06	4.08e-08	6.45242	8.39791	0.7228	ZMYM6	zinc finger MYM-type containing 6
20009	2.39e-06	4.18e-08	6.5155	8.38626	1.06217	SSR2	signal sequence receptor subunit 2
36032	2.42e-06	4.26e-08	6.39896	8.33814	2.88978	NACA2///NACAP1///NACA	nascent polypeptide associated complex alpha subunit 2///nascent polypeptide associated complex alpha subunit pseudogene 1///nascent polypeptide-associated complex alpha subunit
112039	2.38e-06	4.15e-08	6.38676	8.33794	2.00782	LGALS12	galectin 12
324071	2.6e-06	4.63e-08	6.51171	8.32956	0.997191	TIGD6	tigger transposable element derived 6
278010	2.48e-06	4.38e-08	-6.47752	8.32858	-0.713067	WASF2	WAS protein family member 2
39034	2.41e-06	4.23e-08	6.38174	8.31969	0.769477	TRAPPC11	trafficking protein particle complex 11
16102	2.42e-06	4.26e-08	6.37974	8.31239	2.12876	IER5	immediate early response 5
252003	2.79e-06	5.01e-08	6.6023	8.27769	0.782073	HAS2-AS1///HAS2	HAS2 antisense RNA 1///hyaluronan synthase 2
17001	2.54e-06	4.49e-08	6.38455	8.2682	1.41553	NUCB2	nucleobindin 2
122077	2.54e-06	4.5e-08	6.36516	8.25943	1.95231	SLC43A3	solute carrier family 43 member 3
136089	2.54e-06	4.5e-08	6.36515	8.25938	1.14293	DARS	aspartyl-tRNA synthetase
78004	2.67e-06	4.77e-08	6.43091	8.23613	1.39237	ASPH	aspartate beta-hydroxylase
229017	2.94e-06	5.36e-08	-6.64813	8.22351	-0.771553	CDC42EP1	CDC42 effector protein 1
322080	2.91e-06	5.25e-08	-6.5576	8.20508	-1.33554	USF1	upstream transcription factor 1
368082	2.71e-06	4.85e-08	6.3447	8.18508	1.47766	POP4	POP4 homolog, ribonuclease P/MRP subunit
311094	2.79e-06	5.02e-08	-6.39525	8.1778	-1.00222	SETD5	SET domain containing 5
76010	2.76e-06	4.95e-08	-6.35837	8.1738	-1.59491	ETNK1	ethanolamine kinase 1
140015	2.92e-06	5.31e-08	-6.49832	8.17228	-1.81833	ERO1B	endoplasmic reticulum oxidoreductase 1 beta
248028	2.99e-06	5.48e-08	6.46337	8.16469	1.02325	PCDHAC2	protocadherin alpha subfamily C, 2
415002	2.79e-06	5.02e-08	6.35441	8.15952	0.987458	HTRA2	HtrA serine peptidase 2
283005	3e-06	5.52e-08	-6.54315	8.15721	-1.74386	FAM83E	family with sequence similarity 83 member E
384085	2.93e-06	5.34e-08	6.37793	8.13391	1.30609	CCDC115	coiled-coil domain containing 115
321011	3.16e-06	5.93e-08	-6.58359	8.11129	-1.43632	LOC105373045///SREBF2	uncharacterized LOC105373045///sterol regulatory element binding transcription factor 2
78025	2.92e-06	5.3e-08	6.32081	8.0983	1.22962	PPAN	peter pan homolog (Drosophila)
145091	2.92e-06	5.3e-08	6.32064	8.09771	2.24125	COL1A1	collagen type I alpha 1 chain
482065	2.93e-06	5.32e-08	6.31953	8.09368	1.28967	LOC100996724///LOC653513///PDE4DIP	phosphodiesterase 4D interacting protein-like///phosphodiesterase 4D interacting protein-like///phosphodiesterase 4D interacting protein
233031	2.93e-06	5.34e-08	-6.31875	8.09084	-0.851785	HAUS8	HAUS augmin like complex subunit 8
222034	2.99e-06	5.48e-08	-6.35006	8.08154	-1.58655	WAC	WW domain containing adaptor with coiled-coil
488087	3.81e-06	7.4e-08	-7.01924	8.07525	-0.945213	COG8///PDF	component of oligomeric golgi complex 8///peptide deformylase (mitochondrial)
19073	2.98e-06	5.45e-08	6.31341	8.07145	1.04915	RPL4	ribosomal protein L4
426100	2.99e-06	5.5e-08	6.3107	8.06161	0.917769	SUPT6H	SPT6 homolog, histone chaperone
408043	3e-06	5.52e-08	6.3096	8.05761	0.968732	USP3	ubiquitin specific peptidase 3
435073	3.04e-06	5.61e-08	6.30544	8.04251	0.892143	PHF11	PHD finger protein 11
263061	3.04e-06	5.62e-08	6.30486	8.0404	1.03002	IWS1	IWS1, SUPT6H interacting protein
89105	3.27e-06	6.15e-08	6.38224	8.03202	1.26238	NCK1	NCK adaptor protein 1
127038	3.17e-06	5.95e-08	6.36959	8.02056	1.37892	XPNPEP3///XPNPEP3	X-prolyl aminopeptidase 3///X-prolyl aminopeptidase 3
328006	3.09e-06	5.74e-08	6.2992	8.01987	1.12007	SAP18///KRT8	Sin3A associated protein 18///keratin 8
79112	3.36e-06	6.38e-08	6.47165	8.01748	0.857484	ZRANB1	zinc finger RANBP2-type containing 1
163089	3.71e-06	7.16e-08	-6.71154	8.0083	-1.55843	RPS6KB2	ribosomal protein S6 kinase B2
446074	3.13e-06	5.84e-08	-6.29439	8.00241	-1.83282	RBM3	RNA binding motif (RNP1, RRM) protein 3
260093	3.16e-06	5.93e-08	6.2903	7.98757	1.59285	FAM120AOS	family with sequence similarity 120A opposite strand
311013	3.37e-06	6.41e-08	6.394	7.98327	1.3357	PLXDC2	plexin domain containing 2
477014	3.19e-06	6e-08	6.2872	7.97634	0.701964	ENTPD1-AS1///CC2D2B	ENTPD1 antisense RNA 1///coiled-coil and C2 domain containing 2B
266078	3.43e-06	6.54e-08	6.36486	7.95297	1.00791	BEST2	bestrophin 2
274009	3.81e-06	7.38e-08	6.48643	7.95134	1.88636	SFPQ	splicing factor proline and glutamine rich
449039	3.52e-06	6.73e-08	-6.45605	7.95006	-1.06752	OR52A1	olfactory receptor family 52 subfamily A member 1
369005	3.27e-06	6.18e-08	6.27949	7.94837	0.894903	SECISBP2///SECISBP2	SECIS binding protein 2///SECIS binding protein 2
483025	3.69e-06	7.11e-08	6.44015	7.94776	1.85854	TXNDC12	thioredoxin domain containing 12
454038	3.28e-06	6.19e-08	6.27903	7.9467	1.55298	RBPMS	RNA binding protein with multiple splicing
282064	3.67e-06	7.03e-08	6.4433	7.93964	1.07162	KLHL5	kelch like family member 5
10104	3.77e-06	7.28e-08	6.49031	7.91132	0.871969	PTPN4	protein tyrosine phosphatase, non-receptor type 4
344005	3.37e-06	6.42e-08	6.2689	7.90994	1.07807	WDR33	WD repeat domain 33
2055	3.83e-06	7.46e-08	6.42604	7.90071	1.21523	RBMX2	RNA binding motif protein, X-linked 2
446081	4.04e-06	8.02e-08	6.40491	7.87189	1.62926	ENTPD1	ectonucleoside triphosphate diphosphohydrolase 1
244076	3.62e-06	6.93e-08	6.28595	7.87067	1.28175	RPS6KA3	ribosomal protein S6 kinase A3
361111	3.82e-06	7.42e-08	6.37606	7.86697	1.04315	FAM114A2	family with sequence similarity 114 member A2
137074	3.95e-06	7.76e-08	-6.5346	7.86069	-1.26782	DESI2	desumoylating isopeptidase 2
46110	3.69e-06	7.11e-08	6.29901	7.85456	0.948836	ALKBH1	alkB homolog 1, histone H2A dioxygenase
10101	3.89e-06	7.61e-08	6.3453	7.85405	1.51009	MCPH1-AS1///MCPH1	MCPH1 antisense RNA 1///microcephalin 1
189012	3.59e-06	6.88e-08	6.25033	7.84261	0.879371	MBD2	methyl-CpG binding domain protein 2
172055	3.72e-06	7.18e-08	6.23894	7.80131	1.10644	OCIAD1	OCIA domain containing 1
114106	3.88e-06	7.58e-08	6.302	7.80063	1.18592	BPGM///RPS5	bisphosphoglycerate mutase///ribosomal protein S5
186017	3.76e-06	7.26e-08	6.23581	7.78999	1.22297	UBR5	ubiquitin protein ligase E3 component n-recognin 5
247055	4.11e-06	8.19e-08	-6.45507	7.78158	-1.32271	DOLPP1	dolichyldiphosphatase 1
135054	3.79e-06	7.33e-08	6.23328	7.78081	1.24046	PAIP1	poly(A) binding protein interacting protein 1
110078	4.29e-06	8.69e-08	-6.56965	7.77707	-0.887035	GDAP2	ganglioside induced differentiation associated protein 2
364045	4.33e-06	8.8e-08	6.46382	7.77065	0.760151	PDZD4	PDZ domain containing 4
118003	4.18e-06	8.38e-08	6.39187	7.76784	1.09189	PLEKHA3	pleckstrin homology domain containing A3
141008	3.99e-06	7.91e-08	-6.33402	7.75983	-1.21333	CAMK2D	calcium/calmodulin dependent protein kinase II delta
90029	3.85e-06	7.5e-08	6.22698	7.75799	1.31651	FAM181A	family with sequence similarity 181 member A
446087	3.95e-06	7.78e-08	6.27389	7.74777	1.39301	LOC153684	uncharacterized LOC153684
38021	3.93e-06	7.7e-08	-6.23828	7.74142	-1.23766	CPT2	carnitine palmitoyltransferase 2
425022	3.98e-06	7.85e-08	6.25173	7.73035	1.07237	THUMPD3	THUMP domain containing 3
331103	3.94e-06	7.73e-08	6.21901	7.72911	0.909761	UBXN7	UBX domain protein 7
371108	4.45e-06	9.09e-08	6.36805	7.72792	1.32036	SLC18A2	solute carrier family 18 member A2
263002	4.21e-06	8.49e-08	-6.3881	7.72252	-1.31715	ZNF782	zinc finger protein 782
231095	3.95e-06	7.78e-08	-6.21708	7.7221	-0.884786	TIA1	TIA1 cytotoxic granule-associated RNA binding protein
355070	3.97e-06	7.84e-08	6.21513	7.71506	1.71207	TNFSF13B	tumor necrosis factor superfamily member 13b
60020	3.98e-06	7.87e-08	6.21421	7.71173	1.09043	CDKN2AIP	CDKN2A interacting protein
439084	4.75e-06	9.86e-08	-6.56761	7.6799	-0.840349	SPIN1	spindlin 1
310077	4.43e-06	9.04e-08	6.25283	7.66901	1.61044	RYBP	RING1 and YY1 binding protein
165022	4.18e-06	8.37e-08	6.21537	7.65905	1.23313	MRPS24	mitochondrial ribosomal protein S24
478025	4.46e-06	9.14e-08	6.34098	7.65591	1.02104	DDX3X	DEAD-box helicase 3, X-linked
145021	4.17e-06	8.35e-08	6.1981	7.65338	1.1701	PILRB///PILRA	paired immunoglobin-like type 2 receptor beta///paired immunoglobin like type 2 receptor alpha
454047	4.19e-06	8.44e-08	6.19534	7.64337	1.3561	MEA1	male-enhanced antigen 1
170005	4.21e-06	8.5e-08	6.19313	7.63539	1.83648	RAC2	ras-related C3 botulinum toxin substrate 2 (rho family, small GTP binding protein Rac2)
487013	4.26e-06	8.62e-08	6.20743	7.63052	1.1428	TRIT1	tRNA isopentenyltransferase 1
472052	5.13e-06	1.08e-07	-6.61917	7.60713	-1.24513	LOC100506551	uncharacterized LOC100506551
277005	4.34e-06	8.82e-08	-6.18332	7.59987	-0.83586	ALDH9A1	aldehyde dehydrogenase 9 family member A1
263033	4.81e-06	1e-07	-6.3947	7.58384	-1.14037	RNPEPL1	arginyl aminopeptidase like 1
395003	4.4e-06	8.99e-08	6.17827	7.58159	2.1798	STEAP4	STEAP4 metalloreductase
242012	4.5e-06	9.23e-08	-6.20731	7.57195	-1.35014	PRKAG1	protein kinase AMP-activated non-catalytic subunit gamma 1
457091	5e-06	1.05e-07	6.254	7.56291	1.86161	CDH5	cadherin 5
375085	4.6e-06	9.48e-08	-6.19994	7.54568	-1.48776	EDEM3	ER degradation enhancing alpha-mannosidase like protein 3
425092	4.77e-06	9.93e-08	6.18715	7.53897	2.27623	BRIX1	BRX1, biogenesis of ribosomes
489003	4.6e-06	9.48e-08	6.18156	7.53759	2.12044	ETS2	ETS proto-oncogene 2, transcription factor
214054	4.83e-06	1.01e-07	6.24304	7.5121	0.897052	PWP2	PWP2 periodic tryptophan protein homolog (yeast)
193097	4.72e-06	9.76e-08	6.17363	7.5091	1.33836	ASAP1	ArfGAP with SH3 domain, ankyrin repeat and PH domain 1
144081	4.77e-06	9.94e-08	6.20609	7.50794	0.828495	UNC45A	unc-45 myosin chaperone A
354038	4.71e-06	9.71e-08	-6.15728	7.50565	-0.887182	MAN2C1	mannosidase alpha class 2C member 1
426064	5.11e-06	1.08e-07	6.26893	7.50193	1.19776	MASTL	microtubule associated serine/threonine kinase like
202005	4.72e-06	9.76e-08	6.15594	7.5008	0.885878	TNFAIP1	TNF alpha induced protein 1
347003	4.77e-06	9.93e-08	6.18718	7.50019	2.17291	CTHRC1	collagen triple helix repeat containing 1
438102	4.72e-06	9.78e-08	6.15545	7.49902	1.65102	FBLN5	fibulin 5
493064	4.73e-06	9.81e-08	6.15457	7.49586	1.07922	PTOV1///NOC4L	prostate tumor overexpressed 1///nucleolar complex associated 4 homolog
58098	5.11e-06	1.08e-07	6.24609	7.49271	1.57317	GOLT1B	golgi transport 1B
30029	5.11e-06	1.08e-07	-6.29353	7.4794	-1.32761	HDHD3	haloacid dehalogenase like hydrolase domain containing 3
404073	4.84e-06	1.01e-07	6.14621	7.46563	1.52907	MAPK1	mitogen-activated protein kinase 1
220075	4.86e-06	1.02e-07	6.14488	7.46081	1.23021	PLOD1	procollagen-lysine,2-oxoglutarate 5-dioxygenase 1
244060	4.98e-06	1.04e-07	-6.19254	7.46003	-1.69857	GFPT1	glutamine--fructose-6-phosphate transaminase 1
101009	5.65e-06	1.22e-07	6.2582	7.45921	1.28527	METTL22	methyltransferase like 22
434050	5.13e-06	1.08e-07	-6.22267	7.44127	-1.13797	EIF3K	eukaryotic translation initiation factor 3 subunit K
361053	4.98e-06	1.04e-07	6.138	7.43593	1.58621	MS4A4A	membrane spanning 4-domains A4A
397083	6.12e-06	1.34e-07	6.30677	7.42966	1.93981	NRP1	neuropilin 1
19070	5.1e-06	1.07e-07	6.13089	7.41023	1.07997	CCT3	chaperonin containing TCP1 subunit 3
106022	5.1e-06	1.07e-07	6.13047	7.4087	1.50765	SERPINH1	serpin family H member 1
16098	5.11e-06	1.08e-07	6.12887	7.40295	1.27814	LPIN1	lipin 1
249006	5.29e-06	1.12e-07	6.17217	7.38805	0.845639	AHCTF1	AT-hook containing transcription factor 1
18073	5.19e-06	1.1e-07	6.12329	7.38275	1.58548	LAMA5	laminin subunit alpha 5
258107	5.21e-06	1.1e-07	6.12244	7.37968	1.58078	IFI30	IFI30, lysosomal thiol reductase
233088	5.74e-06	1.24e-07	6.20596	7.35482	1.40546	MAPK9	mitogen-activated protein kinase 9
248035	5.66e-06	1.22e-07	-6.23349	7.34584	-0.877289	NAF1	nuclear assembly factor 1 ribonucleoprotein
68095	5.37e-06	1.14e-07	6.11301	7.34563	1.37352	GLT8D1	glycosyltransferase 8 domain containing 1
439112	5.42e-06	1.16e-07	6.11028	7.33577	0.978654	SIPA1	signal-induced proliferation-associated 1
198069	5.46e-06	1.17e-07	6.12477	7.33378	0.941096	PTPRA	protein tyrosine phosphatase, receptor type A
201053	5.45e-06	1.17e-07	-6.10797	7.32741	-0.947952	ABHD17A	abhydrolase domain containing 17A
408097	5.51e-06	1.18e-07	6.10393	7.31281	1.04492	ALDOAP2///ALDOA	aldolase, fructose-bisphosphate A pseudogene 2///aldolase, fructose-bisphosphate A
242006	5.51e-06	1.18e-07	6.10381	7.31238	1.29514	GLRX3	glutaredoxin 3
15083	5.52e-06	1.18e-07	6.10345	7.3111	1.0393	RPL35A	ribosomal protein L35a
285032	7.33e-06	1.65e-07	-6.67054	7.30407	-0.935573	PTTG1IP	pituitary tumor-transforming 1 interacting protein
247104	5.76e-06	1.25e-07	-6.18298	7.30338	-0.888205	CHP1	calcineurin like EF-hand protein 1
244026	5.66e-06	1.22e-07	6.11252	7.28986	1.2041	OSGEP	O-sialoglycoprotein endopeptidase
26024	5.68e-06	1.23e-07	6.11143	7.28592	0.996389	POLR2C	RNA polymerase II subunit C
441047	5.91e-06	1.29e-07	6.13407	7.27194	0.993117	TRIM32	tripartite motif containing 32
473040	5.75e-06	1.25e-07	6.107	7.27005	1.33278	MIOS	meiosis regulator for oocyte development
168094	5.78e-06	1.25e-07	6.08787	7.25483	0.926853	PRPSAP2	phosphoribosyl pyrophosphate synthetase associated protein 2
387009	6.21e-06	1.37e-07	-6.24823	7.25435	-1.17115	JOSD2	Josephin domain containing 2
366099	6.01e-06	1.32e-07	6.1098	7.24354	1.7039	UCHL5	ubiquitin C-terminal hydrolase L5
455044	6.06e-06	1.33e-07	-6.16515	7.24146	-0.797745	CDK9	cyclin dependent kinase 9
204094	5.87e-06	1.28e-07	6.08264	7.23595	1.40327	CLPB	ClpB homolog, mitochondrial AAA ATPase chaperonin
361013	5.94e-06	1.3e-07	6.09566	7.2294	1.13216	SPIDR	scaffolding protein involved in DNA repair
228062	6.05e-06	1.32e-07	6.07317	7.20176	1.13649	HUWE1	HECT, UBA and WWE domain containing 1, E3 ubiquitin protein ligase
202041	6.81e-06	1.52e-07	-6.32843	7.20113	-1.58449	GLTP	glycolipid transfer protein
72028	6.21e-06	1.37e-07	6.09948	7.18801	0.972755	AKIRIN2	akirin 2
32096	6.25e-06	1.38e-07	6.09699	7.17916	1.48394	PHLDB1///PHLDB1	pleckstrin homology like domain family B member 1///pleckstrin homology like domain family B member 1
228052	6.2e-06	1.36e-07	6.06531	7.1734	1.16902	UBE2R2	ubiquitin conjugating enzyme E2 R2
307068	7.09e-06	1.59e-07	6.22903	7.16947	1.59719	PRMT9	protein arginine methyltransferase 9
6037	6.26e-06	1.38e-07	6.07848	7.16786	0.894917	TRIM27	tripartite motif containing 27
142028	6.63e-06	1.47e-07	6.11667	7.15166	1.07477	ANKIB1	ankyrin repeat and IBR domain containing 1
359077	7.34e-06	1.66e-07	6.24389	7.14113	1.29694	IST1	IST1, ESCRT-III associated factor
307063	6.72e-06	1.5e-07	-6.15277	7.13542	-1.84459	ANKDD1B	ankyrin repeat and death domain containing 1B
372024	6.49e-06	1.44e-07	6.06786	7.12982	1.0366	GPALPP1	GPALPP motifs containing 1
286075	6.56e-06	1.45e-07	6.04791	7.11064	1.21988	NELFE	negative elongation factor complex member E
492014	6.67e-06	1.48e-07	6.04246	7.09098	1.61523	RAB34	RAB34, member RAS oncogene family
261046	7.44e-06	1.69e-07	6.18733	7.08503	1.73981	EHBP1	EH domain binding protein 1
396096	6.85e-06	1.53e-07	6.05084	7.06886	1.42677	ESF1	ESF1 nucleolar pre-rRNA processing protein homolog
183098	6.87e-06	1.54e-07	6.03291	7.05657	1.28408	SMG6	SMG6, nonsense mediated mRNA decay factor
322059	6.88e-06	1.54e-07	6.03241	7.05478	1.09567	C21orf33	chromosome 21 open reading frame 33
99063	6.89e-06	1.54e-07	6.03166	7.05205	1.51191	PSMB4	proteasome subunit beta 4
309017	7.7e-06	1.76e-07	6.19907	7.05107	1.10285	CWC15	CWC15 spliceosome-associated protein
240005	7.07e-06	1.59e-07	6.07656	7.0506	1.29274	MCFD2	multiple coagulation factor deficiency 2
131001	7.45e-06	1.69e-07	6.07799	7.03679	1.23287	MAFF	MAF bZIP transcription factor F
338019	7.08e-06	1.59e-07	6.02366	7.02323	1.25141	PPM1M	protein phosphatase, Mg2+/Mn2+ dependent 1M
37009	7.08e-06	1.59e-07	6.02363	7.02312	1.816	DLC1	DLC1 Rho GTPase activating protein
251063	7.16e-06	1.61e-07	6.01998	7.00995	1.40593	ATPAF1	ATP synthase mitochondrial F1 complex assembly factor 1
392033	7.19e-06	1.62e-07	-6.01843	7.0044	-0.922171	MSANTD2	Myb/SANT DNA binding domain containing 2
24006	7.42e-06	1.68e-07	6.07956	7.00363	0.875232	SLC16A12	solute carrier family 16 member 12
121006	7.24e-06	1.63e-07	6.01654	6.99758	0.801512	ACP2	acid phosphatase 2, lysosomal
235084	8.91e-06	2.12e-07	6.17001	6.98989	1.29079	LRRC37A2///LRRC37A3///LRRC37A4P///LRRC37A	leucine rich repeat containing 37 member A2///leucine rich repeat containing 37 member A3///leucine rich repeat containing 37 member A4, pseudogene///leucine rich repeat containing 37A
401096	7.59e-06	1.74e-07	-6.08999	6.98065	-0.773363	SIX2	SIX homeobox 2
140026	7.78e-06	1.79e-07	-6.12369	6.97145	-1.06795	C17orf89	chromosome 17 open reading frame 89
58024	7.49e-06	1.71e-07	6.03784	6.96899	1.77143	COL7A1	collagen type VII alpha 1 chain
372020	7.45e-06	1.69e-07	6.00734	6.96442	0.775912	DYNC1I2	dynein cytoplasmic 1 intermediate chain 2
387081	7.46e-06	1.7e-07	6.00633	6.9608	1.54091	CPVL	carboxypeptidase, vitellogenic like
282022	7.47e-06	1.7e-07	6.00601	6.95963	1.13099	MAP4	microtubule associated protein 4
285040	7.79e-06	1.79e-07	6.06132	6.95829	0.958626	CTTNBP2NL	CTTNBP2 N-terminal like
109021	7.48e-06	1.7e-07	6.00492	6.95572	0.879838	PRPF31///FOSB	pre-mRNA processing factor 31///FosB proto-oncogene, AP-1 transcription factor subunit
145070	7.59e-06	1.73e-07	-6.03394	6.95514	-1.6944	CD151///METTL21A	CD151 molecule (Raph blood group)///methyltransferase like 21A
219047	7.77e-06	1.78e-07	-6.08221	6.9537	-1.25523	KCNN1	potassium calcium-activated channel subfamily N member 1
406101	8.89e-06	2.1e-07	6.22857	6.95051	1.76084	UFD1L	ubiquitin fusion degradation 1 like (yeast)
431080	9.04e-06	2.18e-07	7.29423	6.94441	2.46775	GPSM1	G-protein signaling modulator 1
2006	7.66e-06	1.75e-07	5.99716	6.92777	1.85376	UBA52///TPM2	ubiquitin A-52 residue ribosomal protein fusion product 1///tropomyosin 2 (beta)
198105	7.71e-06	1.77e-07	5.99507	6.92027	1.68141	TIMP1///TIMP1	TIMP metallopeptidase inhibitor 1///TIMP metallopeptidase inhibitor 1
81049	7.77e-06	1.78e-07	6.00914	6.9197	1.09196	MAN2A1	mannosidase alpha class 2A member 1
364059	8.19e-06	1.9e-07	6.06443	6.91014	1.92204	NIT2	nitrilase family member 2
26052	7.84e-06	1.81e-07	5.98879	6.89763	1.32854	AIMP2	aminoacyl tRNA synthetase complex interacting multifunctional protein 2
201063	8.18e-06	1.9e-07	6.02691	6.87566	1.64919	TUBB	tubulin beta class I
61055	8.12e-06	1.88e-07	5.97823	6.85965	1.19725	SPTAN1///SPTAN1	spectrin alpha, non-erythrocytic 1///spectrin alpha, non-erythrocytic 1
371065	1.25e-05	3.26e-07	-7.23386	6.84431	-1.1545	MARK2	microtubule affinity regulating kinase 2
19077	9.03e-06	2.17e-07	6.1132	6.83784	0.946286	GTF2F1	general transcription factor IIF subunit 1
304068	8.35e-06	1.94e-07	-5.96926	6.82737	-0.821223	COPA///TGOLN2	coatomer protein complex subunit alpha///trans-golgi network protein 2
185062	8.57e-06	2.02e-07	5.992	6.82557	1.49794	PAGR1	PAXIP1 associated glutamate rich protein 1
430111	8.43e-06	1.97e-07	5.98225	6.8236	0.872999	HERC1	HECT and RLD domain containing E3 ubiquitin protein ligase family member 1
11103	8.38e-06	1.95e-07	5.96793	6.82256	1.72726	TRIB1	tribbles pseudokinase 1
298033	9.97e-06	2.46e-07	-6.34928	6.81217	-0.829963	FAM129B	family with sequence similarity 129 member B
355080	9.06e-06	2.19e-07	6.06572	6.81082	0.935258	SETD2	SET domain containing 2
19072	8.47e-06	1.98e-07	5.96413	6.80891	1.0128	GDE1	glycerophosphodiester phosphodiesterase 1
330088	8.47e-06	1.98e-07	5.96378	6.80766	1.31001	SERINC3	serine incorporator 3
104036	8.48e-06	1.99e-07	5.96336	6.80614	1.25226	SDHB	succinate dehydrogenase complex iron sulfur subunit B
354034	8.66e-06	2.04e-07	6.00631	6.80316	1.16223	ADAMTS2	ADAM metallopeptidase with thrombospondin type 1 motif 2
229105	8.52e-06	2e-07	5.96141	6.79914	0.980223	UBE3A	ubiquitin protein ligase E3A
430013	8.57e-06	2.02e-07	5.9588	6.78972	1.01269	KAT6A	lysine acetyltransferase 6A
194095	8.66e-06	2.04e-07	5.95567	6.77847	1.56181	SUMO2///LOC105371814///SUMO2	small ubiquitin-like modifier 2///uncharacterized LOC105371814///small ubiquitin-like modifier 2
272035	8.71e-06	2.06e-07	5.95376	6.77161	1.06081	LOC100129550	uncharacterized LOC100129550
130064	8.99e-06	2.15e-07	6.02932	6.77043	1.27889	ZBTB26	zinc finger and BTB domain containing 26
233099	8.89e-06	2.11e-07	-5.98017	6.76437	-1.80207	VSIG1	V-set and immunoglobulin domain containing 1
79027	8.77e-06	2.07e-07	5.95151	6.76352	0.942836	ETF1	eukaryotic translation termination factor 1
160018	9.01e-06	2.16e-07	6.00912	6.75754	1.27193	NME7	NME/NM23 family member 7
263108	8.91e-06	2.12e-07	5.946	6.74373	2.0859	ABRACL	ABRA C-terminal like
313058	8.95e-06	2.14e-07	5.94299	6.73291	1.59832	CFLAR	CASP8 and FADD like apoptosis regulator
137037	9.01e-06	2.16e-07	-5.95632	6.731	-1.2763	ISOC2	isochorismatase domain containing 2
409019	9.2e-06	2.23e-07	5.96499	6.72992	2.0607	PSMD14	proteasome 26S subunit, non-ATPase 14
151039	9.02e-06	2.16e-07	5.93995	6.72196	1.80537	MRPL58	mitochondrial ribosomal protein L58
401061	9.75e-06	2.39e-07	-6.10902	6.71967	-0.700688	RRH	retinal pigment epithelium-derived rhodopsin homolog
65080	9.04e-06	2.18e-07	5.93859	6.71707	0.879788	PSMD4///PSMD4	proteasome 26S subunit, non-ATPase 4///proteasome 26S subunit, non-ATPase 4
445077	9.05e-06	2.18e-07	-5.93784	6.71437	-0.952389	CRBN///CRBN	cereblon///cereblon
472048	1.04e-05	2.61e-07	6.0146	6.70821	2.87431	SERPINE1	serpin family E member 1
473082	9.11e-06	2.2e-07	5.93556	6.7062	0.944275	PPP2R2D	protein phosphatase 2 regulatory subunit Bdelta
263034	9.92e-06	2.45e-07	6.07791	6.70162	0.795042	UBE2W	ubiquitin conjugating enzyme E2 W (putative)
24048	9.97e-06	2.47e-07	5.99032	6.69659	1.53959	ECSCR	endothelial cell surface expressed chemotaxis and apoptosis regulator
441099	9.28e-06	2.25e-07	5.94494	6.69039	1.48646	VAPB	VAMP associated protein B and C
481098	9.42e-06	2.29e-07	5.95693	6.68202	1.31255	EXOSC9	exosome component 9
39028	9.64e-06	2.35e-07	5.96712	6.66529	0.841973	ZNF20	zinc finger protein 20
313050	1.31e-05	3.46e-07	-6.71793	6.66242	-1.05604	B3GNT6	UDP-GlcNAc:betaGal beta-1,3-N-acetylglucosaminyltransferase 6
79101	9.98e-06	2.48e-07	-6.05103	6.66059	-1.28286	APH1A	aph-1 homolog A, gamma-secretase subunit
19021	9.52e-06	2.32e-07	5.92122	6.65466	1.86292	GBP1	guanylate binding protein 1
402054	9.53e-06	2.32e-07	5.9208	6.65315	1.05743	PHAX	phosphorylated adaptor for RNA export
380082	9.98e-06	2.48e-07	5.93485	6.64475	1.95324	OLFML2B	olfactomedin like 2B
256014	9.97e-06	2.47e-07	6.00989	6.64445	1.10706	HERPUD1	homocysteine inducible ER protein with ubiquitin like domain 1
185069	9.64e-06	2.35e-07	5.91701	6.63954	1.13802	RPL36AL///RPL36AL	ribosomal protein L36a like///ribosomal protein L36a like
434047	9.65e-06	2.36e-07	-5.91651	6.63775	-0.987125	FOXD2-AS1	FOXD2 antisense RNA 1 (head to head)
476075	1.07e-05	2.7e-07	-6.15237	6.63767	-1.11667	EXOC6B	exocyst complex component 6B
154080	9.75e-06	2.39e-07	-5.92878	6.63275	-1.16558	STRN3	striatin 3
457044	9.69e-06	2.37e-07	5.91501	6.63238	1.15381	TAF3	TATA-box binding protein associated factor 3
57062	9.97e-06	2.47e-07	-5.93578	6.62659	-1.33779	CRIP2	cysteine rich protein 2
466033	9.91e-06	2.44e-07	5.93942	6.62002	1.33609	IRS1	insulin receptor substrate 1
311020	9.84e-06	2.42e-07	5.91008	6.61467	1.0433	FAM222B	family with sequence similarity 222 member B
445103	9.88e-06	2.43e-07	5.90843	6.60876	1.5584	C1QB	complement C1q B chain
10062	1.07e-05	2.71e-07	5.96389	6.60549	2.22685	FCGR1A	Fc fragment of IgG receptor Ia
351097	9.91e-06	2.44e-07	5.907	6.60361	1.04109	DNAJB12	DnaJ heat shock protein family (Hsp40) member B12
498025	1.08e-05	2.74e-07	6.04487	6.59142	1.66973	PIR	pirin
275025	9.98e-06	2.48e-07	5.9025	6.58746	1.02232	LOC100506990///LINC00965///LOC283911	uncharacterized LOC100506990///long intergenic non-protein coding RNA 965///uncharacterized LOC283911
350016	1.04e-05	2.59e-07	5.92367	6.58375	1.41573	AGPAT3	1-acylglycerol-3-phosphate O-acyltransferase 3
191004	1.04e-05	2.6e-07	5.95698	6.57563	1.01906	UTS2R	urotensin 2 receptor
73056	1.02e-05	2.53e-07	5.89696	6.56757	0.894198	ESCO1	establishment of sister chromatid cohesion N-acetyltransferase 1
337007	1.05e-05	2.62e-07	5.92003	6.55137	1.1426	SSX2///SSX2B///SSX2	SSX family member 2///SSX family member 2B///SSX family member 2
187044	1.05e-05	2.64e-07	-5.91804	6.54434	-1.61552	CYP51A1	cytochrome P450 family 51 subfamily A member 1
415077	1.05e-05	2.64e-07	-5.91781	6.54351	-1.21492	QSOX1	quiescin sulfhydryl oxidase 1
368006	1.05e-05	2.64e-07	5.88562	6.52688	0.928264	SMIM13	small integral membrane protein 13
262075	1.05e-05	2.66e-07	5.88407	6.52131	1.55261	LSP1	lymphocyte-specific protein 1
130012	1.06e-05	2.67e-07	5.88332	6.51862	1.11153	BLMH///BLMH	bleomycin hydrolase///bleomycin hydrolase
40021	1.08e-05	2.75e-07	5.90625	6.50263	1.24439	ABHD2	abhydrolase domain containing 2
18111	1.2e-05	3.11e-07	-6.10893	6.49868	-0.920843	METTL7A	methyltransferase like 7A
366070	1.15e-05	2.97e-07	-6.02085	6.49454	-0.993568	MAS1	MAS1 proto-oncogene, G protein-coupled receptor
224071	1.08e-05	2.75e-07	5.87518	6.48941	1.48213	BAG3	BCL2 associated athanogene 3
309009	1.16e-05	3.01e-07	5.93441	6.48126	1.76563	WFDC1	WAP four-disulfide core domain 1
431026	1.1e-05	2.8e-07	-5.88561	6.47889	-1.18038	MAL2	mal, T-cell differentiation protein 2 (gene/pseudogene)
183041	1.13e-05	2.91e-07	-5.94439	6.47658	-1.39298	CALR	calreticulin
155107	1.25e-05	3.25e-07	6.01794	6.47416	1.04809	THRA1/BTR	uncharacterized LOC105371807
397021	1.1e-05	2.8e-07	5.86971	6.46981	2.32336	SOD2	superoxide dismutase 2, mitochondrial
451050	1.22e-05	3.18e-07	-6.07439	6.46276	-1.15152	AUNIP	aurora kinase A and ninein interacting protein
114004	1.11e-05	2.85e-07	5.88097	6.46238	0.833709	PAX1	paired box 1
46020	1.16e-05	3e-07	-5.91723	6.43714	-0.818002	ABR	active BCR-related
103032	1.14e-05	2.93e-07	5.85754	6.4262	1.18173	PITPNA	phosphatidylinositol transfer protein alpha
21022	1.22e-05	3.16e-07	-5.95952	6.41287	-1.04489	LOC284912	uncharacterized LOC284912
109049	1.15e-05	2.98e-07	5.85319	6.41061	2.04822	GADD45B	growth arrest and DNA damage inducible beta
365067	1.22e-05	3.16e-07	-5.92082	6.39514	-1.00497	LOC101929084	uncharacterized LOC101929084
329052	1.21e-05	3.15e-07	-5.9032	6.38826	-1.45973	HSPA8	heat shock protein family A (Hsp70) member 8
147053	1.5e-05	4.11e-07	-6.35103	6.37242	-1.32952	NADSYN1	NAD synthetase 1
375041	1.34e-05	3.55e-07	-6.01579	6.34342	-0.938151	LOC103344931	uncharacterized LOC103344931
479018	1.31e-05	3.44e-07	5.87837	6.34208	1.25237	CMKLR1///CMKLR1	chemerin chemokine-like receptor 1///chemerin chemokine-like receptor 1
172090	1.25e-05	3.27e-07	5.82727	6.31774	0.875999	TSC2	tuberous sclerosis 2
459007	1.3e-05	3.43e-07	5.86224	6.31653	1.3268	PYGL	phosphorylase, glycogen, liver
408002	1.47e-05	4e-07	5.93361	6.31061	2.76267	COL16A1	collagen type XVI alpha 1 chain
178019	1.26e-05	3.31e-07	5.82447	6.30774	1.0494	PTPN2	protein tyrosine phosphatase, non-receptor type 2
151048	1.41e-05	3.8e-07	-6.04718	6.30113	-1.19451	SLC39A7	solute carrier family 39 member 7
67034	1.28e-05	3.34e-07	5.82152	6.29718	2.04081	GLIPR1	GLI pathogenesis related 1
331112	1.29e-05	3.39e-07	5.8331	6.29204	2.32727	SYNPO2	synaptopodin 2
484043	1.29e-05	3.39e-07	5.81756	6.283	1.55013	CLEC2B	C-type lectin domain family 2 member B
122091	1.31e-05	3.45e-07	5.84395	6.28249	0.871592	OR5V1	olfactory receptor family 5 subfamily V member 1
59017	1.33e-05	3.52e-07	5.83821	6.28204	1.11064	MPHOSPH8	M-phase phosphoprotein 8
253087	1.3e-05	3.41e-07	-5.81653	6.27933	-0.775671	ODF3L2	outer dense fiber of sperm tails 3 like 2
244054	1.31e-05	3.44e-07	5.81384	6.26968	1.67497	DYSF	dysferlin
331070	1.33e-05	3.51e-07	5.82368	6.25855	1.20952	C19orf24///C19orf24	chromosome 19 open reading frame 24///chromosome 19 open reading frame 24
457048	1.44e-05	3.91e-07	5.87924	6.25843	1.92236	EDNRA	endothelin receptor type A
263024	1.32e-05	3.48e-07	5.81055	6.25791	0.900577	DDX51	DEAD-box helicase 51
371012	1.42e-05	3.82e-07	5.92547	6.25528	0.99596	IL15RA	interleukin 15 receptor subunit alpha
240019	1.42e-05	3.84e-07	5.88407	6.25221	1.51811	CAPN2	calpain 2
67068	1.36e-05	3.61e-07	5.83148	6.23848	1.41896	PSMB9	proteasome subunit beta 9
310045	1.5e-05	4.11e-07	5.90456	6.22668	1.23931	CAMSAP2	calmodulin regulated spectrin associated protein family member 2
319104	1.53e-05	4.21e-07	5.98951	6.22158	0.642179	DPF3	double PHD fingers 3
370104	1.37e-05	3.65e-07	5.81229	6.21807	1.75991	IGFBP6///C12orf57	insulin like growth factor binding protein 6///chromosome 12 open reading frame 57
157036	1.4e-05	3.76e-07	-5.85378	6.21633	-0.835663	KCNJ3	potassium voltage-gated channel subfamily J member 3
14044	1.36e-05	3.63e-07	5.79888	6.21618	1.61692	CD44	CD44 molecule (Indian blood group)
302067	1.4e-05	3.77e-07	5.80371	6.20781	2.1269	SORL1	sortilin related receptor 1
483095	1.38e-05	3.67e-07	5.79622	6.20667	1.35012	RBMS1	RNA binding motif single stranded interacting protein 1
67105	1.38e-05	3.68e-07	5.79533	6.20346	1.51538	DNAJC15	DnaJ heat shock protein family (Hsp40) member C15
59091	1.4e-05	3.75e-07	-5.82121	6.20223	-0.811372	TFAP4///TFAP4	transcription factor AP-4///transcription factor AP-4
8056	1.51e-05	4.13e-07	5.90331	6.20057	0.851082	VCPIP1	valosin containing protein interacting protein 1
165030	1.39e-05	3.72e-07	5.7923	6.19264	0.938704	KIAA0355	KIAA0355
468009	1.4e-05	3.74e-07	5.79083	6.18737	1.17119	AKIP1	A-kinase interacting protein 1
409096	1.41e-05	3.78e-07	-5.80281	6.1844	-0.917524	ATP7A	ATPase copper transporting alpha
235034	1.4e-05	3.76e-07	5.78957	6.18288	0.764099	WDR45	WD repeat domain 45
169016	1.41e-05	3.79e-07	5.78707	6.17396	1.51569	LINC-PINT	long intergenic non-protein coding RNA, p53 induced transcript
158005	1.45e-05	3.92e-07	5.82458	6.16516	0.83204	MRPS31P5///THSD1	mitochondrial ribosomal protein S31 pseudogene 5///thrombospondin type 1 domain containing 1
129084	1.44e-05	3.89e-07	-5.81044	6.16427	-0.972719	GALNT10	polypeptide N-acetylgalactosaminyltransferase 10
207030	1.53e-05	4.2e-07	-5.91972	6.15732	-1.00661	SGK3	serum/glucocorticoid regulated kinase family member 3
11039	1.43e-05	3.86e-07	-5.78223	6.15664	-0.908148	C1orf56	chromosome 1 open reading frame 56
266097	1.45e-05	3.93e-07	-5.79218	6.14666	-1.09412	CCDC186	coiled-coil domain containing 186
100038	1.45e-05	3.93e-07	5.77715	6.1385	1.48036	TYROBP	TYRO protein tyrosine kinase binding protein
456003	1.45e-05	3.94e-07	5.77684	6.13739	0.849551	HLA-G	major histocompatibility complex, class I, G
199103	1.53e-05	4.21e-07	5.83972	6.13419	1.29101	DEF8	differentially expressed in FDCP 8 homolog
347065	2.16e-05	6.38e-07	6.63019	6.12965	1.82674	SLC38A1	solute carrier family 38 member 1
286088	1.47e-05	4.01e-07	5.7719	6.11972	1.37151	TCEAL1	transcription elongation factor A like 1
18004	1.47e-05	4.01e-07	5.77186	6.11957	0.892487	ABCF1	ATP binding cassette subfamily F member 1
311006	1.61e-05	4.47e-07	-5.94692	6.11837	-1.03611	SHARPIN	SHANK associated RH domain interactor
319083	1.79e-05	5.06e-07	5.84403	6.10367	1.82012	CCDC88A	coiled-coil domain containing 88A
187010	1.51e-05	4.12e-07	5.76443	6.09307	1.46904	TRIM24	tripartite motif containing 24
410005	1.51e-05	4.12e-07	5.7643	6.09257	0.971433	ATP5C1	ATP synthase, H+ transporting, mitochondrial F1 complex, gamma polypeptide 1
441046	1.53e-05	4.22e-07	-5.75821	6.07082	-0.794075	SIX3	SIX homeobox 3
473094	1.84e-05	5.23e-07	-6.10302	6.06312	-1.04277	TMEM63B	transmembrane protein 63B
107045	1.55e-05	4.29e-07	5.7682	6.06158	1.4092	TCEAL1	transcription elongation factor A like 1
426099	1.59e-05	4.39e-07	5.79307	6.05491	1.75721	TATDN1	TatD DNase domain containing 1
212103	1.82e-05	5.17e-07	5.88061	6.04631	1.3486	TIGD1	tigger transposable element derived 1
354048	1.6e-05	4.43e-07	5.79046	6.04578	0.896748	CLPX	caseinolytic mitochondrial matrix peptidase chaperone subunit
59010	1.6e-05	4.44e-07	5.78982	6.04353	1.24713	TAMM41	TAM41 mitochondrial translocator assembly and maintenance homolog
291044	1.65e-05	4.6e-07	5.78009	6.02923	1.29222	SLC25A3	solute carrier family 25 member 3
19112	1.59e-05	4.41e-07	5.74579	6.0265	1.24424	TNIP1	TNFAIP3 interacting protein 1
229099	1.65e-05	4.61e-07	-5.81385	6.02616	-1.00551	KRT72	keratin 72
151060	1.59e-05	4.41e-07	-5.74563	6.02591	-0.84279	PTK2B	protein tyrosine kinase 2 beta
291036	1.6e-05	4.42e-07	5.74519	6.02436	1.1473	AKTIP///AKTIP	AKT interacting protein///AKT interacting protein
60076	1.61e-05	4.48e-07	5.74139	6.01079	0.908882	ANKRD49	ankyrin repeat domain 49
454006	1.72e-05	4.83e-07	5.80055	5.99938	1.59905	TRPA1	transient receptor potential cation channel subfamily A member 1
227064	1.63e-05	4.54e-07	5.73799	5.99866	1.31366	SNRK	SNF related kinase
130041	1.63e-05	4.54e-07	5.73795	5.99851	1.66801	CD163	CD163 molecule
99048	1.64e-05	4.56e-07	5.73698	5.99507	1.49853	GYPC	glycophorin C (Gerbich blood group)
443012	2.1e-05	6.19e-07	-6.25566	5.99103	-0.79136	LRRC3	leucine rich repeat containing 3
28095	1.65e-05	4.59e-07	5.73522	5.98877	1.13021	MCM5	minichromosome maintenance complex component 5
406064	1.65e-05	4.62e-07	-5.74755	5.98836	-0.750665	FAM41AY2///FAM41AY1	family with sequence similarity 41 member A, Y-linked 2///family with sequence similarity 41 member A, Y-linked 1
18034	1.65e-05	4.6e-07	5.73434	5.98564	1.12441	RRAGC	Ras related GTP binding C
37104	1.65e-05	4.6e-07	5.73414	5.98493	1.1021	AKR1B1	aldo-keto reductase family 1 member B
154012	2.01e-05	5.84e-07	5.91571	5.98019	1.13537	CASZ1	castor zinc finger 1
415088	1.67e-05	4.69e-07	-5.74385	5.97525	-0.745537	SARM1	sterile alpha and TIR motif containing 1
387004	1.67e-05	4.68e-07	5.72939	5.96799	0.862699	NCKAP1L	NCK associated protein 1 like
388107	2.02e-05	5.9e-07	5.88749	5.96088	2.30762	UBE2Q2	ubiquitin conjugating enzyme E2 Q2
72041	1.68e-05	4.73e-07	5.72667	5.9583	1.85626	LAPTM5	lysosomal protein transmembrane 5
195047	1.9e-05	5.44e-07	-5.93783	5.9515	-0.898394	ATP5J	ATP synthase, H+ transporting, mitochondrial Fo complex subunit F6
428047	1.71e-05	4.81e-07	5.72213	5.94208	1.4782	SPARC	secreted protein acidic and cysteine rich
392092	1.74e-05	4.9e-07	-5.7468	5.94007	-1.89337	CYP4F12	cytochrome P450 family 4 subfamily F member 12
395063	1.89e-05	5.4e-07	-5.8903	5.93349	-0.822766	FATE1	fetal and adult testis expressed 1
324105	1.93e-05	5.53e-07	5.8388	5.92499	1.07649	HCRTR2	hypocretin receptor 2
435007	2.12e-05	6.25e-07	6.11913	5.92281	1.24566	EIF4B	eukaryotic translation initiation factor 4B
479092	1.94e-05	5.59e-07	5.79558	5.91867	1.25032	UBE2G1	ubiquitin conjugating enzyme E2 G1
201081	1.78e-05	5.02e-07	5.73996	5.91603	1.19432	MSANTD3	Myb/SANT DNA binding domain containing 3
208001	1.9e-05	5.44e-07	-5.86515	5.91446	-0.749461	RNPS1	RNA binding protein with serine rich domain 1
123099	1.83e-05	5.19e-07	5.74659	5.91231	1.22476	INTS8	integrator complex subunit 8
380051	2.72e-05	8.65e-07	-6.78745	5.89874	-1.38356	RASSF6	Ras association domain family member 6
390102	2.26e-05	6.78e-07	5.84556	5.88078	1.75424	RIN3	Ras and Rab interactor 3
101056	2.34e-05	7.09e-07	6.20709	5.87416	1.95217	RPS23	ribosomal protein S23
324079	1.84e-05	5.22e-07	5.71428	5.87053	1.15215	LRPPRC	leucine rich pentatricopeptide repeat containing
174016	2.61e-05	8.17e-07	-6.52895	5.86698	-1.26804	USP22	ubiquitin specific peptidase 22
352060	1.85e-05	5.25e-07	5.71277	5.86519	1.03592	LARS2	leucyl-tRNA synthetase 2, mitochondrial
413030	2.06e-05	6.05e-07	5.85644	5.85825	1.17282	GRAPL	GRB2 related adaptor protein like
156027	1.91e-05	5.47e-07	-5.7479	5.84882	-0.771793	CXorf40B///CXorf40A	chromosome X open reading frame 40B///chromosome X open reading frame 40A
375086	1.99e-05	5.77e-07	5.75009	5.84734	1.89357	ATP1B3	ATPase Na+/K+ transporting subunit beta 3
6045	1.98e-05	5.74e-07	5.80739	5.84106	0.865823	CECR2	CECR2, histone acetyl-lysine reader
8088	1.88e-05	5.35e-07	5.69305	5.83848	1.10407	TAF9///RAD17	TATA-box binding protein associated factor 9///RAD17 checkpoint clamp loader component
92052	1.88e-05	5.36e-07	5.69254	5.83665	2.05904	ANXA1	annexin A1
269005	1.95e-05	5.6e-07	-5.75836	5.83518	-2.17193	UNC5B-AS1	UNC5B antisense RNA 1
122064	2.1e-05	6.19e-07	-5.87324	5.81249	-1.9833	MACC1	metastasis associated in colon cancer 1
324075	2.05e-05	5.97e-07	-5.8161	5.81246	-1.45546	CEBPD	CCAAT/enhancer binding protein delta
439034	1.94e-05	5.59e-07	5.71005	5.81088	1.59728	HBEGF	heparin binding EGF like growth factor
300105	1.94e-05	5.56e-07	5.69698	5.8093	1.57135	MANEAL	mannosidase endo-alpha like
382089	2.18e-05	6.47e-07	5.81375	5.80324	0.825812	WDR48	WD repeat domain 48
380026	1.97e-05	5.7e-07	5.7204	5.80107	1.16882	DTNBP1	dystrobrevin binding protein 1
370031	1.96e-05	5.66e-07	5.69186	5.79121	1.04639	TBC1D22A	TBC1 domain family member 22A
60090	1.95e-05	5.62e-07	5.67965	5.79075	0.829087	TSPAN33	tetraspanin 33
58017	1.95e-05	5.64e-07	5.67864	5.78716	0.809512	BCAS2	breast carcinoma amplified sequence 2
123006	1.96e-05	5.67e-07	5.67698	5.78125	0.781856	DMAP1	DNA methyltransferase 1 associated protein 1
373073	2.01e-05	5.86e-07	5.68236	5.77822	1.92323	CREM	cAMP responsive element modulator
396032	1.99e-05	5.76e-07	5.68699	5.77396	0.796559	SDHAF2///EEF2	succinate dehydrogenase complex assembly factor 2///eukaryotic translation elongation factor 2
397009	1.99e-05	5.76e-07	5.67271	5.76606	0.99706	ZNF302	zinc finger protein 302
263107	1.99e-05	5.78e-07	5.67187	5.76305	0.837005	AAK1	AP2 associated kinase 1
187048	2.06e-05	6.02e-07	5.6895	5.759	2.15057	ATF3	activating transcription factor 3
46103	2.1e-05	6.19e-07	5.71302	5.74765	1.20949	RIMBP3	RIMS binding protein 3
224012	2.02e-05	5.9e-07	5.66629	5.74323	0.801662	HSPBAP1	HSPB1 associated protein 1
34020	2.02e-05	5.9e-07	5.66611	5.74257	0.762606	EIF3D	eukaryotic translation initiation factor 3 subunit D
410097	2.16e-05	6.41e-07	5.70352	5.71484	1.28514	SLC11A2	solute carrier family 11 member 2
57073	2.08e-05	6.1e-07	5.65716	5.71073	1.10794	RRAGA	Ras related GTP binding A
156106	2.19e-05	6.5e-07	-5.73354	5.69926	-1.27791	GALNT3	polypeptide N-acetylgalactosaminyltransferase 3
34081	2.13e-05	6.3e-07	5.67703	5.69494	0.781112	SNX19	sorting nexin 19
397058	2.79e-05	8.94e-07	-6.227	5.68764	-0.987363	SEMA5A	semaphorin 5A
394039	2.22e-05	6.65e-07	-5.74523	5.68664	-1.21326	PDE4C	phosphodiesterase 4C
373105	2.14e-05	6.32e-07	5.6475	5.67639	1.0844	TSN	translin
31043	2.41e-05	7.35e-07	-5.87114	5.66892	-0.833662	CHD9	chromodomain helicase DNA binding protein 9
177103	2.15e-05	6.38e-07	5.64482	5.66686	0.938842	TAOK1	TAO kinase 1
135099	2.2e-05	6.56e-07	5.6808	5.66301	1.58176	LOC101928446	uncharacterized LOC101928446
375106	2.21e-05	6.58e-07	5.63638	5.6369	0.818746	WDR26	WD repeat domain 26
457077	2.71e-05	8.6e-07	5.79725	5.63232	1.25449	AUH	AU RNA binding methylglutaconyl-CoA hydratase
372003	2.25e-05	6.74e-07	5.65816	5.62872	1.15133	LUC7L	LUC7 like
355041	2.25e-05	6.73e-07	5.64391	5.6218	1.03559	ARIH1	ariadne RBR E3 ubiquitin protein ligase 1
409085	2.66e-05	8.38e-07	5.75858	5.61202	2.40658	HMGN1///HMGN1	high mobility group nucleosome binding domain 1///high mobility group nucleosome binding domain 1
331069	2.31e-05	6.96e-07	-5.66435	5.60572	-0.870873	AAGAB	alpha- and gamma-adaptin binding protein
34102	2.45e-05	7.53e-07	5.72825	5.59397	0.630657	TMEM206	transmembrane protein 206
61069	2.29e-05	6.89e-07	5.62385	5.59239	0.862604	SRP14	signal recognition particle 14
347038	2.29e-05	6.89e-07	-5.62355	5.59132	-0.992824	C19orf70///RPS17	chromosome 19 open reading frame 70///ribosomal protein S17
185042	2.29e-05	6.9e-07	5.62325	5.59025	1.39454	PIGS	phosphatidylinositol glycan anchor biosynthesis class S
244097	2.34e-05	7.09e-07	5.6593	5.58812	1.2779	NXT2	nuclear transport factor 2 like export factor 2
408096	2.58e-05	8.02e-07	5.72932	5.58459	1.88729	GYG1	glycogenin 1
95046	2.31e-05	6.98e-07	5.62017	5.57932	0.853699	AMBRA1	autophagy and beclin 1 regulator 1
305095	2.31e-05	6.99e-07	5.61985	5.57818	1.53601	COL6A2	collagen type VI alpha 2 chain
429018	2.61e-05	8.17e-07	5.74425	5.57543	1.85487	ARID4B	AT-rich interaction domain 4B
415100	2.36e-05	7.17e-07	5.64084	5.56803	1.60842	CCDC59	coiled-coil domain containing 59
374010	2.71e-05	8.62e-07	5.77267	5.5676	0.9331	PIK3IP1-AS1	PIK3IP1 antisense RNA 1 (head to head)
429033	2.53e-05	7.84e-07	5.69778	5.56599	1.47931	C11orf1	chromosome 11 open reading frame 1
333002	2.35e-05	7.13e-07	5.6142	5.55812	1.055	ZFP91	ZFP91 zinc finger protein
434090	2.47e-05	7.6e-07	5.67161	5.55675	1.12022	FAM63B	family with sequence similarity 63 member B
187028	2.39e-05	7.28e-07	5.62239	5.54585	0.85359	PCBP1	poly(rC) binding protein 1
331061	2.6e-05	8.11e-07	5.70655	5.54195	0.932756	TBKBP1	TBK1 binding protein 1
269010	2.57e-05	7.98e-07	5.62615	5.54052	1.15513	ENTPD1	ectonucleoside triphosphate diphosphohydrolase 1
387025	2.4e-05	7.33e-07	5.6203	5.53848	1.10587	CFAP97	cilia and flagella associated protein 97
436027	2.39e-05	7.28e-07	5.60862	5.53831	1.01876	OLFM1	olfactomedin 1
361020	2.39e-05	7.29e-07	5.6081	5.53648	0.994228	NSA2	NSA2, ribosome biogenesis homolog
267076	2.39e-05	7.29e-07	5.60806	5.53634	0.744384	ZNF18	zinc finger protein 18
412076	2.56e-05	7.94e-07	5.65927	5.53627	1.97188	GZMB	granzyme B
130048	2.45e-05	7.53e-07	5.64246	5.52954	1.23318	SKIV2L	Ski2 like RNA helicase
465063	2.64e-05	8.28e-07	-5.74052	5.52151	-0.662102	BMP8A	bone morphogenetic protein 8a
311077	2.43e-05	7.44e-07	-5.60273	5.51741	-0.813769	GRIK2	glutamate ionotropic receptor kainate type subunit 2
492076	2.43e-05	7.44e-07	5.60254	5.51675	1.08115	RAB9A	RAB9A, member RAS oncogene family
485099	2.43e-05	7.44e-07	5.60239	5.51622	1.55119	HLA-DRB3	major histocompatibility complex, class II, DR beta 3
355011	2.47e-05	7.62e-07	-5.62415	5.50954	-1.29024	RPL7	ribosomal protein L7
142109	2.44e-05	7.5e-07	5.6003	5.50878	2.22413	CXCL10	C-X-C motif chemokine ligand 10
184077	2.64e-05	8.31e-07	5.69935	5.49733	1.29382	MINA	MYC induced nuclear antigen
373032	2.59e-05	8.07e-07	5.60812	5.4969	1.81075	MCTS1	MCTS1, re-initiation and release factor
305022	2.53e-05	7.84e-07	5.60196	5.49474	1.85801	NPM1	nucleophosmin
305108	2.5e-05	7.69e-07	5.60705	5.49178	1.07947	LRRK1	leucine rich repeat kinase 1
226014	3.06e-05	1.01e-06	-6.037	5.48878	-1.47083	FBXW5///LSM7	F-box and WD repeat domain containing 5///LSM7 homolog, U6 small nuclear RNA and mRNA degradation associated
408102	2.69e-05	8.52e-07	5.71149	5.4829	0.808152	ADSS	adenylosuccinate synthase
72012	2.53e-05	7.83e-07	-5.61629	5.48202	-1.91756	KLF2	Kruppel like factor 2
120067	2.5e-05	7.72e-07	-5.59229	5.4804	-1.02539	HOOK2	hook microtubule tethering protein 2
370032	2.74e-05	8.72e-07	5.70456	5.48012	1.42831	EXPH5	exophilin 5
147026	2.65e-05	8.34e-07	5.69846	5.47604	0.649921	CDH23	cadherin-related 23
118108	2.64e-05	8.27e-07	5.64748	5.47412	1.27803	ITPKC	inositol-trisphosphate 3-kinase C
312087	2.64e-05	8.3e-07	5.64659	5.47109	1.49357	KHDRBS3	KH RNA binding domain containing, signal transduction associated 3
132003	2.79e-05	8.94e-07	5.67809	5.47008	1.30153	C1orf162	chromosome 1 open reading frame 162
446018	2.54e-05	7.86e-07	5.58742	5.46312	1.06688	RNF130	ring finger protein 130
422075	2.54e-05	7.87e-07	5.58727	5.4626	1.19951	H3F3A///DACH1	H3 histone, family 3A///dachshund family transcription factor 1
445034	2.64e-05	8.3e-07	5.61507	5.45456	1.05125	SETX	senataxin
412024	2.58e-05	8.04e-07	5.59492	5.44903	0.986174	LOC101928524	uncharacterized LOC101928524
326090	2.57e-05	8e-07	5.58279	5.44671	1.08734	APMAP	adipocyte plasma membrane associated protein
298069	2.68e-05	8.45e-07	5.62547	5.44539	0.989286	TP53BP1///PGK1	tumor protein p53 binding protein 1///phosphoglycerate kinase 1
349108	2.9e-05	9.43e-07	5.66255	5.44407	1.32991	USP27X	ubiquitin specific peptidase 27, X-linked
19107	2.58e-05	8.05e-07	5.58079	5.43962	1.41919	TMED5	transmembrane p24 trafficking protein 5
280057	3.71e-05	1.28e-06	-6.34575	5.42972	-0.921199	SP1	Sp1 transcription factor
454061	2.72e-05	8.66e-07	-5.66897	5.42918	-1.12639	CDIPT	CDP-diacylglycerol--inositol 3-phosphatidyltransferase
454071	2.69e-05	8.52e-07	5.60754	5.42842	1.06616	SERPINE2	serpin family E member 2
469062	2.64e-05	8.27e-07	5.58719	5.42181	2.14628	RPL13A	ribosomal protein L13a
372073	2.62e-05	8.21e-07	5.57565	5.42141	1.25282	NDUFB1	NADH:ubiquinone oxidoreductase subunit B1
225105	2.66e-05	8.38e-07	5.56988	5.40097	1.10805	HARS	histidyl-tRNA synthetase
49077	2.69e-05	8.49e-07	5.56638	5.38856	1.21504	CENPBD1P1	CENPB DNA-binding domains containing 1 pseudogene 1
354003	2.74e-05	8.73e-07	5.60072	5.38444	1.06683	ASAP1	ArfGAP with SH3 domain, ankyrin repeat and PH domain 1
351051	2.7e-05	8.54e-07	-5.56451	5.38194	-0.736582	TRIM29	tripartite motif containing 29
35024	2.74e-05	8.76e-07	-5.59992	5.38165	-1.27583	SLC16A5	solute carrier family 16 member 5
187070	3.28e-05	1.11e-06	5.69714	5.38087	1.94229	PITPNA	phosphatidylinositol transfer protein alpha
190022	2.7e-05	8.58e-07	-5.56338	5.37796	-1.38082	PPARG	peroxisome proliferator activated receptor gamma
118039	2.75e-05	8.8e-07	5.55629	5.35284	0.990437	PSMF1	proteasome inhibitor subunit 1
303112	3.01e-05	9.89e-07	5.64865	5.34875	1.27237	COL4A1	collagen type IV alpha 1 chain
362080	2.78e-05	8.9e-07	5.55318	5.34185	1.10861	SH3BGRL	SH3 domain binding glutamate rich protein like
73075	2.83e-05	9.13e-07	5.58836	5.34151	0.68343	CAD	carbamoyl-phosphate synthetase 2, aspartate transcarbamylase, and dihydroorotase
262076	3.06e-05	1.01e-06	5.66134	5.33719	1.44693	STIP1	stress induced phosphoprotein 1
338013	2.8e-05	9e-07	5.55012	5.33101	0.770619	ATP6AP1///ATP6AP1	ATPase H+ transporting accessory protein 1///ATPase H+ transporting accessory protein 1
229092	2.83e-05	9.14e-07	5.54605	5.31659	0.907774	RPL31P11///RPL31	ribosomal protein L31 pseudogene 11///ribosomal protein L31
408039	3.07e-05	1.02e-06	-5.70087	5.31616	-0.926357	MEF2B///BORCS8///RFXANK///BORCS8-MEF2B	myocyte enhancer factor 2B///BLOC-1 related complex subunit 8///regulatory factor X associated ankyrin containing protein///BORCS8-MEF2B readthrough
102020	2.92e-05	9.55e-07	5.5908	5.30593	1.29363	MRPL42	mitochondrial ribosomal protein L42
472019	2.89e-05	9.39e-07	5.56591	5.30586	0.933779	GRK6	G protein-coupled receptor kinase 6
16031	2.87e-05	9.28e-07	5.54164	5.301	1.50075	SKAP2	src kinase associated phosphoprotein 2
440023	2.88e-05	9.36e-07	5.53946	5.29328	0.919902	INTS2	integrator complex subunit 2
393045	2.89e-05	9.4e-07	5.53809	5.28843	1.38326	PPIB	peptidylprolyl isomerase B
393086	3.02e-05	9.93e-07	5.57969	5.28773	1.21974	MRM2	mitochondrial rRNA methyltransferase 2
502001	2.92e-05	9.54e-07	5.54757	5.28243	1.22482	PCM1	pericentriolar material 1
400107	2.97e-05	9.73e-07	5.57041	5.27924	1.67494	PLK3	polo like kinase 3
301025	2.92e-05	9.54e-07	5.53425	5.27485	1.50322	NREP	neuronal regeneration related protein
25068	2.92e-05	9.55e-07	5.53397	5.27386	0.832499	ZNF581	zinc finger protein 581
436102	2.92e-05	9.55e-07	5.53388	5.27357	1.30501	SDC2	syndecan 2
267098	2.96e-05	9.67e-07	-5.53039	5.26122	-0.683022	SNX27	sorting nexin family member 27
30079	2.96e-05	9.71e-07	5.52923	5.25713	0.806252	UBE2D2	ubiquitin conjugating enzyme E2 D2
401039	3.17e-05	1.06e-06	-5.64803	5.25475	-0.680407	HTR2C	5-hydroxytryptamine receptor 2C
132030	3e-05	9.84e-07	5.52569	5.24458	1.1187	RBM17	RNA binding motif protein 17
78003	4.08e-05	1.44e-06	-6.1064	5.2386	-0.87814	GNRH1	gonadotropin releasing hormone 1
366100	3.03e-05	1e-06	5.52119	5.2287	1.06702	TBCA///TBCA	tubulin folding cofactor A///tubulin folding cofactor A
130082	3.03e-05	1e-06	5.52098	5.22797	1.49329	PDLIM4	PDZ and LIM domain 4
442107	3.19e-05	1.07e-06	5.60758	5.22233	0.98136	HADHA	hydroxyacyl-CoA dehydrogenase/3-ketoacyl-CoA thiolase/enoyl-CoA hydratase (trifunctional protein), alpha subunit
134090	3.05e-05	1.01e-06	-5.51926	5.22187	-1.24865	DPY19L2P3	DPY19L2 pseudogene 3
67051	3.05e-05	1.01e-06	-5.51917	5.22154	-0.948377	PAQR4	progestin and adipoQ receptor family member 4
382063	4.29e-05	1.52e-06	-5.85582	5.21314	-2.11534	MED18	mediator complex subunit 18
76112	3.18e-05	1.06e-06	5.57606	5.21021	1.01843	SSC4D	scavenger receptor cysteine rich family member with 4 domains
25026	3.12e-05	1.04e-06	5.53829	5.20943	0.772345	ZDHHC23	zinc finger DHHC-type containing 23
392019	3.11e-05	1.03e-06	5.51304	5.1999	0.898668	TTL	tubulin tyrosine ligase
32047	3.12e-05	1.04e-06	5.51097	5.19257	0.988954	DNTTIP1	deoxynucleotidyltransferase terminal interacting protein 1
250021	3.2e-05	1.07e-06	5.55781	5.19231	0.817159	LOC100128239	uncharacterized LOC100128239
269052	3.17e-05	1.06e-06	5.50629	5.17606	1.0593	GPAT3	glycerol-3-phosphate acyltransferase 3
288037	3.43e-05	1.17e-06	5.6184	5.1748	0.8524	LOC107987020	uncharacterized LOC107987020
370017	3.19e-05	1.07e-06	-5.51622	5.17233	-1.75294	MOV10	Mov10 RISC complex RNA helicase
165111	3.19e-05	1.07e-06	5.51556	5.17003	1.09928	GABRR1	gamma-aminobutyric acid type A receptor rho1 subunit
125055	3.18e-05	1.06e-06	5.50408	5.16826	0.950438	RPL23A	ribosomal protein L23a
93030	3.19e-05	1.07e-06	5.50362	5.16661	0.960034	NACA	nascent polypeptide-associated complex alpha subunit
388027	3.21e-05	1.08e-06	5.51401	5.16459	1.12665	CD34	CD34 molecule
266047	3.48e-05	1.19e-06	5.57685	5.15946	1.4527	MMP2	matrix metallopeptidase 2
132038	3.28e-05	1.11e-06	5.53414	5.15352	0.950124	ZNF354B	zinc finger protein 354B
176066	3.22e-05	1.08e-06	5.49981	5.15317	1.62371	CHN1///CHN1	chimerin 1///chimerin 1
352098	3.22e-05	1.08e-06	5.49939	5.1517	1.45931	DGCR6L///DGCR6	DiGeorge syndrome critical region gene 6-like///DiGeorge syndrome critical region gene 6
388062	3.4e-05	1.16e-06	-5.58528	5.14728	-0.891216	ABCC8	ATP binding cassette subfamily C member 8
370004	3.26e-05	1.09e-06	5.4962	5.14041	0.814721	FEM1C	fem-1 homolog C
104111	3.28e-05	1.1e-06	5.49382	5.13204	1.02905	LGALS8///LGALS8	galectin 8///galectin 8
163097	3.29e-05	1.11e-06	-5.49254	5.12749	-0.957773	THSD4	thrombospondin type 1 domain containing 4
4096	3.31e-05	1.12e-06	5.49055	5.12048	1.09782	TMEM2	transmembrane protein 2
459073	3.32e-05	1.12e-06	5.49001	5.11857	0.886663	ANKHD1	ankyrin repeat and KH domain containing 1
372059	3.34e-05	1.13e-06	5.49992	5.11515	1.04917	ZNF84	zinc finger protein 84
311015	3.34e-05	1.13e-06	-5.48808	5.11179	-1.02595	MPDU1	mannose-P-dolichol utilization defect 1
480018	3.92e-05	1.37e-06	5.61073	5.10761	1.50603	B4GALT4	beta-1,4-galactosyltransferase 4
59094	3.35e-05	1.14e-06	5.48609	5.10476	1.40899	SNX2	sorting nexin 2
300066	3.86e-05	1.34e-06	-5.66031	5.10078	-0.816189	LOC105371184	uncharacterized LOC105371184
205098	3.39e-05	1.15e-06	5.48204	5.09047	1.15376	KIAA0922	KIAA0922
312006	4.02e-05	1.41e-06	5.60219	5.08004	1.21371	ZNF629	zinc finger protein 629
178036	3.45e-05	1.18e-06	-5.48946	5.07847	-1.07288	ATL3	atlastin GTPase 3
353015	3.43e-05	1.17e-06	-5.47811	5.0766	-1.83717	SLC7A8///SLC7A8	solute carrier family 7 member 8///solute carrier family 7 member 8
278011	3.75e-05	1.3e-06	5.50405	5.07584	1.99823	PILRA	paired immunoglobin like type 2 receptor alpha
79071	3.46e-05	1.18e-06	5.48869	5.07577	1.26721	TGFBR1	transforming growth factor beta receptor 1
458077	4.21e-05	1.49e-06	5.60696	5.06449	1.32313	OPTN	optineurin
499103	3.72e-05	1.28e-06	5.59042	5.0641	1.0674	C10orf10	chromosome 10 open reading frame 10
254055	3.72e-05	1.28e-06	5.522	5.0456	1.05448	EGLN1	egl-9 family hypoxia inducible factor 1
319007	3.53e-05	1.21e-06	5.46881	5.04382	1.14503	TMEM176B	transmembrane protein 176B
60068	3.66e-05	1.26e-06	5.47006	5.03186	0.785524	ZMYM2	zinc finger MYM-type containing 2
245087	3.99e-05	1.4e-06	5.58465	5.03075	1.35333	ZNF33B///ZNF33A	zinc finger protein 33B///zinc finger protein 33A
355066	4.2e-05	1.48e-06	5.58653	5.02951	1.30222	ATAD1	ATPase family, AAA domain containing 1
437071	3.81e-05	1.33e-06	5.49758	5.02842	1.63529	FGL2	fibrinogen like 2
396037	3.59e-05	1.23e-06	5.46392	5.02659	1.04703	HIST1H3C	histone cluster 1, H3c
380006	3.6e-05	1.23e-06	5.46305	5.02349	0.855308	RPL28///RPL24	ribosomal protein L28///ribosomal protein L24
73018	4.1e-05	1.44e-06	-5.68668	5.02192	-1.67414	AP1S1	adaptor related protein complex 1 sigma 1 subunit
273109	3.63e-05	1.25e-06	5.46059	5.01485	0.821109	RPL34	ribosomal protein L34
367071	3.64e-05	1.25e-06	5.4594	5.01064	1.15758	ZNF706	zinc finger protein 706
436108	3.64e-05	1.25e-06	5.45919	5.0099	1.68986	DECR1	2,4-dienoyl-CoA reductase 1, mitochondrial
238003	3.66e-05	1.26e-06	5.4576	5.00432	1.09505	LRP11	LDL receptor related protein 11
194031	4.91e-05	1.8e-06	-5.97035	5.00431	-1.27782	AP2A2	adaptor related protein complex 2 alpha 2 subunit
20001	3.75e-05	1.3e-06	5.50295	5.00373	0.84876	FAM210A	family with sequence similarity 210 member A
134052	3.75e-05	1.3e-06	5.46183	5.00305	0.921893	MANBA	mannosidase beta
319026	3.82e-05	1.33e-06	5.52805	5.00131	0.921589	SMARCAL1	SWI/SNF related, matrix associated, actin dependent regulator of chromatin, subfamily a like 1
397002	3.81e-05	1.33e-06	5.48336	4.99856	0.904875	S100PBP	S100P binding protein
352014	3.81e-05	1.32e-06	-5.5136	4.997	-0.949008	SLC35D1	solute carrier family 35 member D1
429004	3.84e-05	1.34e-06	5.49493	4.99655	0.922134	MBIP	MAP3K12 binding inhibitory protein 1
350071	3.72e-05	1.28e-06	5.46495	4.99259	1.12247	STAT5A	signal transducer and activator of transcription 5A
138084	4.27e-05	1.52e-06	-5.69772	4.98865	-1.08766	BRD4	bromodomain containing 4
312059	3.76e-05	1.3e-06	5.44783	4.96991	0.881029	CREBL2	cAMP responsive element binding protein like 2
347037	3.95e-05	1.38e-06	5.51678	4.96317	0.832703	ACOT13	acyl-CoA thioesterase 13
56023	3.86e-05	1.35e-06	5.43873	4.93785	1.4305	COX14	COX14, cytochrome c oxidase assembly factor
98016	4.02e-05	1.41e-06	-5.49457	4.93212	-1.67471	SDR16C5	short chain dehydrogenase/reductase family 16C, member 5
196038	4.03e-05	1.42e-06	5.45094	4.92639	3.35281	CXCL8	C-X-C motif chemokine ligand 8
82086	5.13e-05	1.89e-06	5.53345	4.92353	2.18806	PCBP3	poly(rC) binding protein 3
458028	3.94e-05	1.38e-06	5.43305	4.91785	1.04893	KPNA4	karyopherin subunit alpha 4
178008	4.33e-05	1.54e-06	5.55527	4.91439	0.675909	CDK15	cyclin dependent kinase 15
486097	3.96e-05	1.39e-06	5.43111	4.91105	0.99035	AP1M1	adaptor related protein complex 1 mu 1 subunit
36073	3.97e-05	1.39e-06	5.43025	4.90801	0.891334	POLDIP2	DNA polymerase delta interacting protein 2
282027	4.16e-05	1.47e-06	-5.49982	4.9058	-0.686	CYP1A2	cytochrome P450 family 1 subfamily A member 2
11089	4.03e-05	1.42e-06	5.45052	4.90381	1.18509	WDR74	WD repeat domain 74
392064	4.01e-05	1.41e-06	5.42711	4.89698	1.14256	MOB3A///MOB3A	MOB kinase activator 3A///MOB kinase activator 3A
248091	4.02e-05	1.41e-06	5.42591	4.89274	1.07223	RPAP3	RNA polymerase II associated protein 3
142091	4.08e-05	1.44e-06	5.42141	4.87692	1.10296	RUVBL2	RuvB like AAA ATPase 2
291084	5.25e-05	1.95e-06	5.61698	4.86785	2.24901	RBM34///RBM34	RNA binding motif protein 34///RNA binding motif protein 34
351062	4.34e-05	1.55e-06	-5.50031	4.86193	-0.922845	TMEM38A	transmembrane protein 38A
444096	4.41e-05	1.58e-06	5.49411	4.86046	0.731291	DUSP15	dual specificity phosphatase 15
247088	6.95e-05	2.77e-06	-6.601	4.85461	-1.30435	ZNF264	zinc finger protein 264
268017	4.31e-05	1.53e-06	-5.47148	4.8535	-1.37566	SMPDL3A	sphingomyelin phosphodiesterase acid like 3A
120031	4.22e-05	1.49e-06	-5.42278	4.84511	-1.22938	RAB10	RAB10, member RAS oncogene family
185104	4.23e-05	1.5e-06	5.40956	4.83528	1.02978	ESYT2	extended synaptotagmin 2
289002	4.25e-05	1.51e-06	5.40767	4.82861	1.10505	RAP1B	RAP1B, member of RAS oncogene family
269036	4.3e-05	1.53e-06	5.40425	4.8166	1.35086	ITGAM	integrin subunit alpha M
190093	4.43e-05	1.59e-06	-5.44637	4.80969	-1.09225	EIF2AK2	eukaryotic translation initiation factor 2 alpha kinase 2
270028	4.32e-05	1.54e-06	-5.40171	4.80769	-1.0177	C14orf178	chromosome 14 open reading frame 178
457070	4.39e-05	1.57e-06	5.40887	4.79654	0.902938	MAPKAPK5	mitogen-activated protein kinase-activated protein kinase 5
313045	4.41e-05	1.58e-06	-5.39454	4.78249	-0.720156	SLC4A9	solute carrier family 4 member 9
324091	4.42e-05	1.58e-06	5.3939	4.78025	1.20086	POLR2K	RNA polymerase II subunit K
138087	4.66e-05	1.68e-06	-5.47571	4.77945	-0.983216	SLPI	secretory leukocyte peptidase inhibitor
464062	4.51e-05	1.62e-06	5.38782	4.7589	0.847572	RPL6	ribosomal protein L6
185071	5.06e-05	1.86e-06	-5.5391	4.75363	-0.867406	CASP8	caspase 8
481049	4.54e-05	1.63e-06	5.38558	4.75105	2.37193	MGP	matrix Gla protein
193055	4.55e-05	1.64e-06	5.38476	4.74815	0.915863	CAND1	cullin associated and neddylation dissociated 1
284005	4.58e-05	1.65e-06	5.39477	4.74733	0.933499	GEMIN5	gem nuclear organelle associated protein 5
134025	4.85e-05	1.76e-06	5.43169	4.73845	1.46037	NFATC1	nuclear factor of activated T-cells 1
99016	4.61e-05	1.66e-06	5.38057	4.73347	1.12122	USF2///FAM83H-AS1	upstream transcription factor 2, c-fos interacting///FAM83H antisense RNA 1 (head to head)
296047	4.64e-05	1.67e-06	5.37857	4.72645	1.08288	DUS1L	dihydrouridine synthase 1 like
20050	7.62e-05	3.1e-06	-6.4234	4.71892	-1.0457	DCAF16	DDB1 and CUL4 associated factor 16
350068	7.03e-05	2.81e-06	-6.17696	4.71808	-0.976266	FAM117B	family with sequence similarity 117 member B
151028	4.68e-05	1.69e-06	5.3757	4.71636	0.736959	TPCN1	two pore segment channel 1
92046	4.69e-05	1.7e-06	5.37524	4.71477	0.927297	FXR1	FMR1 autosomal homolog 1
160091	4.69e-05	1.7e-06	5.37515	4.71444	1.05081	TUBA1C///TUBA4B///TUBA1B///TUBA1A///TUBA4A	tubulin alpha 1c///tubulin alpha 4b///tubulin alpha 1b///tubulin alpha 1a///tubulin alpha 4a
20044	4.69e-05	1.7e-06	5.37448	4.71208	1.40871	GRASP	general receptor for phosphoinositides 1 associated scaffold protein
360055	4.72e-05	1.71e-06	5.3729	4.70654	1.41596	RPF1	ribosome production factor 1 homolog
148061	6.79e-05	2.69e-06	-6.04661	4.70068	-1.13521	RORB	RAR related orphan receptor B
496005	4.76e-05	1.73e-06	5.37011	4.69678	1.17786	LMO2	LIM domain only 2
342009	6.25e-05	2.42e-06	5.45941	4.69179	2.0038	COL5A1	collagen type V alpha 1 chain
22093	4.83e-05	1.75e-06	5.36587	4.68189	1.06018	PIPSL///PSMD4	PIP5K1A and PSMD4-like, pseudogene///proteasome 26S subunit, non-ATPase 4
441061	5.22e-05	1.94e-06	5.46803	4.67888	0.959358	PSD3	pleckstrin and Sec7 domain containing 3
309014	4.85e-05	1.76e-06	5.36444	4.67687	0.929114	NAA30	N(alpha)-acetyltransferase 30, NatC catalytic subunit
415068	5.85e-05	2.22e-06	5.48451	4.67474	1.3212	ZNF274	zinc finger protein 274
451037	4.85e-05	1.77e-06	5.36369	4.67425	0.947687	ZXDC	ZXD family zinc finger C
64015	4.85e-05	1.77e-06	5.36322	4.67261	1.24921	NOP56	NOP56 ribonucleoprotein
44110	4.85e-05	1.77e-06	5.36313	4.6723	1.28924	CMSS1	cms1 ribosomal small subunit homolog (yeast)
52076	4.87e-05	1.78e-06	5.36217	4.66893	1.29576	COL15A1	collagen type XV alpha 1 chain
477111	5.13e-05	1.89e-06	5.36945	4.66786	1.51618	RPL7A	ribosomal protein L7a
439039	6.34e-05	2.46e-06	-5.80974	4.666	-1.09669	TRMT10A	tRNA methyltransferase 10A
486084	5.09e-05	1.88e-06	5.38531	4.66078	0.937254	EXOSC6	exosome component 6
99112	4.91e-05	1.79e-06	5.35944	4.65936	1.34896	GIMAP6	GTPase, IMAP family member 6
81079	4.94e-05	1.81e-06	-5.35697	4.65071	-0.771217	PATJ	PATJ, crumbs cell polarity complex component
2061	4.94e-05	1.81e-06	5.35681	4.65014	0.827593	RPS25	ribosomal protein S25
21026	5.14e-05	1.9e-06	5.38175	4.64854	1.18956	ROBO3	roundabout guidance receptor 3
59059	4.95e-05	1.82e-06	5.35626	4.64823	0.888088	RTFDC1	replication termination factor 2 domain containing 1
361085	4.96e-05	1.82e-06	5.35536	4.64507	1.31052	RPL17	ribosomal protein L17
157075	5e-05	1.84e-06	-5.36537	4.64481	-1.66507	CDS1	CDP-diacylglycerol synthase 1
391032	5.07e-05	1.86e-06	5.37359	4.63697	0.860748	BGLT3	beta globin locus transcript 3 (non-protein coding)
313097	5.15e-05	1.9e-06	5.39481	4.63327	0.852105	TNFRSF25	TNF receptor superfamily member 25
328066	5.91e-05	2.25e-06	5.52428	4.63201	1.11819	TWF2	twinfilin actin binding protein 2
319105	5.84e-05	2.21e-06	5.48677	4.62825	1.51425	NTMT1	N-terminal Xaa-Pro-Lys N-methyltransferase 1
470039	5.1e-05	1.88e-06	5.35893	4.62238	1.11074	BTN3A2	butyrophilin subfamily 3 member A2
456106	5.37e-05	2.01e-06	5.36553	4.6164	1.32149	SMG1	SMG1, nonsense mediated mRNA decay associated PI3K related kinase
300100	5.1e-05	1.88e-06	5.34687	4.61532	1.26475	NLRC5	NLR family CARD domain containing 5
488109	5.19e-05	1.93e-06	5.35197	4.59816	1.72629	APOD	apolipoprotein D
140068	6.02e-05	2.31e-06	-5.56452	4.59354	-1.14784	TTLL7	tubulin tyrosine ligase like 7
228090	6.36e-05	2.48e-06	-5.69022	4.59122	-1.09352	KHNYN///KHNYN	KH and NYN domain containing///KH and NYN domain containing
99056	5.66e-05	2.13e-06	-5.47741	4.59118	-1.15297	THOC6	THO complex 6
213051	5.2e-05	1.93e-06	-5.33908	4.58804	-0.689568	LOC105371485	uncharacterized LOC105371485
356070	5.37e-05	2.01e-06	5.39328	4.58782	0.593535	FER1L4	fer-1 like family member 4, pseudogene
380089	6.62e-05	2.61e-06	5.43599	4.58572	1.50164	FRA10AC1	fragile site, folic acid type, rare, fra(10)(q23.3) or fra(10)(q24.2) candidate 1
318111	5.22e-05	1.94e-06	5.33806	4.58445	1.37031	LOC643733	caspase 4, apoptosis-related cysteine peptidase pseudogene
352073	5.26e-05	1.96e-06	5.33509	4.57407	0.911321	SDF4	stromal cell derived factor 4
53017	5.26e-05	1.96e-06	-5.33502	4.57382	-1.50136	IFI27	interferon alpha inducible protein 27
81087	5.28e-05	1.97e-06	5.33387	4.56981	0.848473	ARMC5	armadillo repeat containing 5
152094	5.3e-05	1.98e-06	5.33224	4.56408	1.21716	MRPL32///ALDOA	mitochondrial ribosomal protein L32///aldolase, fructose-bisphosphate A
305017	5.45e-05	2.05e-06	5.33483	4.56031	1.05341	LRCH4///ZASP///LRCH4	leucine rich repeats and calponin homology domain containing 4///ZO-2 associated speckle protein///leucine rich repeats and calponin homology domain containing 4
8010	5.46e-05	2.05e-06	5.37326	4.55965	0.879596	MOB2	MOB kinase activator 2
159068	5.74e-05	2.17e-06	-5.43545	4.553	-1.60661	ERO1B	endoplasmic reticulum oxidoreductase 1 beta
100081	6e-05	2.29e-06	5.34169	4.55131	2.194	NUPR1	nuclear protein 1, transcriptional regulator
225086	5.43e-05	2.04e-06	-5.33613	4.54305	-1.28621	GOLPH3	golgi phosphoprotein 3
56075	5.46e-05	2.05e-06	5.32202	4.52832	1.21631	FAM20C	family with sequence similarity 20 member C
410050	6.29e-05	2.43e-06	5.41876	4.51359	1.16832	TRAP1	TNF receptor associated protein 1
413051	5.72e-05	2.16e-06	-5.35885	4.51048	-1.16629	CYHR1	cysteine and histidine rich 1
278080	5.83e-05	2.2e-06	-5.38184	4.50789	-1.02341	SMAD5	SMAD family member 5
92108	5.58e-05	2.1e-06	5.31605	4.50744	1.48327	IRF1	interferon regulatory factor 1
457089	6.19e-05	2.38e-06	-5.48426	4.50642	-1.0368	ZZEF1///ZZEF1	zinc finger ZZ-type and EF-hand domain containing 1///zinc finger ZZ-type and EF-hand domain containing 1
387032	6.37e-05	2.48e-06	5.37871	4.50483	1.58809	TFPI	tissue factor pathway inhibitor
398023	8.56e-05	3.58e-06	-6.07491	4.50172	-0.862692	IPP	intracisternal A particle-promoted polypeptide
145048	5.85e-05	2.22e-06	-5.36523	4.49271	-1.39476	XCR1	X-C motif chemokine receptor 1
57058	5.99e-05	2.29e-06	-5.40271	4.49099	-1.07674	MMP26	matrix metallopeptidase 26
353065	7.32e-05	2.95e-06	5.36152	4.48843	2.90708	THBS1	thrombospondin 1
150103	5.74e-05	2.17e-06	5.30684	4.47527	1.45599	SASH3	SAM and SH3 domain containing 3
66097	5.78e-05	2.18e-06	5.30492	4.46855	0.752603	POU2F1	POU class 2 homeobox 1
173014	6.61e-05	2.6e-06	5.43671	4.46854	1.87521	IRF2BP2	interferon regulatory factor 2 binding protein 2
160024	5.85e-05	2.22e-06	5.32424	4.46633	0.833914	RIF1	replication timing regulatory factor 1
286049	6.12e-05	2.35e-06	-5.39434	4.46325	-1.84658	PDE4C	phosphodiesterase 4C
499065	6.06e-05	2.32e-06	5.33777	4.45949	1.40509	ATXN10	ataxin 10
147110	5.93e-05	2.26e-06	5.33214	4.45706	0.903694	ARHGEF39	Rho guanine nucleotide exchange factor 39
321089	5.85e-05	2.21e-06	5.3012	4.45554	1.32757	HCG18	HLA complex group 18 (non-protein coding)
192033	5.85e-05	2.22e-06	5.29998	4.4513	1.00149	CMTM3	CKLF like MARVEL transmembrane domain containing 3
283061	6.29e-05	2.44e-06	-5.41824	4.44895	-0.858794	TMEM214	transmembrane protein 214
212076	5.99e-05	2.29e-06	5.29172	4.42246	0.896425	MAMDC2///RPL24///MAMDC2	MAM domain containing 2///ribosomal protein L24///MAM domain containing 2
440085	6.29e-05	2.44e-06	-5.36768	4.41826	-0.917084	SCAF11	SR-related CTD associated factor 11
72085	6.06e-05	2.32e-06	5.28801	4.4095	1.31748	VDAC3	voltage dependent anion channel 3
157099	6.79e-05	2.69e-06	5.37108	4.40624	1.54501	PPP1R2///PPP1R2	protein phosphatase 1 regulatory inhibitor subunit 2///protein phosphatase 1 regulatory inhibitor subunit 2
11082	6.19e-05	2.38e-06	5.31717	4.4057	1.43228	RIN2	Ras and Rab interactor 2
196024	6.08e-05	2.33e-06	-5.28649	4.40417	-0.70278	RAB8A	RAB8A, member RAS oncogene family
201096	6.08e-05	2.34e-06	-5.28604	4.4026	-1.13137	DGCR8	DGCR8 microprocessor complex subunit
185043	6.24e-05	2.41e-06	5.314	4.39482	1.16861	PLIN2	perilipin 2
328096	7.93e-05	3.27e-06	5.40815	4.38625	1.49763	LOXL3	lysyl oxidase like 3
84100	6.71e-05	2.65e-06	5.3437	4.38047	1.17016	MFSD13A	major facilitator superfamily domain containing 13A
313101	6.25e-05	2.42e-06	-5.28822	4.3766	-1.1517	KCTD14	potassium channel tetramerization domain containing 14
393035	0.000102	4.42e-06	-6.25702	4.37602	-1.26814	ZFP36L2	ZFP36 ring finger protein like 2
316029	6.32e-05	2.45e-06	5.29645	4.37043	0.854719	NBAS	neuroblastoma amplified sequence
20106	6.32e-05	2.45e-06	5.28421	4.36272	1.10019	STK4	serine/threonine kinase 4
451109	6.39e-05	2.49e-06	5.29201	4.35513	1.4557	SDHB	succinate dehydrogenase complex iron sulfur subunit B
184031	6.36e-05	2.48e-06	-5.2816	4.35365	-1.09621	LIAS	lipoic acid synthetase
248106	6.63e-05	2.62e-06	5.31788	4.35311	0.938636	IGHA2///IGHA1///IGH	immunoglobulin heavy constant alpha 2 (A2m marker)///immunoglobulin heavy constant alpha 1///immunoglobulin heavy locus
258093	7.44e-05	3.01e-06	-5.48	4.35179	-0.744398	PAPOLG	poly(A) polymerase gamma
438051	6.81e-05	2.7e-06	-5.38744	4.34863	-0.51582	PGBD3///ERCC6	piggyBac transposable element derived 3///ERCC excision repair 6, chromatin remodeling factor
347081	6.36e-05	2.47e-06	5.27037	4.34794	1.37489	LAT2	linker for activation of T-cells family member 2
41112	6.37e-05	2.48e-06	5.26938	4.34449	2.05151	HIST3H3	histone cluster 3, H3
144108	6.39e-05	2.49e-06	5.26781	4.33901	1.26708	RPP25///RPP25	ribonuclease P/MRP subunit p25///ribonuclease P/MRP subunit p25
100035	6.41e-05	2.51e-06	5.26659	4.33475	1.03517	NR4A1	nuclear receptor subfamily 4 group A member 1
178041	6.44e-05	2.52e-06	5.26523	4.33002	1.07933	CPSF1	cleavage and polyadenylation specific factor 1
184108	6.47e-05	2.53e-06	-5.26356	4.3242	-1.37246	TAPBP	TAP binding protein (tapasin)
102039	6.48e-05	2.54e-06	5.26302	4.32232	1.34835	ATP6V1H	ATPase H+ transporting V1 subunit H
19035	6.51e-05	2.55e-06	5.26169	4.31769	1.03585	GNAI2	G protein subunit alpha i2
380075	6.51e-05	2.55e-06	5.26155	4.31719	2.17267	COX6C	cytochrome c oxidase subunit 6C
263018	6.52e-05	2.56e-06	5.26072	4.31432	1.23472	VOPP1	vesicular, overexpressed in cancer, prosurvival protein 1
97105	6.92e-05	2.76e-06	5.31708	4.31057	0.996613	GATA2-AS1	GATA2 antisense RNA 1
286041	6.59e-05	2.59e-06	-5.25731	4.30242	-1.01406	ARAF	A-Raf proto-oncogene, serine/threonine kinase
207106	7.62e-05	3.1e-06	5.32937	4.29743	1.3708	ARMC9	armadillo repeat containing 9
499090	6.81e-05	2.7e-06	5.2569	4.29012	1.3366	ADARB1	adenosine deaminase, RNA specific B1
411011	6.66e-05	2.63e-06	5.25308	4.2877	0.7208	FBRSL1	fibrosin like 1
382026	6.76e-05	2.68e-06	5.27168	4.28509	0.861054	ALAS1	5'-aminolevulinate synthase 1
24076	6.72e-05	2.66e-06	5.25032	4.27805	0.951251	MRPS9	mitochondrial ribosomal protein S9
277060	6.99e-05	2.8e-06	5.31279	4.27592	1.22829	RAB4A	RAB4A, member RAS oncogene family
380020	6.75e-05	2.67e-06	5.24902	4.27354	1.15574	TCF3	transcription factor 3
118048	6.75e-05	2.67e-06	5.24893	4.27324	1.15215	GGCT	gamma-glutamylcyclotransferase
184070	6.9e-05	2.74e-06	-5.27741	4.26953	-0.882745	LARP4B	La ribonucleoprotein domain family member 4B
8060	7.05e-05	2.82e-06	5.26927	4.2631	0.987888	USP4	ubiquitin specific peptidase 4
35030	7.62e-05	3.1e-06	5.3129	4.26046	1.07371	CHI3L1	chitinase 3 like 1
266072	6.82e-05	2.71e-06	5.24505	4.25972	1.44422	ADGRA2	adhesion G protein-coupled receptor A2
57097	6.92e-05	2.76e-06	5.26349	4.25689	1.31406	UBQLN1	ubiquilin 1
347108	7.16e-05	2.87e-06	-5.30525	4.25061	-0.691056	CBL///CBL	Cbl proto-oncogene///Cbl proto-oncogene
304005	6.92e-05	2.76e-06	5.2399	4.24179	0.930477	VDAC2	voltage dependent anion channel 2
19037	6.92e-05	2.76e-06	5.23986	4.24163	1.22732	DAP3	death associated protein 3
312026	6.95e-05	2.77e-06	5.23814	4.23566	0.911189	HNRNPLL	heterogeneous nuclear ribonucleoprotein L like
224104	7.2e-05	2.89e-06	5.24989	4.23188	1.04192	NSMCE3	NSE3 homolog, SMC5-SMC6 complex component
185112	9.24e-05	3.92e-06	5.31195	4.23147	1.81745	VASN	vasorin
185096	6.99e-05	2.8e-06	-5.236	4.22822	-0.807613	RNF130	ring finger protein 130
273103	7.06e-05	2.83e-06	5.2328	4.21709	1.3356	MCUB	mitochondrial calcium uniporter dominant negative beta subunit
483102	7.47e-05	3.03e-06	5.27584	4.21129	3.1263	LCN2	lipocalin 2
414108	7.1e-05	2.85e-06	5.23089	4.21043	1.56816	KIAA0196	KIAA0196
186026	8.06e-05	3.33e-06	-5.42375	4.2045	-0.787636	ABCB8	ATP binding cassette subfamily B member 8
58091	7.18e-05	2.88e-06	5.22765	4.19914	0.946458	ZDHHC17	zinc finger DHHC-type containing 17
4013	7.41e-05	2.99e-06	-5.26577	4.19367	-1.13297	TES	testin LIM domain protein
232022	7.92e-05	3.25e-06	5.33197	4.18688	1.21741	SMO	smoothened, frizzled class receptor
343098	7.63e-05	3.11e-06	5.26818	4.18547	1.18275	UBE2W	ubiquitin conjugating enzyme E2 W (putative)
238067	7.28e-05	2.93e-06	5.22294	4.18278	1.22465	TMEM204	transmembrane protein 204
72005	7.29e-05	2.93e-06	5.2226	4.18159	1.35903	ARHGDIB	Rho GDP dissociation inhibitor beta
410096	7.34e-05	2.96e-06	5.22037	4.17384	1.95212	AKAP12	A-kinase anchoring protein 12
163004	7.42e-05	2.99e-06	5.2168	4.16143	0.920008	PSMD11	proteasome 26S subunit, non-ATPase 11
499037	7.45e-05	3.01e-06	5.21538	4.15649	1.19484	STARD13	StAR related lipid transfer domain containing 13
312054	7.46e-05	3.02e-06	5.21452	4.15349	1.36886	MYO1B	myosin IB
436052	7.46e-05	3.02e-06	5.2143	4.15273	1.04433	ATP5J2///ATP5J2	ATP synthase, H+ transporting, mitochondrial Fo complex subunit F2///ATP synthase, H+ transporting, mitochondrial Fo complex subunit F2
496095	8.72e-05	3.66e-06	5.44231	4.1429	1.08603	SCARB2///SERPINE1	scavenger receptor class B member 2///serpin family E member 1
193112	9.3e-05	3.95e-06	5.41723	4.14218	2.14453	SLC12A9	solute carrier family 12 member 9
199082	7.7e-05	3.14e-06	5.23854	4.13667	1.16128	TMEM176A	transmembrane protein 176A
270094	7.77e-05	3.18e-06	5.24797	4.13326	1.36382	DNAJA2	DnaJ heat shock protein family (Hsp40) member A2
310004	7.63e-05	3.11e-06	5.20639	4.12526	1.2286	PLEKHG1	pleckstrin homology and RhoGEF domain containing G1
466097	7.86e-05	3.22e-06	5.2075	4.11944	1.13226	SVIL	supervillin
99020	7.66e-05	3.13e-06	5.20467	4.11927	1.33643	HLA-DPB1///HLA-DPB2	major histocompatibility complex, class II, DP beta 1///major histocompatibility complex, class II, DP beta 2 (pseudogene)
35081	7.77e-05	3.18e-06	5.22294	4.11749	0.878201	GDAP2	ganglioside induced differentiation associated protein 2
196046	9.3e-05	3.95e-06	-5.50029	4.11694	-1.03576	CANT1	calcium activated nucleotidase 1
501001	7.92e-05	3.26e-06	5.24137	4.11086	1.07476	ZNF701	zinc finger protein 701
16003	7.73e-05	3.16e-06	5.20207	4.11026	1.04475	ULK1	unc-51 like autophagy activating kinase 1
394010	7.75e-05	3.17e-06	5.20113	4.10698	1.4577	ZFP36	ZFP36 ring finger protein
459048	7.76e-05	3.18e-06	5.20045	4.1046	1.10271	NCAPD2	non-SMC condensin I complex subunit D2
417015	7.98e-05	3.28e-06	5.23883	4.10227	1.00036	C1orf112	chromosome 1 open reading frame 112
2110	7.77e-05	3.18e-06	5.19964	4.1018	1.5975	NMI	N-myc and STAT interactor
354083	7.92e-05	3.26e-06	5.21621	4.09438	1.07334	TAB2	TGF-beta activated kinase 1/MAP3K7 binding protein 2
10005	8.72e-05	3.66e-06	5.29668	4.09379	0.842287	CYP11A1	cytochrome P450 family 11 subfamily A member 1
450033	7.85e-05	3.22e-06	5.19653	4.09102	1.1543	CETN3	centrin 3
471046	9.52e-05	4.07e-06	5.28185	4.08112	0.958272	REEP5	receptor accessory protein 5
274099	9.65e-05	4.14e-06	5.29487	4.07359	1.1509	ZNF79	zinc finger protein 79
87105	9.08e-05	3.83e-06	5.26621	4.06401	1.14047	KIAA1211L	KIAA1211 like
292001	8.03e-05	3.31e-06	5.18865	4.06363	0.948252	ABL2	ABL proto-oncogene 2, non-receptor tyrosine kinase
25062	8.3e-05	3.45e-06	5.2378	4.06234	0.803918	SMUG1	single-strand-selective monofunctional uracil-DNA glycosylase 1
453102	9.57e-05	4.1e-06	-5.43115	4.06044	-0.883914	FAM65A	family with sequence similarity 65 member A
271056	8.06e-05	3.33e-06	5.18702	4.058	1.20824	SYNCRIP	synaptotagmin binding cytoplasmic RNA interacting protein
112038	8.06e-05	3.33e-06	5.18689	4.05754	0.918284	ACBD6	acyl-CoA binding domain containing 6
244096	9.23e-05	3.91e-06	5.2298	4.05708	1.52067	IL15	interleukin 15
103020	8.12e-05	3.36e-06	5.18448	4.04917	0.97219	GAS8	growth arrest specific 8
346006	8.17e-05	3.39e-06	5.19337	4.04849	1.47743	IL16	interleukin 16
63089	8.24e-05	3.42e-06	5.19053	4.03869	0.697326	VPS33A	VPS33A, CORVET/HOPS core subunit
227083	8.5e-05	3.55e-06	-5.22996	4.03595	-0.617929	SPTBN4	spectrin beta, non-erythrocytic 4
289017	8.5e-05	3.55e-06	5.19196	4.03315	1.60437	CBR3	carbonyl reductase 3
501013	8.43e-05	3.51e-06	5.20699	4.02904	1.11363	CALU	calumenin
172034	9.14e-05	3.86e-06	5.24804	4.02212	1.43773	ITGA1	integrin subunit alpha 1
330101	8.65e-05	3.62e-06	5.18626	4.01364	1.48204	TNFSF13B	tumor necrosis factor superfamily member 13b
451074	8.49e-05	3.54e-06	5.18121	4.00654	0.802708	HAGH	hydroxyacylglutathione hydrolase
478080	8.54e-05	3.57e-06	5.16775	3.99117	0.805071	TRIM26	tripartite motif containing 26
412012	8.65e-05	3.62e-06	-5.18609	3.99106	-1.96422	EIF5A	eukaryotic translation initiation factor 5A
198070	9.07e-05	3.83e-06	-5.25089	3.98941	-0.786835	SYT3	synaptotagmin 3
412006	8.63e-05	3.61e-06	5.17546	3.9867	1.06305	TMEM60	transmembrane protein 60
17109	8.67e-05	3.63e-06	5.16271	3.97371	0.937921	ANTXR2	anthrax toxin receptor 2
19104	8.72e-05	3.66e-06	5.16059	3.96638	1.67408	FYB	FYN binding protein
145020	8.79e-05	3.69e-06	5.15844	3.95891	0.976166	PPA1///PPA1	pyrophosphatase (inorganic) 1///pyrophosphatase (inorganic) 1
178097	0.000119	5.34e-06	-5.61703	3.95265	-1.02975	MRPL49	mitochondrial ribosomal protein L49
270088	9.42e-05	4.02e-06	-5.25218	3.95221	-0.834945	TCAIM	T-cell activation inhibitor, mitochondrial
496054	9.1e-05	3.84e-06	5.19381	3.94979	1.13305	ASF1A///ASF1A	anti-silencing function 1A histone chaperone///anti-silencing function 1A histone chaperone
123058	9.28e-05	3.94e-06	5.18675	3.94726	1.01625	TANC1	tetratricopeptide repeat, ankyrin repeat and coiled-coil containing 1
157015	8.91e-05	3.74e-06	5.15454	3.9454	2.40684	S100A9///FKBP8	S100 calcium binding protein A9///FK506 binding protein 8
288059	9.4e-05	4.01e-06	-5.23733	3.94476	-0.56166	GCM2	glial cells missing homolog 2
496066	8.92e-05	3.75e-06	5.15369	3.94248	0.913096	WASH1	WAS protein family homolog 1
476037	8.97e-05	3.77e-06	5.15205	3.93679	1.43853	C1orf54	chromosome 1 open reading frame 54
214091	8.99e-05	3.79e-06	5.15117	3.93376	0.873843	TRAPPC3	trafficking protein particle complex 3
229065	9.07e-05	3.83e-06	5.14824	3.92359	1.1607	UBE2E3///UBE2E4P	ubiquitin conjugating enzyme E2 E3///ubiquitin conjugating enzyme E2 E4 pseudogene
345040	9.19e-05	3.89e-06	-5.16595	3.9221	-1.19272	ARF6	ADP ribosylation factor 6
331105	9.32e-05	3.96e-06	5.14916	3.91857	1.72834	NIPA2	non imprinted in Prader-Willi/Angelman syndrome 2
334058	0.000101	4.4e-06	5.24137	3.9149	1.7395	ROBO2	roundabout guidance receptor 2
13079	0.0001	4.33e-06	5.1724	3.9139	1.12282	USP9X	ubiquitin specific peptidase 9, X-linked
276026	9.26e-05	3.92e-06	5.16342	3.91345	1.05725	TRMT61A	tRNA methyltransferase 61A
398022	9.22e-05	3.9e-06	5.14254	3.90387	0.942878	KLHL5	kelch like family member 5
147005	0.0001	4.33e-06	5.22969	3.89816	0.891887	DCLK3	doublecortin like kinase 3
56106	0.000102	4.44e-06	5.22241	3.89649	1.68952	EXOSC3	exosome component 3
158112	9.28e-05	3.94e-06	5.14008	3.89537	1.09288	PECAM1	platelet and endothelial cell adhesion molecule 1
482092	0.000105	4.56e-06	5.21431	3.89514	2.00635	ST20	suppressor of tumorigenicity 20
309082	9.3e-05	3.95e-06	5.13934	3.89281	1.48826	BRK1///LINC00999	BRICK1, SCAR/WAVE actin nucleating complex subunit///long intergenic non-protein coding RNA 999
492063	0.000101	4.35e-06	5.18435	3.89042	1.75849	DDIT4///DDIT4	DNA damage inducible transcript 4///DNA damage inducible transcript 4
90093	9.36e-05	3.98e-06	-5.137	3.8847	-1.78936	ACTG1	actin gamma 1
422103	9.38e-05	3.99e-06	5.1363	3.88228	1.53988	SUB1	SUB1 homolog, transcriptional regulator
495008	9.76e-05	4.2e-06	5.1948	3.88124	0.972456	C17orf51	chromosome 17 open reading frame 51
405110	9.42e-05	4.02e-06	-5.13435	3.87554	-1.05833	LOC101928291	uncharacterized LOC101928291
270004	9.52e-05	4.07e-06	5.14163	3.87027	0.873863	SPSB1	splA/ryanodine receptor domain and SOCS box containing 1
37098	9.52e-05	4.07e-06	5.13117	3.86456	0.859395	TCFL5	transcription factor like 5
352026	0.000107	4.69e-06	5.19085	3.85996	1.01063	RFX3	regulatory factor X3
262013	9.8e-05	4.22e-06	-5.15489	3.85174	-0.813585	IKZF1	IKAROS family zinc finger 1
140104	9.65e-05	4.14e-06	-5.12629	3.84768	-0.681335	FAM102B	family with sequence similarity 102 member B
357112	0.00012	5.43e-06	5.33944	3.84625	1.43592	ZNF445	zinc finger protein 445
435083	9.82e-05	4.23e-06	5.14231	3.84126	1.21383	KYAT3	kynurenine aminotransferase 3
183003	0.000168	8.34e-06	-6.18397	3.82707	-1.35846	WSB1	WD repeat and SOCS box containing 1
396048	0.000106	4.65e-06	5.19307	3.81917	0.821049	FEM1B	fem-1 homolog B
38018	0.0001	4.31e-06	5.11455	3.8071	1.80959	SPARC	secreted protein acidic and cysteine rich
176108	0.000101	4.38e-06	5.1323	3.80706	1.52458	CEBPB	CCAAT/enhancer binding protein beta
350001	0.0001	4.32e-06	5.11437	3.80651	0.740729	PHF1	PHD finger protein 1
163016	0.000101	4.35e-06	5.12303	3.80633	1.06754	RCL1	RNA terminal phosphate cyclase like 1
88089	0.000101	4.37e-06	5.11121	3.79558	1.78243	SECTM1	secreted and transmembrane 1
137018	0.000101	4.37e-06	5.11068	3.79375	0.915451	ZNF318	zinc finger protein 318
38075	0.000101	4.38e-06	5.11015	3.79194	1.14684	CSF1R///CSF1R	colony stimulating factor 1 receptor///colony stimulating factor 1 receptor
250044	0.000108	4.74e-06	-5.20274	3.7909	-1.05974	ARF1	ADP ribosylation factor 1
183022	0.000102	4.43e-06	-5.11791	3.78875	-0.885824	LOC101928705	uncharacterized LOC101928705
29047	0.000101	4.4e-06	5.10922	3.7887	0.906338	HLA-E///HLA-C///HLA-B	major histocompatibility complex, class I, E///major histocompatibility complex, class I, C///major histocompatibility complex, class I, B
454003	0.000116	5.21e-06	5.15948	3.78627	1.34571	IFT57	intraflagellar transport 57
410054	0.000102	4.42e-06	-5.1075	3.78276	-0.75112	WBP1	WW domain binding protein 1
503111	0.000118	5.28e-06	5.22053	3.78159	1.92603	CYB5D2	cytochrome b5 domain containing 2
415031	0.000114	5.06e-06	5.15398	3.77822	1.0684	DDX28	DEAD-box helicase 28
229070	0.000103	4.47e-06	-5.10448	3.77235	-1.22689	NDUFC2	NADH:ubiquinone oxidoreductase subunit C2
4097	0.000103	4.51e-06	5.10224	3.7646	1.20837	ANKRD10	ankyrin repeat domain 10
163040	0.00011	4.85e-06	5.15249	3.76109	0.997031	ZNF12	zinc finger protein 12
191026	0.000105	4.59e-06	-5.11872	3.7607	-0.86891	ACOT8	acyl-CoA thioesterase 8
246071	0.000109	4.83e-06	-5.16784	3.75452	-0.712895	LOC389033	placenta specific 9 pseudogene
435034	0.00011	4.89e-06	5.11246	3.75421	1.11998	IFNAR2	interferon alpha and beta receptor subunit 2
20070	0.000139	6.55e-06	-5.54177	3.7537	-0.896353	ZNF383	zinc finger protein 383
448017	0.000118	5.33e-06	-5.27555	3.74569	-0.712897	GRAMD1B	GRAM domain containing 1B
153024	0.000106	4.64e-06	5.10445	3.74257	0.985953	RPS3A	ribosomal protein S3A
484022	0.000106	4.61e-06	5.09562	3.74176	1.4965	ANXA5	annexin A5
373096	0.000108	4.76e-06	-5.13196	3.74092	-1.21793	SEC22B	SEC22 homolog B, vesicle trafficking protein (gene/pseudogene)
85054	0.000107	4.7e-06	5.11248	3.73938	1.02261	TBR1	T-box, brain 1
238062	0.000108	4.79e-06	-5.1306	3.73634	-0.945731	LOC105379045	uncharacterized LOC105379045
430033	0.000106	4.64e-06	5.09396	3.73604	0.943837	GALT	galactose-1-phosphate uridylyltransferase
333050	0.000123	5.6e-06	5.1687	3.73342	1.25738	TLE3	transducin like enhancer of split 3
282016	0.000113	5e-06	5.10605	3.73254	1.55855	MAP1A	microtubule associated protein 1A
186090	0.000109	4.83e-06	5.09362	3.72798	1.52434	PCDH12	protocadherin 12
79105	0.000107	4.72e-06	5.09962	3.72599	0.848615	ARHGAP19	Rho GTPase activating protein 19
114029	0.000107	4.69e-06	5.0909	3.72549	1.04748	CAPNS1	calpain small subunit 1
209051	0.000108	4.78e-06	-5.10765	3.72293	-0.759362	TTLL11-IT1	TTLL11 intronic transcript 1
369060	0.000108	4.78e-06	-5.10712	3.7211	-1.43065	CAB39L	calcium binding protein 39 like
1072	0.00011	4.85e-06	5.11468	3.71525	1.94786	PERP///LOC400446	PERP, TP53 apoptosis effector///PERP, TP53 apoptosis effector pseudogene
358015	0.000117	5.26e-06	-5.1874	3.69989	-0.737123	PTBP1	polypyrimidine tract binding protein 1
15006	0.000112	4.97e-06	5.08512	3.69886	0.967132	RELT///RELT	RELT tumor necrosis factor receptor///RELT tumor necrosis factor receptor
53046	0.000114	5.1e-06	5.10016	3.68803	1.02643	UBIAD1	UbiA prenyltransferase domain containing 1
186010	0.000119	5.36e-06	-5.18179	3.68179	-0.96806	LIX1	limb and CNS expressed 1
354036	0.000126	5.77e-06	5.11499	3.67946	1.5206	AGPAT4	1-acylglycerol-3-phosphate O-acyltransferase 4
101091	0.000115	5.13e-06	5.12312	3.67737	0.737911	ZNF343	zinc finger protein 343
137100	0.000111	4.93e-06	5.07693	3.67733	1.37787	TFB2M	transcription factor B2, mitochondrial
482016	0.000121	5.48e-06	5.1303	3.67418	0.776193	ZNF783///LOC155060	zinc finger family member 783///AI894139 pseudogene
202089	0.000113	5.03e-06	5.07104	3.65706	0.924945	SH3GLB1	SH3 domain containing GRB2 like endophilin B1
257047	0.000114	5.07e-06	5.06884	3.64949	1.22477	ACVRL1	activin A receptor like type 1
271098	0.000114	5.09e-06	5.06794	3.64637	1.2037	IFITM2///IFITM1	interferon induced transmembrane protein 2///interferon induced transmembrane protein 1
269099	0.000114	5.1e-06	-5.06719	3.64378	-0.978921	OFD1	OFD1, centriole and centriolar satellite protein
156013	0.000114	5.11e-06	5.06695	3.64297	1.15822	CCDC85B	coiled-coil domain containing 85B
263040	0.000118	5.3e-06	5.08937	3.62952	0.935701	TMEM186	transmembrane protein 186
228076	0.000116	5.18e-06	-5.063	3.62938	-1.14138	PLXNB2	plexin B2
303102	0.000116	5.19e-06	5.06257	3.62788	1.47735	GBP2	guanylate binding protein 2
240100	0.000117	5.24e-06	-5.07015	3.62499	-1.21231	SERINC2	serine incorporator 2
297108	0.000125	5.71e-06	5.09208	3.61893	0.863256	IP6K1	inositol hexakisphosphate kinase 1
440009	0.000127	5.84e-06	5.15602	3.61779	0.62789	LSMEM1	leucine rich single-pass membrane protein 1
411061	0.000119	5.35e-06	5.05399	3.59838	0.83161	REEP3	receptor accessory protein 3
414018	0.000119	5.36e-06	5.05326	3.59584	0.711584	SEC62	SEC62 homolog, preprotein translocation factor
93033	0.000122	5.58e-06	5.06345	3.59476	1.16872	PSPC1	paraspeckle component 1
2040	0.000119	5.39e-06	5.05208	3.59182	0.839879	GPATCH2	G-patch domain containing 2
91012	0.000149	7.19e-06	5.16147	3.59141	1.07325	KRTAP1-3///KRTAP1-3	keratin associated protein 1-3///keratin associated protein 1-3
88035	0.00012	5.43e-06	5.0495	3.58293	0.89137	ZNF292	zinc finger protein 292
187057	0.000171	8.49e-06	5.30122	3.58112	1.71315	FAM210A	family with sequence similarity 210 member A
187086	0.000123	5.63e-06	5.08402	3.57953	1.07249	GUSB	glucuronidase beta
139021	0.000122	5.57e-06	5.06373	3.57334	0.854282	ZUFSP	zinc finger with UFM1 specific peptidase domain
162018	0.000121	5.49e-06	5.04664	3.57311	0.82452	C11orf58///C11orf58	chromosome 11 open reading frame 58///chromosome 11 open reading frame 58
116047	0.000122	5.53e-06	5.05493	3.57292	0.831539	MTRF1L	mitochondrial translational release factor 1 like
188044	0.000133	6.21e-06	5.12207	3.57059	1.11979	HAUS5	HAUS augmin like complex subunit 5
34062	0.000121	5.51e-06	5.04578	3.57014	0.890605	SNAPC5	small nuclear RNA activating complex polypeptide 5
324044	0.000172	8.57e-06	5.21429	3.56968	1.34241	MED21	mediator complex subunit 21
186097	0.000121	5.51e-06	-5.04547	3.56907	-1.08331	CERS6	ceramide synthase 6
470107	0.000129	6e-06	5.10391	3.56407	1.25594	NBPF10///NBPF15///NBPF11///NBPF14	neuroblastoma breakpoint family member 10///neuroblastoma breakpoint family member 15///neuroblastoma breakpoint family member 11///neuroblastoma breakpoint family member 14
479110	0.000127	5.87e-06	5.07187	3.56042	0.891077	FAM49B	family with sequence similarity 49 member B
410082	0.000127	5.84e-06	5.06148	3.55727	0.713034	EP400	E1A binding protein p400
81001	0.000125	5.7e-06	5.05717	3.55104	1.06718	ATL2	atlastin GTPase 2
11052	0.000123	5.62e-06	5.0401	3.55063	0.827935	TSR3	TSR3, acp transferase ribosome maturation factor
373004	0.000125	5.71e-06	5.05678	3.54974	1.29231	RIMKLB	ribosomal modification protein rimK like family member B
204108	0.000123	5.63e-06	5.0393	3.54785	0.784759	RNASET2	ribonuclease T2
327096	0.000129	6.02e-06	5.07683	3.54407	1.08924	BBS1	Bardet-Biedl syndrome 1
78018	0.000125	5.73e-06	-5.04485	3.53846	-1.08227	PDIA4	protein disulfide isomerase family A member 4
46060	0.000127	5.88e-06	5.03766	3.53664	0.779754	LOC101927467	uncharacterized LOC101927467
413031	0.000129	5.98e-06	-5.09116	3.53656	-0.627014	TMEM191C	transmembrane protein 191C
241082	0.000134	6.26e-06	5.0653	3.52974	1.29691	MSR1	macrophage scavenger receptor 1
228074	0.000131	6.08e-06	5.09966	3.52954	0.92223	VPS50	VPS50, EARP/GARPII complex subunit
37076	0.000125	5.75e-06	5.0338	3.52896	0.946787	SNRPA1///SNRPA1	small nuclear ribonucleoprotein polypeptide A'///small nuclear ribonucleoprotein polypeptide A'
313042	0.000126	5.76e-06	5.03333	3.52734	0.877433	BAG6	BCL2 associated athanogene 6
114064	0.000127	5.82e-06	5.04072	3.52435	1.00747	BTN2A2	butyrophilin subfamily 2 member A2
229090	0.000127	5.88e-06	5.04827	3.5208	1.45924	FST	follistatin
341043	0.000127	5.82e-06	-5.0301	3.51625	-0.962451	AAK1	AP2 associated kinase 1
454090	0.000147	7.08e-06	5.05473	3.51559	1.80781	ANGPTL2	angiopoietin like 2
331110	0.000127	5.83e-06	5.02981	3.51527	1.14017	SPAST	spastin
431038	0.000127	5.83e-06	5.0297	3.5149	0.617213	CACUL1	CDK2 associated cullin domain 1
104003	0.000127	5.84e-06	5.02914	3.51297	0.839841	NCBP3	nuclear cap binding subunit 3
118076	0.000127	5.85e-06	5.02886	3.51201	0.856912	RHOA///FTX	ras homolog family member A///FTX transcript, XIST regulator (non-protein coding)
368047	0.000127	5.85e-06	-5.02871	3.51149	-0.804038	PLEKHA1	pleckstrin homology domain containing A1
453024	0.000128	5.89e-06	-5.02665	3.5044	-0.793556	PPARA	peroxisome proliferator activated receptor alpha
445069	0.000128	5.9e-06	5.02643	3.50365	0.97665	BCAP29	B-cell receptor-associated protein 29
90037	0.000128	5.92e-06	5.02523	3.49954	1.06299	PPID	peptidylprolyl isomerase D
89064	0.000129	5.98e-06	5.02235	3.48965	0.605074	DHX8	DEAH-box helicase 8
92004	0.000136	6.36e-06	5.06046	3.4895	0.869116	RLF	rearranged L-myc fusion
369085	0.000143	6.84e-06	5.09301	3.47649	1.13296	ADRA2B	adrenoceptor alpha 2B
176048	0.000131	6.08e-06	5.01772	3.47378	1.30179	ACTB	actin beta
7038	0.000136	6.39e-06	5.07191	3.47275	1.15448	NMNAT3	nicotinamide nucleotide adenylyltransferase 3
182033	0.000197	1.01e-05	-5.64055	3.47239	-1.20001	VPS51	VPS51, GARP complex subunit
170034	0.000132	6.14e-06	5.02534	3.47184	1.10081	BTN3A2	butyrophilin subfamily 3 member A2
121090	0.000131	6.1e-06	5.01678	3.47053	0.984884	NCK1	NCK adaptor protein 1
204069	0.000139	6.55e-06	-5.09176	3.46737	-0.906091	SUCNR1	succinate receptor 1
439017	0.00014	6.64e-06	5.02461	3.45783	1.59699	TGFBI///RPS18	transforming growth factor beta induced///ribosomal protein S18
308104	0.000133	6.22e-06	5.01154	3.45259	1.16861	MYO9B	myosin IXB
50004	0.00014	6.61e-06	5.04919	3.452	1.05947	SYNRG	synergin, gamma
53082	0.000134	6.29e-06	5.00825	3.44127	0.762959	EHD4	EH domain containing 4
214012	0.000157	7.66e-06	5.08953	3.43839	1.01705	RAB28	RAB28, member RAS oncogene family
271065	0.000142	6.76e-06	-5.08209	3.43578	-1.28156	BPNT1	3'(2'), 5'-bisphosphate nucleotidase 1
289109	0.000135	6.33e-06	5.00664	3.43578	0.831653	SNX15	sorting nexin 15
311001	0.000143	6.84e-06	-5.09309	3.43441	-0.709391	ARL3///ARL3	ADP ribosylation factor like GTPase 3///ADP ribosylation factor like GTPase 3
124002	0.000136	6.39e-06	5.0141	3.43351	1.05206	ITGBL1	integrin subunit beta like 1
496039	0.000139	6.6e-06	5.0496	3.4319	0.878764	ITFG1	integrin alpha FG-GAP repeat containing 1
138088	0.000135	6.35e-06	5.00544	3.43165	0.756112	UBE2F	ubiquitin conjugating enzyme E2 F (putative)
240062	0.000153	7.41e-06	5.02831	3.4308	1.65308	CD86	CD86 molecule
331003	0.000148	7.11e-06	5.06712	3.43022	1.29451	TOM1L1	target of myb1 like 1 membrane trafficking protein
5073	0.000144	6.88e-06	5.0256	3.42993	1.08928	GJD3	gap junction protein delta 3
289046	0.000136	6.38e-06	-5.00415	3.42722	-0.817953	VRK3	vaccinia related kinase 3
375036	0.000137	6.43e-06	5.00218	3.42047	1.00139	PAAF1	proteasomal ATPase associated factor 1
221029	0.000154	7.47e-06	5.11388	3.42037	1.69273	KIF26B	kinesin family member 26B
227104	0.000138	6.48e-06	5.00988	3.41912	1.01111	MAN2A2	mannosidase alpha class 2A member 2
152010	0.000137	6.45e-06	5.00127	3.41736	2.10895	S100A10	S100 calcium binding protein A10
457095	0.00016	7.85e-06	5.13403	3.4164	1.53283	NDC80	NDC80, kinetochore complex component
415018	0.000143	6.85e-06	5.05161	3.40554	0.661016	PEX1	peroxisomal biogenesis factor 1
60067	0.000138	6.53e-06	4.99774	3.40527	0.702477	AGO1	argonaute 1, RISC catalytic component
477052	0.000142	6.8e-06	5.04092	3.40299	0.816415	MYO3A	myosin IIIA
486026	0.000145	6.93e-06	5.06117	3.40286	0.721379	TM4SF18	transmembrane 4 L six family member 18
52005	0.000145	6.97e-06	5.03407	3.40166	0.752749	CCDC189	coiled-coil domain containing 189
380040	0.000139	6.55e-06	4.99668	3.40164	1.04135	CLASRP	CLK4 associating serine/arginine rich protein
112074	0.000139	6.55e-06	4.99657	3.40124	1.12772	ITGB2	integrin subunit beta 2
60103	0.000139	6.56e-06	4.9964	3.40068	0.934358	MTX2	metaxin 2
428039	0.000139	6.57e-06	4.99574	3.39841	0.908842	RIT1	Ras like without CAAX 1
353004	0.000173	8.66e-06	5.14244	3.39815	1.4579	GPATCH4	G-patch domain containing 4
319084	0.000141	6.71e-06	5.01047	3.39255	1.21414	FANCL	Fanconi anemia complementation group L
447059	0.000141	6.72e-06	-5.01018	3.39154	-0.830995	MLPH	melanophilin
234026	0.00014	6.64e-06	-4.99298	3.38897	-1.16677	SMIM14	small integral membrane protein 14
10070	0.00014	6.64e-06	4.99271	3.38805	1.96109	AKAP12	A-kinase anchoring protein 12
453021	0.00014	6.67e-06	-4.99148	3.38381	-0.562783	ZNF831	zinc finger protein 831
434002	0.000141	6.7e-06	4.99045	3.3803	0.940866	AUP1	ancient ubiquitous protein 1
37008	0.000141	6.7e-06	4.99039	3.38009	0.790037	RNF157	ring finger protein 157
431009	0.000197	1.01e-05	5.03688	3.37967	2.22053	PAIP2	poly(A) binding protein interacting protein 2
403062	0.000142	6.76e-06	4.99796	3.37849	0.772034	MTO1	mitochondrial tRNA translation optimization 1
79065	0.000143	6.86e-06	-5.00427	3.37152	-1.3995	TOB1	transducer of ERBB2, 1
106072	0.000143	6.87e-06	-5.00397	3.37051	-1.2664	LOC100287357///CXADR	coxsackie virus and adenovirus receptor pseudogene///coxsackie virus and adenovirus receptor
30035	0.000142	6.77e-06	4.98748	3.37012	1.44481	CTSB///CTSB	cathepsin B///cathepsin B
322062	0.000172	8.56e-06	-5.58738	3.35908	-2.0955	SLC31A1	solute carrier family 31 member 1
388006	0.000153	7.42e-06	4.99275	3.35076	1.27028	NEDD9	neural precursor cell expressed, developmentally down-regulated 9
199067	0.000156	7.62e-06	5.02018	3.34674	1.42558	NR2F2	nuclear receptor subfamily 2 group F member 2
101049	0.000158	7.69e-06	5.03018	3.34541	0.992345	ZNF155	zinc finger protein 155
373086	0.000161	7.91e-06	5.06428	3.34502	0.994893	PLXNA4	plexin A4
401087	0.000146	7.01e-06	4.97759	3.33626	1.27113	LOC105371433	uncharacterized LOC105371433
397076	0.000167	8.28e-06	-5.1365	3.33349	-0.586291	ARL15	ADP ribosylation factor like GTPase 15
448025	0.000147	7.09e-06	-4.98443	3.33241	-0.622062	LRSAM1	leucine rich repeat and sterile alpha motif containing 1
473016	0.00019	9.71e-06	5.12704	3.33138	1.37758	FAHD2B///FAHD2A	fumarylacetoacetate hydrolase domain containing 2B///fumarylacetoacetate hydrolase domain containing 2A
114035	0.000147	7.05e-06	4.97612	3.33126	0.872589	LSM8	LSM8 homolog, U6 small nuclear RNA associated
53054	0.000149	7.2e-06	4.9903	3.32422	0.856626	ZCCHC17	zinc finger CCHC-type containing 17
230002	0.000149	7.16e-06	4.98167	3.32301	1.00631	ATP8B4	ATPase phospholipid transporting 8B4 (putative)
206032	0.000153	7.41e-06	5.00419	3.31186	0.986832	LINC01234	long intergenic non-protein coding RNA 1234
247011	0.000261	1.45e-05	-6.03069	3.30946	-1.9002	SPTLC2	serine palmitoyltransferase long chain base subunit 2
135109	0.000164	8.06e-06	-5.05871	3.30491	-0.673986	GAL3ST1	galactose-3-O-sulfotransferase 1
88020	0.000155	7.55e-06	4.9769	3.30154	0.980537	UBTF	upstream binding transcription factor, RNA polymerase I
151021	0.000151	7.28e-06	4.96667	3.29891	0.653903	SAP30BP///RPS20	SAP30 binding protein///ribosomal protein S20
20057	0.000161	7.9e-06	4.98581	3.2971	1.38897	HIC1	hypermethylated in cancer 1
441089	0.000151	7.31e-06	-4.96571	3.29565	-0.643159	PRRT2	proline rich transmembrane protein 2
114075	0.000156	7.6e-06	-4.99672	3.28688	-1.04749	EFNB2	ephrin B2
457059	0.000174	8.73e-06	-5.11985	3.28235	-0.85911	SF1///ZFP28	splicing factor 1///ZFP28 zinc finger protein
128054	0.000153	7.42e-06	4.96159	3.28157	0.925239	TRIOBP///EXOC7	TRIO and F-actin binding protein///exocyst complex component 7
368020	0.000153	7.43e-06	4.96123	3.28034	1.07245	POLE4	DNA polymerase epsilon 4, accessory subunit
458054	0.000162	7.97e-06	5.00693	3.27909	0.685959	CCDC102A	coiled-coil domain containing 102A
440065	0.000164	8.11e-06	5.01443	3.27027	1.0861	ZNF697	zinc finger protein 697
139060	0.000162	7.98e-06	-5.01934	3.26552	-0.65559	LOC106345152	uncharacterized LOC106345152
249059	0.000158	7.72e-06	-4.98109	3.26427	-0.582504	MAPK4	mitogen-activated protein kinase 4
447043	0.000171	8.52e-06	-5.05709	3.26047	-0.717458	EPHA1-AS1	EPHA1 antisense RNA 1
163110	0.000156	7.6e-06	4.95479	3.25833	1.15247	RGL1	ral guanine nucleotide dissociation stimulator like 1
94040	0.000156	7.6e-06	-4.95477	3.25827	-1.21035	SLC16A2	solute carrier family 16 member 2
218032	0.000156	7.62e-06	-4.95384	3.25508	-1.05903	TMEM14A	transmembrane protein 14A
230086	0.000164	8.08e-06	5.01585	3.25409	1.12553	HSPA5	heat shock protein family A (Hsp70) member 5
165100	0.000156	7.64e-06	4.95335	3.2534	0.741923	ARIH2	ariadne RBR E3 ubiquitin protein ligase 2
351090	0.000159	7.75e-06	-4.96914	3.25266	-1.19573	MAPK3	mitogen-activated protein kinase 3
372044	0.000167	8.27e-06	5.03613	3.25001	0.669909	LOC100507600	uncharacterized LOC100507600
133026	0.000178	8.97e-06	5.02602	3.24797	1.80339	STMN1	stathmin 1
324085	0.000172	8.6e-06	-5.07045	3.24361	-1.67365	MSMO1	methylsterol monooxygenase 1
24082	0.000159	7.76e-06	4.94874	3.23766	0.765531	MAP3K7	mitogen-activated protein kinase kinase kinase 7
88040	0.000161	7.91e-06	4.96355	3.23377	0.749059	ZC3H7A	zinc finger CCCH-type containing 7A
496004	0.00016	7.85e-06	4.94547	3.2265	1.33933	PQBP1	polyglutamine binding protein 1
457039	0.000233	1.26e-05	-5.43551	3.21621	-0.917945	SEMA5A	semaphorin 5A
366072	0.000162	7.96e-06	4.94167	3.21354	1.4168	ELOVL5	ELOVL fatty acid elongase 5
245026	0.000172	8.61e-06	4.98408	3.20381	0.701972	LINC00863	long intergenic non-protein coding RNA 863
100063	0.000164	8.05e-06	4.93823	3.2018	0.753564	MKRN1///MKRN1	makorin ring finger protein 1///makorin ring finger protein 1
456016	0.000174	8.74e-06	4.96783	3.18182	1.73554	RPL36AP40	ribosomal protein L36a pseudogene 40
321023	0.000194	9.97e-06	-5.11833	3.17911	-0.804278	ANKRD10	ankyrin repeat domain 10
296034	0.000168	8.32e-06	4.92908	3.17058	0.874766	RPS27	ribosomal protein S27
139109	0.000185	9.4e-06	4.95832	3.17048	1.15681	PDP2	pyruvate dehyrogenase phosphatase catalytic subunit 2
17080	0.000168	8.34e-06	4.92836	3.16815	0.910999	TMEM35B///LOC653160///ZMYM6	transmembrane protein 35B///uncharacterized LOC653160///zinc finger MYM-type containing 6
488108	0.000174	8.73e-06	4.94578	3.16814	1.48223	CFL2	cofilin 2
72036	0.000169	8.42e-06	4.93533	3.1656	0.888068	COX11	COX11, cytochrome c oxidase copper chaperone
107034	0.000169	8.39e-06	-4.92671	3.16252	-0.6777	LOC101928000	uncharacterized LOC101928000
202059	0.000171	8.49e-06	4.93281	3.15708	1.03583	TEX10	testis expressed 10
379037	0.00017	8.44e-06	4.92482	3.15608	1.58879	PAPLN	papilin, proteoglycan like sulfated glycoprotein
6107	0.00017	8.45e-06	4.92467	3.15557	0.893211	DYM	dymeclin
143085	0.000184	9.33e-06	4.99975	3.15256	0.763209	BRD8	bromodomain containing 8
331021	0.000171	8.49e-06	4.92328	3.15083	1.0784	EBNA1BP2	EBNA1 binding protein 2
331096	0.000204	1.06e-05	4.97538	3.14863	2.20601	SULF1	sulfatase 1
332007	0.000181	9.16e-06	4.96615	3.1448	0.74849	RWDD2A	RWD domain containing 2A
415102	0.000173	8.67e-06	4.93692	3.1439	0.703149	GPATCH8	G-patch domain containing 8
258100	0.000172	8.57e-06	4.92065	3.14187	0.778941	ZNF408///ZNF408	zinc finger protein 408///zinc finger protein 408
244005	0.000172	8.59e-06	4.91983	3.13906	0.57087	TAF12	TATA-box binding protein associated factor 12
50019	0.000172	8.61e-06	4.9191	3.13659	1.03861	LOC105378591	uncharacterized LOC105378591
8109	0.000206	1.07e-05	4.97124	3.13551	1.37545	ST3GAL4	ST3 beta-galactoside alpha-2,3-sialyltransferase 4
247077	0.000177	8.92e-06	-4.95039	3.13221	-0.942408	SLC31A1	solute carrier family 31 member 1
12003	0.000183	9.27e-06	-4.98792	3.129	-1.26025	ZNF69///ZNF69	zinc finger protein 69///zinc finger protein 69
296060	0.000201	1.04e-05	-5.10579	3.12612	-0.858293	LIPM	lipase family member M
172033	0.000174	8.71e-06	-4.9158	3.12535	-0.553037	TRAF6	TNF receptor associated factor 6
269085	0.000174	8.75e-06	-4.91451	3.12094	-1.32007	ATP2A3	ATPase sarcoplasmic/endoplasmic reticulum Ca2+ transporting 3
331012	0.000175	8.79e-06	4.9134	3.11718	1.02047	PROCR	protein C receptor
498101	0.000202	1.04e-05	4.99542	3.11186	0.794238	SART1	squamous cell carcinoma antigen recognized by T-cells 1
263045	0.000176	8.86e-06	-4.91116	3.10955	-0.778087	MICAL2	microtubule associated monooxygenase, calponin and LIM domain containing 2
457051	0.000185	9.4e-06	-4.9707	3.10625	-0.984255	KIAA1468	KIAA1468
228102	0.000178	8.96e-06	4.90793	3.09854	0.936461	GNPAT	glyceronephosphate O-acyltransferase
476002	0.000185	9.39e-06	4.95855	3.09843	0.971385	SURF2	surfeit 2
440008	0.000197	1.01e-05	4.97494	3.09563	0.903356	RECQL5	RecQ like helicase 5
351030	0.000179	9.01e-06	4.90644	3.09347	0.848599	MRPL9	mitochondrial ribosomal protein L9
98047	0.00018	9.07e-06	4.90431	3.08623	0.8806	LSG1	large 60S subunit nuclear export GTPase 1
270018	0.00018	9.1e-06	-4.90356	3.08367	-1.28337	SELT	selenoprotein T
245086	0.0003	1.74e-05	-6.0756	3.08258	-1.8208	FCHO2	FCH domain only 2
11044	0.000181	9.12e-06	4.90292	3.08148	0.72103	ZNF622	zinc finger protein 622
439016	0.000181	9.14e-06	4.90236	3.07961	0.861297	PSME1	proteasome activator subunit 1
18110	0.00019	9.69e-06	-4.96167	3.07674	-1.08575	COPG1	coatomer protein complex subunit gamma 1
453096	0.000181	9.17e-06	-4.90143	3.07645	-1.02699	CPSF6	cleavage and polyadenylation specific factor 6
346012	0.000231	1.24e-05	4.99045	3.06696	1.32338	DDB2	damage specific DNA binding protein 2
34073	0.000183	9.27e-06	4.89827	3.06569	0.745313	FJX1	four jointed box 1
178026	0.000184	9.32e-06	4.89669	3.06029	0.712619	SFSWAP	splicing factor SWAP homolog
359065	0.000189	9.62e-06	-4.9283	3.05863	-0.541527	NSAP11	nervous system abundant protein 11
498087	0.000236	1.28e-05	5.08185	3.05528	1.43195	HN1	hematological and neurological expressed 1
48078	0.000188	9.54e-06	4.90966	3.05208	0.935574	KIN	Kin17 DNA and RNA binding protein
365001	0.000228	1.22e-05	4.99637	3.04978	1.34754	B3GLCT	beta 3-glucosyltransferase
144027	0.000188	9.54e-06	4.89967	3.04482	0.812049	ASNSD1	asparagine synthetase domain containing 1
376100	0.000203	1.05e-05	-4.99201	3.03463	-1.30017	SMG1P5	SMG1P5, nonsense mediated mRNA decay associated PI3K related kinase pseudogene 5
417006	0.000188	9.59e-06	4.88852	3.03255	0.880734	TMEM267	transmembrane protein 267
68094	0.000192	9.83e-06	4.91129	3.0302	1.25424	IL13RA1	interleukin 13 receptor subunit alpha 1
351069	0.000191	9.73e-06	4.8845	3.01888	0.833019	TMEM138	transmembrane protein 138
266073	0.000276	1.56e-05	-5.12073	3.01365	-0.970877	STXBP5L	syntaxin binding protein 5 like
459022	0.000192	9.78e-06	4.88288	3.01337	1.29015	PDIA3	protein disulfide isomerase family A member 3
374112	0.000192	9.81e-06	4.88217	3.01096	1.11465	SIKE1	suppressor of IKBKE 1
94013	0.000192	9.85e-06	4.88101	3.007	0.921042	USP14	ubiquitin specific peptidase 14
490025	0.000194	9.95e-06	4.8876	3.00401	0.971341	SGPL1	sphingosine-1-phosphate lyase 1
58018	0.000193	9.9e-06	4.87945	3.00171	1.38996	ARHGEF17	Rho guanine nucleotide exchange factor 17
72072	0.000194	9.93e-06	4.87852	2.99856	0.783216	NME2	NME/NM23 nucleoside diphosphate kinase 2
373016	0.000194	9.96e-06	4.87769	2.99575	0.888512	KIZ	kizuna centrosomal protein
229007	0.0002	1.03e-05	4.90836	2.99232	0.963236	EPB42	erythrocyte membrane protein band 4.2
16039	0.000195	1e-05	-4.87592	2.98973	-1.13087	ALDOC	aldolase, fructose-bisphosphate C
479078	0.000202	1.04e-05	4.91615	2.98911	1.18094	UCK2	uridine-cytidine kinase 2
183016	0.000197	1.02e-05	4.88155	2.98357	0.936294	SCOC	short coiled-coil protein
464019	0.000198	1.02e-05	4.88064	2.98052	1.77463	TAP1	transporter 1, ATP binding cassette subfamily B member
487005	0.000235	1.27e-05	4.98338	2.97866	0.897491	CBX5	chromobox 5
244010	0.000205	1.06e-05	4.90996	2.96864	0.660958	MED13L	mediator complex subunit 13 like
445066	0.00021	1.1e-05	-4.93651	2.96221	-1.24224	VN1R3	vomeronasal 1 receptor 3 (gene/pseudogene)
69108	0.000201	1.03e-05	-4.86693	2.95921	-1.35638	AHNAK	AHNAK nucleoprotein
403075	0.000204	1.06e-05	-4.88995	2.9589	-0.697109	FNTB	farnesyltransferase, CAAX box, beta
392029	0.000213	1.12e-05	4.91891	2.95829	0.643955	MPPE1	metallophosphoesterase 1
316079	0.000215	1.13e-05	-4.95626	2.95738	-0.994306	WDR45B	WD repeat domain 45B
140016	0.000201	1.04e-05	4.86591	2.95574	0.934344	COPS6	COP9 signalosome subunit 6
320010	0.000202	1.05e-05	4.86371	2.94829	1.67067	RGS2	regulator of G-protein signaling 2
179002	0.000205	1.06e-05	-4.87821	2.94636	-0.756738	ALG12	ALG12, alpha-1,6-mannosyltransferase
375020	0.000203	1.05e-05	4.86294	2.94568	0.778141	ADCYAP1R1	ADCYAP receptor type I
59108	0.000203	1.05e-05	4.86249	2.94415	0.897704	PDCL3P4///PDCL3	phosducin-like 3 pseudogene 4///phosducin like 3
311050	0.000207	1.08e-05	4.89382	2.94401	1.13102	PDIA5	protein disulfide isomerase family A member 5
305005	0.000236	1.27e-05	4.91939	2.93782	1.37594	GLRX2	glutaredoxin 2
121091	0.000204	1.06e-05	4.85943	2.93377	0.887017	CPSF6	cleavage and polyadenylation specific factor 6
103045	0.000205	1.06e-05	4.85887	2.93187	0.837617	CREG1	cellular repressor of E1A stimulated genes 1
370027	0.000205	1.07e-05	4.85844	2.93041	0.85752	NAA10	N(alpha)-acetyltransferase 10, NatA catalytic subunit
403017	0.000207	1.08e-05	4.86378	2.92361	0.634826	FIBIN	fin bud initiation factor homolog (zebrafish)
415036	0.000207	1.08e-05	4.85494	2.91853	1.26392	RINL	Ras and Rab interactor like
428080	0.000225	1.2e-05	4.88731	2.91055	1.27772	CDK16	cyclin dependent kinase 16
484079	0.000209	1.09e-05	-4.85121	2.90591	-0.790759	TXN2	thioredoxin 2
156075	0.000209	1.1e-05	4.84995	2.90163	1.35639	HSP90AB1	heat shock protein 90 alpha family class B member 1
409088	0.000228	1.22e-05	-4.9472	2.89257	-1.53931	KIAA1324	KIAA1324
57006	0.000213	1.12e-05	4.85419	2.89127	0.968101	CCDC51	coiled-coil domain containing 51
117075	0.000212	1.11e-05	4.84627	2.88917	0.95301	NADK2	NAD kinase 2, mitochondrial
311016	0.000222	1.18e-05	-4.90409	2.8889	-0.820115	OR4D2	olfactory receptor family 4 subfamily D member 2
495022	0.000232	1.25e-05	4.93989	2.88877	0.748871	TMEM240	transmembrane protein 240
273068	0.000217	1.15e-05	-4.87697	2.88808	-2.34066	SOSTDC1	sclerostin domain containing 1
367028	0.000226	1.2e-05	4.89731	2.88799	0.786736	FBLN7	fibulin 7
98097	0.000213	1.12e-05	-4.85293	2.88701	-0.776506	ZNRF2	zinc and ring finger 2, E3 ubiquitin protein ligase
261103	0.000214	1.13e-05	4.84213	2.87514	0.958435	NSUN2	NOP2/Sun RNA methyltransferase family member 2
412041	0.000216	1.14e-05	4.84027	2.86886	1.11023	PDLIM1	PDZ and LIM domain 1
238011	0.000226	1.2e-05	4.86336	2.86534	1.01338	YY1AP1///GON4L///HOXA3	YY1 associated protein 1///gon-4 like///homeobox A3
313085	0.000237	1.28e-05	-4.96247	2.86474	-0.847739	TMEM102	transmembrane protein 102
319111	0.000233	1.26e-05	4.91007	2.86417	0.680409	BHMT2	betaine--homocysteine S-methyltransferase 2
72008	0.000217	1.14e-05	4.83836	2.86237	0.865841	LAP3	leucine aminopeptidase 3
118096	0.000231	1.24e-05	4.85448	2.86116	1.59303	MMP2	matrix metallopeptidase 2
334016	0.000217	1.15e-05	4.83722	2.85854	0.799329	ATP11C	ATPase phospholipid transporting 11C
415096	0.00022	1.16e-05	4.85199	2.85843	0.940482	ZMYND8	zinc finger MYND-type containing 8
239006	0.000219	1.16e-05	-4.84366	2.85578	-0.728422	LOC100996635	uncharacterized LOC100996635
377107	0.000232	1.25e-05	4.88645	2.85268	0.692081	LOC101927830///TMLHE-AS1	uncharacterized LOC101927830///TMLHE antisense RNA 1
86111	0.000219	1.16e-05	4.83542	2.85243	0.924574	GRB2	growth factor receptor bound protein 2
247017	0.000219	1.16e-05	4.83395	2.84747	0.813788	SUCO	SUN domain containing ossification factor
144076	0.000292	1.68e-05	-5.19457	2.84293	-0.791193	WRAP73	WD repeat containing, antisense to TP73
229091	0.000221	1.17e-05	-4.8311	2.83782	-1.00263	HLCS	holocarboxylase synthetase
199074	0.000242	1.32e-05	4.89421	2.83661	0.954253	DENND4A	DENN domain containing 4A
203049	0.000288	1.65e-05	-5.1653	2.82908	-1.01497	LINC01305	long intergenic non-protein coding RNA 1305
34011	0.000225	1.2e-05	4.83498	2.82655	0.833161	RB1CC1	RB1 inducible coiled-coil 1
313003	0.000223	1.19e-05	4.82739	2.82526	0.923082	HDLBP	high density lipoprotein binding protein
393041	0.000231	1.25e-05	-4.87513	2.82465	-0.518305	MFSD9	major facilitator superfamily domain containing 9
439044	0.000232	1.25e-05	-4.87416	2.8215	-2.52225	SST	somatostatin
147100	0.000229	1.23e-05	4.85609	2.8189	0.750326	LOC283485	uncharacterized LOC283485
295110	0.000263	1.47e-05	4.90501	2.81793	0.758332	CARNMT1	carnosine N-methyltransferase 1
244103	0.000225	1.2e-05	4.82514	2.81766	0.98844	WDR54	WD repeat domain 54
405073	0.000227	1.22e-05	4.83971	2.81729	0.927349	LRRK2	leucine rich repeat kinase 2
10111	0.000241	1.32e-05	4.8954	2.81713	1.33911	CENPF	centromere protein F
58112	0.000227	1.21e-05	4.83104	2.81329	0.931745	MOSPD1	motile sperm domain containing 1
328097	0.000226	1.2e-05	4.82371	2.81283	1.66669	SRGN	serglycin
135060	0.000228	1.22e-05	-4.83814	2.81205	-1.55849	KCNAB1	potassium voltage-gated channel subfamily A member regulatory beta subunit 1
225035	0.000226	1.21e-05	4.82258	2.809	1.32858	SNRPG///SNRPG	small nuclear ribonucleoprotein polypeptide G///small nuclear ribonucleoprotein polypeptide G
333035	0.000262	1.46e-05	-5.01601	2.80856	-1.07067	MED16	mediator complex subunit 16
92074	0.000239	1.3e-05	4.86287	2.80619	1.1005	CASP5	caspase 5
414032	0.000238	1.29e-05	-4.88802	2.80536	-0.91029	RPS17	ribosomal protein S17
449052	0.000229	1.23e-05	-4.8273	2.8007	-0.897849	SH3RF2	SH3 domain containing ring finger 2
4020	0.000257	1.43e-05	4.885	2.79919	0.903806	CHRNB1	cholinergic receptor nicotinic beta 1 subunit
235074	0.000228	1.22e-05	4.81932	2.79798	0.765488	RNASE6	ribonuclease A family member k6
397093	0.000228	1.22e-05	4.81889	2.79651	1.25683	ACTN1	actinin alpha 1
364004	0.000237	1.29e-05	4.83307	2.79205	1.62101	FBLN2	fibulin 2
48099	0.000229	1.23e-05	4.81694	2.78994	1.09791	MAP1LC3B	microtubule associated protein 1 light chain 3 beta
441082	0.00023	1.23e-05	4.81648	2.78839	1.14037	RDX	radixin
193046	0.000264	1.47e-05	-4.99182	2.78383	-1.01679	GALK1	galactokinase 1
62003	0.000241	1.32e-05	4.87093	2.78103	0.655137	DAOA	D-amino acid oxidase activator
324049	0.000232	1.25e-05	-4.81341	2.77801	-0.985223	PRDX5	peroxiredoxin 5
416042	0.00026	1.45e-05	4.86748	2.77771	1.24762	PCDHB14	protocadherin beta 14
206050	0.000232	1.25e-05	4.81208	2.7735	1.18804	HOXB13	homeobox B13
243068	0.000285	1.62e-05	-5.00305	2.77287	-0.812818	ANAPC16	anaphase promoting complex subunit 16
35027	0.000248	1.36e-05	4.86036	2.76795	0.950053	VEZT	vezatin, adherens junctions transmembrane protein
150054	0.000233	1.26e-05	-4.81026	2.76735	-0.936559	EPN1	epsin 1
366041	0.000242	1.32e-05	4.82523	2.766	1.2913	ALDH1B1	aldehyde dehydrogenase 1 family member B1
247061	0.000275	1.55e-05	4.88807	2.76515	0.750364	SNX13	sorting nexin 13
360034	0.000241	1.31e-05	4.81718	2.76505	1.41075	RBMS1	RNA binding motif single stranded interacting protein 1
470045	0.000239	1.3e-05	-4.83957	2.76422	-0.568949	IGF2BP2	insulin like growth factor 2 mRNA binding protein 2
75103	0.000237	1.29e-05	4.81373	2.7551	1.03407	TMEM43	transmembrane protein 43
269057	0.000238	1.29e-05	4.81299	2.75262	1.5979	LY6D	lymphocyte antigen 6 complex, locus D
476026	0.000299	1.73e-05	4.95994	2.75164	0.84039	CWC22	CWC22 homolog, spliceosome-associated protein
431099	0.000238	1.29e-05	4.80356	2.74472	0.94694	MYL6///SMARCC2///MYL6	myosin light chain 6///SWI/SNF related, matrix associated, actin dependent regulator of chromatin subfamily c member 2///myosin light chain 6
301048	0.00024	1.31e-05	-4.81777	2.74391	-1.16983	ICA1	islet cell autoantigen 1
343009	0.000239	1.3e-05	-4.80222	2.74021	-0.559943	LILRB4	leukocyte immunoglobulin like receptor B4
324027	0.000239	1.3e-05	-4.80217	2.74006	-0.622268	FOXE1	forkhead box E1
62037	0.000239	1.3e-05	4.80137	2.73733	1.18342	GAS5///CENPL///GAS5	growth arrest specific 5 (non-protein coding)///centromere protein L///growth arrest specific 5 (non-protein coding)
78095	0.000268	1.5e-05	-4.94736	2.73706	-0.95555	CCNT1	cyclin T1
148092	0.000288	1.65e-05	4.85517	2.73279	1.57174	USP15	ubiquitin specific peptidase 15
321096	0.000248	1.36e-05	4.83776	2.73079	0.810481	LYRM4	LYR motif containing 4
103091	0.000275	1.56e-05	4.83277	2.72989	1.24699	LOX	lysyl oxidase
347072	0.000242	1.32e-05	4.80602	2.72919	1.06653	APH1B	aph-1 homolog B, gamma-secretase subunit
187066	0.000241	1.32e-05	4.79797	2.72587	1.46984	CSRP1	cysteine and glycine rich protein 1
235103	0.000241	1.32e-05	4.79744	2.7241	0.967965	SECISBP2L	SECIS binding protein 2 like
291112	0.000249	1.37e-05	4.8355	2.72338	1.31431	EMCN	endomucin
123027	0.000243	1.33e-05	-4.80344	2.72055	-1.15713	CASP6	caspase 6
103016	0.000249	1.37e-05	-4.82521	2.71677	-1.37836	TRIM16///TRIM16L	tripartite motif containing 16///tripartite motif containing 16-like
450026	0.000264	1.47e-05	-4.88911	2.70895	-0.789103	DNM2	dynamin 2
142105	0.000246	1.35e-05	4.79956	2.70752	1.17602	STRAP	serine/threonine kinase receptor associated protein
345094	0.000251	1.38e-05	4.82194	2.70597	0.908575	LOC100129029	uncharacterized LOC100129029
424110	0.000246	1.35e-05	-4.79019	2.69961	-1.06714	ALDH6A1	aldehyde dehydrogenase 6 family member A1
425064	0.000328	1.95e-05	4.90072	2.69904	1.48645	FBXW7///PRH1-PRR4///PRR4	F-box and WD repeat domain containing 7///PRH1-PRR4 readthrough///proline rich 4 (lacrimal)
302080	0.000296	1.7e-05	4.89046	2.69374	0.694222	CRYGC	crystallin gamma C
418023	0.000248	1.36e-05	4.78795	2.69208	1.20663	NDUFV2	NADH:ubiquinone oxidoreductase core subunit V2
370005	0.00027	1.52e-05	4.82857	2.68918	0.889775	RPGRIP1	retinitis pigmentosa GTPase regulator interacting protein 1
66081	0.000372	2.27e-05	5.04927	2.67844	1.79015	DIAPH2-AS1	DIAPH2 antisense RNA 1
445109	0.000255	1.41e-05	-4.79743	2.67599	-1.56272	RAB27B	RAB27B, member RAS oncogene family
454010	0.000256	1.42e-05	4.79479	2.66719	2.04116	PTGIS	prostaglandin I2 (prostacyclin) synthase
355003	0.000256	1.42e-05	4.79459	2.6665	0.845579	NRBP1	nuclear receptor binding protein 1
431095	0.000255	1.4e-05	4.77951	2.66364	1.44436	PMEPA1	prostate transmembrane protein, androgen induced 1
268098	0.000272	1.53e-05	-4.86307	2.66054	-0.724397	RTF1	RTF1 homolog, Paf1/RNA polymerase II complex component
23109	0.000276	1.56e-05	4.81929	2.6592	0.717705	CEP95	centrosomal protein 95
372109	0.000256	1.41e-05	4.77748	2.6568	0.874517	TSHZ1	teashirt zinc finger homeobox 1
245108	0.000259	1.43e-05	4.79163	2.65663	0.782875	ZC3H7A	zinc finger CCCH-type containing 7A
269008	0.0003	1.74e-05	4.85272	2.65517	0.850437	FSTL1	follistatin like 1
176081	0.000256	1.42e-05	-4.77696	2.65502	-0.741483	LRRC41	leucine rich repeat containing 41
70051	0.000256	1.42e-05	4.77634	2.65296	0.779594	FTSJ1	FtsJ RNA methyltransferase homolog 1 (E. coli)
355069	0.000287	1.64e-05	-4.88671	2.64764	-1.71594	ADGRG2	adhesion G protein-coupled receptor G2
25025	0.000279	1.58e-05	4.77295	2.64752	1.66929	LILRB2	leukocyte immunoglobulin like receptor B2
179074	0.000257	1.43e-05	4.7747	2.64743	1.01905	C21orf59	chromosome 21 open reading frame 59
413080	0.000261	1.45e-05	4.77049	2.63325	1.21036	CEBPB	CCAAT/enhancer binding protein beta
330059	0.000261	1.45e-05	4.77044	2.63307	0.799094	GNAS	GNAS complex locus
99035	0.000262	1.46e-05	4.76912	2.62863	0.750422	CIR1	corepressor interacting with RBPJ, 1
24040	0.000292	1.68e-05	4.81002	2.62624	1.02635	SLC26A11	solute carrier family 26 member 11
423001	0.000317	1.87e-05	-5.00286	2.61655	-0.838081	PHC2	polyhomeotic homolog 2
54066	0.000381	2.34e-05	-5.10852	2.61428	-0.821816	POU5F1	POU class 5 homeobox 1
105068	0.000265	1.48e-05	4.7647	2.61375	0.644441	ARFGAP2	ADP ribosylation factor GTPase activating protein 2
232100	0.000317	1.86e-05	4.81671	2.61265	1.21419	TRAF3	TNF receptor associated factor 3
124086	0.00027	1.51e-05	4.78561	2.6117	0.89543	PTPDC1	protein tyrosine phosphatase domain containing 1
412062	0.000317	1.87e-05	4.97833	2.6116	1.68269	PMEPA1	prostate transmembrane protein, androgen induced 1
327067	0.000265	1.48e-05	4.76371	2.61044	0.958105	RRP36	ribosomal RNA processing 36
124071	0.00027	1.52e-05	4.78515	2.61017	1.37116	NCR3LG1	natural killer cell cytotoxicity receptor 3 ligand 1
98020	0.000274	1.54e-05	4.80083	2.60961	0.500891	RAB11FIP1	RAB11 family interacting protein 1
28073	0.000278	1.57e-05	-4.81779	2.60864	-1.40125	SCGN	secretagogin, EF-hand calcium binding protein
8081	0.000266	1.49e-05	4.76302	2.60811	0.844125	RBBP7	RB binding protein 7, chromatin remodeling factor
5069	0.000273	1.54e-05	-4.79135	2.60502	-0.877885	SEC16A	SEC16 homolog A, endoplasmic reticulum export factor
386045	0.000267	1.5e-05	4.76108	2.60158	1.3993	TRAF1	TNF receptor associated factor 1
60088	0.000271	1.52e-05	4.77464	2.6	0.940652	FAM135B	family with sequence similarity 135 member B
465056	0.000428	2.72e-05	-5.35579	2.59962	-1.04404	LOC105371622	uncharacterized LOC105371622
4077	0.000268	1.5e-05	4.7604	2.59928	1.20328	PPP1R12B	protein phosphatase 1 regulatory subunit 12B
96072	0.000285	1.62e-05	4.78616	2.58378	0.662954	FBXO33	F-box protein 33
366071	0.000276	1.56e-05	-4.77697	2.58307	-1.72387	FMO5	flavin containing monooxygenase 5
333085	0.000275	1.55e-05	4.76942	2.58263	0.775534	NSUN5	NOP2/Sun RNA methyltransferase family member 5
415073	0.000273	1.53e-05	-4.75412	2.57816	-0.820293	CTNNBL1	catenin beta like 1
313086	0.000273	1.54e-05	4.7534	2.57577	1.78996	ATPIF1	ATPase inhibitory factor 1
163003	0.000278	1.57e-05	4.77467	2.57546	1.39472	LACTB2	lactamase beta 2
144024	0.000278	1.58e-05	4.77392	2.57299	0.744317	TRMO	tRNA methyltransferase O
81066	0.000276	1.56e-05	4.74951	2.56267	0.750077	MUS81	MUS81 structure-specific endonuclease subunit
162095	0.00029	1.66e-05	-4.80152	2.55598	-0.974272	HOOK1	hook microtubule tethering protein 1
219103	0.000292	1.68e-05	-4.8099	2.55366	-0.647097	BARX2	BARX homeobox 2
441018	0.000278	1.58e-05	4.7462	2.55156	0.852256	TTPAL	alpha tocopherol transfer protein like
439058	0.000287	1.64e-05	4.75265	2.55013	1.74853	PCNA	proliferating cell nuclear antigen
487054	0.000321	1.9e-05	4.84012	2.54995	1.49554	ARRDC3	arrestin domain containing 3
380097	0.000313	1.83e-05	4.83639	2.54984	0.776334	C22orf31	chromosome 22 open reading frame 31
303096	0.000291	1.67e-05	4.76749	2.54908	1.1157	GEMIN2	gem nuclear organelle associated protein 2
67048	0.000279	1.58e-05	4.74482	2.54691	1.31169	RAB31///DENR	RAB31, member RAS oncogene family///density regulated re-initiation and release factor
388034	0.000282	1.6e-05	-4.74123	2.53487	-2.30536	HPGD	hydroxyprostaglandin dehydrogenase 15-(NAD)
466005	0.000282	1.61e-05	4.741	2.5341	1.41417	PMP22	peripheral myelin protein 22
156009	0.000283	1.61e-05	4.74045	2.53225	0.820476	PGRMC1///PGRMC1	progesterone receptor membrane component 1///progesterone receptor membrane component 1
481108	0.000286	1.63e-05	4.73697	2.52056	1.16201	PSMC1	proteasome 26S subunit, ATPase 1
181047	0.000286	1.63e-05	-4.73676	2.51983	-0.654481	BEST4	bestrophin 4
177019	0.000325	1.92e-05	4.80702	2.51885	1.79018	SLC39A8	solute carrier family 39 member 8
100098	0.000288	1.64e-05	4.74313	2.51855	0.870629	DYRK1A	dual specificity tyrosine phosphorylation regulated kinase 1A
132015	0.000306	1.78e-05	4.75798	2.51689	0.976694	DDX31	DEAD-box helicase 31
271035	0.000287	1.64e-05	4.73485	2.51342	1.33766	PKM	pyruvate kinase, muscle
411087	0.000353	2.14e-05	-4.95629	2.51136	-0.899858	DYNC1LI2	dynein cytoplasmic 1 light intermediate chain 2
499095	0.000317	1.86e-05	4.83109	2.51118	0.868919	NFASC	neurofascin
226056	0.000288	1.65e-05	-4.73388	2.51019	-0.549036	DEF8	differentially expressed in FDCP 8 homolog
60082	0.000341	2.05e-05	-4.94754	2.50935	-1.73437	OASL	2'-5'-oligoadenylate synthetase like
356015	0.000329	1.95e-05	4.80245	2.50455	0.910624	NHEJ1	non-homologous end joining factor 1
390079	0.000296	1.71e-05	-4.76072	2.50418	-1.01371	SRD5A3-AS1	SRD5A3 antisense RNA 1
374064	0.000307	1.79e-05	4.77817	2.50204	0.739372	LOC101929185///VEZF1	uncharacterized LOC101929185///vascular endothelial zinc finger 1
304075	0.000297	1.71e-05	-4.76005	2.50198	-0.848274	LOC407835///MAP2K2	mitogen-activated protein kinase kinase 2 pseudogene///mitogen-activated protein kinase kinase 2
372102	0.000299	1.73e-05	-4.76721	2.49954	-1.35316	SELENBP1	selenium binding protein 1
14086	0.000291	1.67e-05	4.73045	2.49866	1.08101	ERGIC3///CFTR	ERGIC and golgi 3///cystic fibrosis transmembrane conductance regulator
238031	0.000293	1.68e-05	4.72737	2.48833	1.09356	GIMAP4	GTPase, IMAP family member 4
94104	0.000294	1.69e-05	4.72559	2.48235	1.16202	UBE2A	ubiquitin conjugating enzyme E2 A
361092	0.000438	2.79e-05	-5.223	2.4775	-1.30075	LINC01018	long intergenic non-protein coding RNA 1018
249022	0.000297	1.71e-05	4.72243	2.47176	1.09344	KLF6	Kruppel like factor 6
256104	0.000318	1.87e-05	4.77702	2.46921	1.05605	TAF11	TATA-box binding protein associated factor 11
202013	0.000311	1.82e-05	4.77435	2.46816	0.794838	PHKG1	phosphorylase kinase catalytic subunit gamma 1
196051	0.000436	2.78e-05	-5.12643	2.46458	-0.916001	LOC441601	septin 7 pseudogene
103094	0.000299	1.73e-05	4.72029	2.46457	1.091	PRKDC	protein kinase, DNA-activated, catalytic polypeptide
235019	0.0003	1.74e-05	-4.72693	2.46444	-0.839587	KLC4	kinesin light chain 4
23081	0.000303	1.76e-05	4.73198	2.45816	0.861043	CEP57	centrosomal protein 57
136040	0.0003	1.74e-05	4.7182	2.45759	1.67576	ATP1B3	ATPase Na+/K+ transporting subunit beta 3
46096	0.0003	1.74e-05	4.71762	2.45564	1.23357	CLNS1A	chloride nucleotide-sensitive channel 1A
274008	0.0003	1.74e-05	4.71728	2.45451	0.915841	CD81	CD81 molecule
26020	0.000317	1.86e-05	4.77863	2.45324	0.780466	ATP2A1-AS1	ATP2A1 antisense RNA 1
78056	0.000301	1.75e-05	4.71607	2.45045	0.930756	TIMP2	TIMP metallopeptidase inhibitor 2
135074	0.000302	1.75e-05	4.71571	2.44924	0.860942	MLH3	mutL homolog 3
450019	0.000302	1.75e-05	4.71565	2.44903	0.798261	COL14A1	collagen type XIV alpha 1 chain
279074	0.000379	2.32e-05	-4.95349	2.44829	-0.766309	SLC35B3	solute carrier family 35 member B3
16095	0.000305	1.77e-05	4.72093	2.44444	0.979442	UBE2L6	ubiquitin conjugating enzyme E2 L6
151013	0.000303	1.76e-05	4.7142	2.44416	0.875124	PAIP2	poly(A) binding protein interacting protein 2
108092	0.000319	1.88e-05	-4.77545	2.44305	-0.776358	PERP	PERP, TP53 apoptosis effector
25049	0.000305	1.78e-05	4.71201	2.43684	0.696325	C1orf43	chromosome 1 open reading frame 43
238087	0.000306	1.78e-05	4.71115	2.43397	1.29349	NCF4	neutrophil cytosolic factor 4
22040	0.000321	1.89e-05	4.73999	2.43299	0.666071	ASH1L-AS1	ASH1L antisense RNA 1
368048	0.000319	1.88e-05	-4.76336	2.43272	-0.566647	PAK6	p21 (RAC1) activated kinase 6
11053	0.000412	2.59e-05	-5.07152	2.4314	-1.27446	RNF126	ring finger protein 126
437014	0.000307	1.79e-05	4.7094	2.4281	0.881159	BLOC1S2///BLOC1S2	biogenesis of lysosomal organelles complex 1 subunit 2///biogenesis of lysosomal organelles complex 1 subunit 2
195105	0.000308	1.8e-05	4.70859	2.42538	0.971043	ZCCHC14	zinc finger CCHC-type containing 14
224107	0.000308	1.8e-05	4.7083	2.4244	1.82694	RPL35	ribosomal protein L35
374091	0.00031	1.81e-05	4.70607	2.41695	0.877798	DNAJB11	DnaJ heat shock protein family (Hsp40) member B11
72093	0.000311	1.82e-05	4.70471	2.41241	1.0292	CDK5RAP1	CDK5 regulatory subunit associated protein 1
88058	0.000319	1.88e-05	4.70383	2.41118	1.6207	STX11	syntaxin 11
141077	0.000314	1.84e-05	4.71076	2.41053	1.15981	HLA-DRA	major histocompatibility complex, class II, DR alpha
261075	0.000388	2.39e-05	-4.89537	2.40903	-0.848651	STAM2	signal transducing adaptor molecule 2
279039	0.000476	3.11e-05	-5.08266	2.40612	-1.02868	VPS51	VPS51, GARP complex subunit
325005	0.000314	1.84e-05	4.70225	2.40417	0.811155	POLRMT	RNA polymerase mitochondrial
234068	0.000317	1.86e-05	-4.7072	2.39866	-1.09136	CRB3	crumbs 3, cell polarity complex component
185097	0.000317	1.86e-05	-4.70685	2.39751	-1.62517	GPX3	glutathione peroxidase 3
2054	0.000318	1.88e-05	4.71344	2.39667	1.04494	C19orf12	chromosome 19 open reading frame 12
392065	0.000317	1.86e-05	4.70651	2.39639	0.943632	FARP1	FERM, ARH/RhoGEF and pleckstrin domain protein 1
112053	0.000316	1.85e-05	4.69956	2.39516	0.856633	C1QTNF6	C1q and tumor necrosis factor related protein 6
140090	0.000331	1.97e-05	-4.74988	2.38923	-0.980161	ZNF207	zinc finger protein 207
142017	0.000317	1.87e-05	4.69775	2.38908	0.95121	AP2A2	adaptor related protein complex 2 alpha 2 subunit
56103	0.000367	2.24e-05	4.77426	2.38233	0.992366	POLR3E	RNA polymerase III subunit E
430049	0.000345	2.08e-05	-4.77023	2.36642	-0.89358	LOC283335	uncharacterized LOC283335
212053	0.000329	1.95e-05	-4.71136	2.36633	-0.917278	LOC102724532	uncharacterized LOC102724532
101112	0.000323	1.91e-05	4.69084	2.36598	1.15163	NR1H3	nuclear receptor subfamily 1 group H member 3
53023	0.000327	1.94e-05	4.70363	2.36415	1.28044	ARHGAP15	Rho GTPase activating protein 15
457105	0.000325	1.93e-05	4.68861	2.35852	0.780766	CASC3	cancer susceptibility candidate 3
157106	0.000335	2.01e-05	-4.72292	2.35498	-0.754133	PDX1	pancreatic and duodenal homeobox 1
29111	0.00042	2.65e-05	4.7827	2.3545	0.799944	LINC00648	long intergenic non-protein coding RNA 648
415066	0.000327	1.94e-05	4.68686	2.35267	1.16796	TMEM47	transmembrane protein 47
236082	0.000374	2.29e-05	-4.81327	2.34618	-0.613333	CDK11A///CDK11B	cyclin dependent kinase 11A///cyclin dependent kinase 11B
404025	0.000334	1.99e-05	4.68701	2.3315	1.14177	MXRA8///MXRA8	matrix remodeling associated 8///matrix remodeling associated 8
457080	0.000333	1.98e-05	4.68024	2.33057	0.846099	ARAP1	ArfGAP with RhoGAP domain, ankyrin repeat and PH domain 1
115056	0.000333	1.98e-05	4.6802	2.33042	0.985661	PRRT3-AS1	PRRT3 antisense RNA 1
2004	0.00036	2.19e-05	4.7077	2.327	0.781897	LINC01572	long intergenic non-protein coding RNA 1572
378100	0.000377	2.31e-05	4.72544	2.32642	0.703368	AK9	adenylate kinase 9
411004	0.000334	1.99e-05	4.67861	2.32511	0.748534	IFT46	intraflagellar transport 46
147109	0.000334	2e-05	4.67838	2.32434	1.66385	NAMPT	nicotinamide phosphoribosyltransferase
76104	0.000334	2e-05	4.67833	2.32418	1.3255	EIF4EBP2	eukaryotic translation initiation factor 4E binding protein 2
22002	0.000336	2.01e-05	4.68454	2.32327	1.31963	RCN2	reticulocalbin 2
478112	0.000345	2.08e-05	4.67519	2.31601	1.26455	IFI44	interferon induced protein 44
424012	0.000337	2.02e-05	4.67471	2.31209	1.66406	IGSF6///LIMD2	immunoglobulin superfamily member 6///LIM domain containing 2
355065	0.000584	4.02e-05	-5.41721	2.31194	-1.04628	PTPA	protein phosphatase 2 phosphatase activator
410046	0.000345	2.07e-05	4.69349	2.30751	0.678153	MRI1	methylthioribose-1-phosphate isomerase 1
411040	0.00034	2.04e-05	4.67219	2.30367	1.13947	RAB34	RAB34, member RAS oncogene family
163059	0.000341	2.05e-05	4.67118	2.30029	1.09581	NAA20	N(alpha)-acetyltransferase 20, NatB catalytic subunit
151055	0.000341	2.05e-05	4.67071	2.29873	0.811483	RNF220	ring finger protein 220
268073	0.000383	2.36e-05	4.70737	2.29855	1.02541	GEMIN8	gem nuclear organelle associated protein 8
189067	0.000384	2.37e-05	4.70611	2.29455	1.20633	DLL1	delta like canonical Notch ligand 1
247109	0.000343	2.06e-05	4.66902	2.29309	0.980293	ZCCHC14	zinc finger CCHC-type containing 14
56085	0.000347	2.09e-05	-4.68194	2.29241	-0.837999	CDK9	cyclin dependent kinase 9
144054	0.000396	2.46e-05	-4.77416	2.28562	-0.629385	SLC44A2	solute carrier family 44 member 2
188092	0.000347	2.09e-05	-4.6728	2.28425	-1.19295	U2AF1	U2 small nuclear RNA auxiliary factor 1
140103	0.000504	3.35e-05	-5.05317	2.28206	-0.895831	SLC20A2	solute carrier family 20 member 2
292085	0.000348	2.1e-05	4.66319	2.27362	0.960953	RMND1	required for meiotic nuclear division 1 homolog
314015	0.000396	2.47e-05	-4.78919	2.27318	-0.617109	ZBED4	zinc finger BED-type containing 4
330060	0.000349	2.11e-05	-4.66252	2.2714	-0.811631	SEC61G	Sec61 translocon gamma subunit
412110	0.00035	2.12e-05	4.66102	2.26641	1.23135	SLC25A33	solute carrier family 25 member 33
100061	0.00035	2.12e-05	-4.66045	2.26448	-0.729648	MBD5	methyl-CpG binding domain protein 5
73032	0.000351	2.13e-05	4.6594	2.26098	1.00131	CNPY2	canopy FGF signaling regulator 2
481053	0.00036	2.19e-05	4.67766	2.25545	1.51142	INMT	indolethylamine N-methyltransferase
392022	0.00036	2.19e-05	4.65993	2.24155	1.13399	KPNB1	karyopherin subunit beta 1
393048	0.000359	2.18e-05	4.65277	2.23889	0.944738	HLA-G	major histocompatibility complex, class I, G
266112	0.000363	2.21e-05	4.65762	2.23388	0.745541	BCL2L11	BCL2 like 11
345110	0.000445	2.86e-05	4.72652	2.22731	0.78673	SNCB	synuclein beta
98071	0.000365	2.22e-05	4.6553	2.22619	0.802668	OSTM1	osteopetrosis associated transmembrane protein 1
186104	0.000391	2.42e-05	4.69914	2.22036	0.936077	SPOCK1	sparc/osteonectin, cwcv and kazal-like domains proteoglycan (testican) 1
103090	0.000366	2.23e-05	4.6466	2.21835	1.05281	IGSF3	immunoglobulin superfamily member 3
414093	0.000366	2.23e-05	4.64631	2.21736	1.21511	IFITM4P	interferon induced transmembrane protein 4 pseudogene
495019	0.000406	2.54e-05	-4.76395	2.21501	-0.866564	NKAP	NFKB activating protein
501015	0.000368	2.24e-05	4.64475	2.21217	1.44215	EXOSC8	exosome component 8
448012	0.000368	2.25e-05	-4.64403	2.20979	-0.810287	UQCC3	ubiquinol-cytochrome c reductase complex assembly factor 3
133095	0.000369	2.25e-05	4.6435	2.20802	0.765338	RNF187	ring finger protein 187
473008	0.000371	2.27e-05	-4.64152	2.20143	-1.04027	ACSS3	acyl-CoA synthetase short-chain family member 3
18059	0.000407	2.55e-05	-4.7474	2.19859	-0.57026	EXTL3	exostosin like glycosyltransferase 3
19020	0.00038	2.33e-05	4.65915	2.19466	0.84272	CDSN	corneodesmosin
457057	0.000613	4.26e-05	-5.22943	2.19454	-1.04796	FLJ37035	uncharacterized LOC399821
438103	0.000402	2.51e-05	-4.72475	2.19265	-0.963024	TSPAN15	tetraspanin 15
93018	0.000383	2.36e-05	4.66541	2.19198	0.760666	KIF13B	kinesin family member 13B
317036	0.000375	2.29e-05	-4.63842	2.19109	-0.832465	KRT75	keratin 75
291020	0.000375	2.29e-05	4.6383	2.19072	1.31225	PLEKHO2	pleckstrin homology domain containing O2
485094	0.000386	2.38e-05	4.67215	2.18988	0.858058	LOC339192	uncharacterized LOC339192
161099	0.000375	2.3e-05	4.6376	2.18838	1.01594	BNIP3L	BCL2 interacting protein 3 like
342001	0.00038	2.33e-05	4.65018	2.18757	0.747576	MAN2A2	mannosidase alpha class 2A member 2
174065	0.000412	2.59e-05	4.68989	2.18676	1.29127	PGBD1	piggyBac transposable element derived 1
145083	0.000386	2.38e-05	4.63595	2.18599	1.73521	TXN	thioredoxin
187030	0.000381	2.34e-05	4.64887	2.18325	0.94503	CD99	CD99 molecule
258073	0.00066	4.68e-05	-5.26046	2.17796	-1.69182	GPAT4	glycerol-3-phosphate acyltransferase 4
446066	0.000379	2.32e-05	4.63429	2.17734	1.90811	PTGDS	prostaglandin D2 synthase
472012	0.000381	2.33e-05	4.63286	2.17259	1.17321	ANP32B	acidic nuclear phosphoprotein 32 family member B
470094	0.000381	2.34e-05	4.63276	2.17225	0.991742	TCOF1	treacle ribosome biogenesis factor 1
448061	0.000514	3.43e-05	-4.96594	2.16846	-0.839624	DGKZ	diacylglycerol kinase zeta
374070	0.000446	2.87e-05	4.68381	2.1649	1.24469	SC5D	sterol-C5-desaturase
140096	0.000396	2.47e-05	4.64263	2.16381	0.913738	DCUN1D3	defective in cullin neddylation 1 domain containing 3
143057	0.000393	2.43e-05	-4.65604	2.16138	-0.784535	SLC4A4	solute carrier family 4 member 4
404105	0.000403	2.52e-05	4.68713	2.16074	0.739087	LOC105377146	uncharacterized LOC105377146
118025	0.000388	2.39e-05	-4.6344	2.15695	-1.2597	VILL	villin like
184074	0.000388	2.39e-05	4.62575	2.14895	0.924076	SENP5	SUMO1/sentrin specific peptidase 5
319069	0.000424	2.68e-05	-4.70432	2.14877	-0.89295	SUPT20H	SPT20 homolog, SAGA complex component
320073	0.000389	2.4e-05	4.62524	2.14726	0.799631	ZDHHC11	zinc finger DHHC-type containing 11
315004	0.000389	2.4e-05	-4.62472	2.14551	-0.775138	STX17	syntaxin 17
471024	0.000391	2.42e-05	-4.63093	2.14545	-0.740674	SPERT	spermatid associated
242062	0.000389	2.4e-05	4.62431	2.14415	1.03412	CTSA	cathepsin A
154067	0.000389	2.41e-05	4.62415	2.14362	1.04403	C1orf115	chromosome 1 open reading frame 115
100017	0.00039	2.41e-05	4.624	2.14314	1.16041	GPX7	glutathione peroxidase 7
412040	0.00039	2.41e-05	4.62379	2.14243	0.820048	PSMB5///KRT8	proteasome subunit beta 5///keratin 8
397112	0.00039	2.41e-05	4.62314	2.14026	0.732135	DDX23	DEAD-box helicase 23
261026	0.000393	2.44e-05	-4.62842	2.13715	-0.893363	EPOR	erythropoietin receptor
22016	0.000393	2.43e-05	4.62075	2.13232	0.748841	ZNF266	zinc finger protein 266
59079	0.000393	2.44e-05	4.62055	2.13168	0.731808	DNAJB12	DnaJ heat shock protein family (Hsp40) member B12
339099	0.000393	2.44e-05	-4.62042	2.13125	-0.573538	TOP1P2///TOP1	topoisomerase (DNA) I pseudogene 2///topoisomerase (DNA) I
454108	0.000441	2.83e-05	4.66356	2.13113	1.64668	STAC	SH3 and cysteine rich domain
495032	0.00041	2.58e-05	4.66874	2.12851	0.773466	ZFYVE19	zinc finger FYVE-type containing 19
80098	0.000395	2.45e-05	4.61847	2.12476	0.888318	TRAPPC13	trafficking protein particle complex 13
137059	0.000396	2.46e-05	4.61774	2.12235	1.16654	SPSB2	splA/ryanodine receptor domain and SOCS box containing 2
280109	0.000396	2.46e-05	4.61744	2.12133	0.858903	TELO2	telomere maintenance 2
472054	0.000398	2.48e-05	4.61522	2.11397	1.14171	ADAMTS5	ADAM metallopeptidase with thrombospondin type 1 motif 5
6029	0.00041	2.58e-05	4.64838	2.11279	0.838935	HERC4	HECT and RLD domain containing E3 ubiquitin protein ligase 4
60057	0.000399	2.49e-05	-4.61456	2.11177	-0.881662	BZW1	basic leucine zipper and W2 domains 1
395055	0.00042	2.65e-05	4.64062	2.11031	0.631834	ZNF414	zinc finger protein 414
82002	0.000425	2.69e-05	4.65582	2.10898	0.861819	ZBTB44	zinc finger and BTB domain containing 44
451046	0.000529	3.55e-05	-4.88774	2.10734	-0.810916	LIG4	DNA ligase 4
118087	0.000413	2.6e-05	-4.6463	2.10605	-0.742834	PGPEP1	pyroglutamyl-peptidase I
120066	0.000403	2.52e-05	4.61127	2.10085	0.66281	THOC5	THO complex 5
286048	0.000545	3.69e-05	4.61749	2.09862	1.94837	ANGPT2	angiopoietin 2
205104	0.000436	2.78e-05	4.63571	2.09526	0.973352	TYK2	tyrosine kinase 2
79100	0.000444	2.85e-05	4.68551	2.09017	0.706655	CST8	cystatin 8
315018	0.000409	2.57e-05	4.61365	2.08834	0.61638	ZFYVE1	zinc finger FYVE-type containing 1
103104	0.000408	2.55e-05	4.60684	2.08613	1.01135	IFRD1	interferon related developmental regulator 1
109063	0.000536	3.61e-05	4.65234	2.08559	1.11477	ATP5S	ATP synthase, H+ transporting, mitochondrial Fo complex subunit s (factor B)
121013	0.000408	2.56e-05	4.60622	2.08408	0.684013	PANK4	pantothenate kinase 4
303087	0.000409	2.56e-05	4.60571	2.08239	1.12614	FLJ11710	uncharacterized protein FLJ11710
271009	0.000409	2.56e-05	4.60563	2.08212	1.11071	TMEM41A	transmembrane protein 41A
9075	0.00041	2.57e-05	4.60486	2.07957	1.10671	ETS1	ETS proto-oncogene 1, transcription factor
374017	0.000423	2.67e-05	-4.63759	2.07786	-0.902006	HOXD10	homeobox D10
150036	0.000449	2.89e-05	-4.68144	2.07748	-0.668111	ERCC4	ERCC excision repair 4, endonuclease catalytic subunit
184080	0.000413	2.6e-05	4.60142	2.06815	0.833022	CCT7	chaperonin containing TCP1 subunit 7
374103	0.000415	2.61e-05	-4.6002	2.06412	-1.06361	IL17RE	interleukin 17 receptor E
32107	0.000425	2.69e-05	4.62612	2.06394	0.70885	LOC105371899	uncharacterized LOC105371899
137078	0.000464	3e-05	-4.69636	2.06056	-0.996847	ZNF626///ZNF626	zinc finger protein 626///zinc finger protein 626
376051	0.000427	2.71e-05	4.6244	2.05835	1.05805	AMOT	angiomotin
114002	0.000488	3.21e-05	-4.77557	2.05656	-0.945143	FAM3A	family with sequence similarity 3 member A
240069	0.000419	2.64e-05	-4.5967	2.0525	-1.2591	ARG2///VTI1B	arginase 2///vesicle transport through interaction with t-SNAREs 1B
394029	0.000424	2.68e-05	4.60901	2.05206	0.685373	AGVR6190	uncharacterized LOC643797
170111	0.00042	2.65e-05	4.59603	2.0503	0.76745	CHERP///CHERP	calcium homeostasis endoplasmic reticulum protein///calcium homeostasis endoplasmic reticulum protein
25013	0.000425	2.69e-05	4.60799	2.04871	0.920911	RBM41	RNA binding motif protein 41
431031	0.000424	2.68e-05	4.60058	2.04517	1.01436	GATA2	GATA binding protein 2
271097	0.000477	3.12e-05	-4.71376	2.04514	-1.18974	TSPAN5	tetraspanin 5
396038	0.00043	2.74e-05	-4.61193	2.04008	-1.01447	EGLN3	egl-9 family hypoxia inducible factor 3
99104	0.000424	2.68e-05	-4.59239	2.03822	-0.866463	POLD4///POLD4	DNA polymerase delta 4, accessory subunit///DNA polymerase delta 4, accessory subunit
280101	0.000425	2.7e-05	4.59116	2.03413	1.25981	PLEKHO1	pleckstrin homology domain containing O1
360027	0.000435	2.77e-05	-4.61694	2.0341	-0.73683	SDHAF4	succinate dehydrogenase complex assembly factor 4
4104	0.000425	2.7e-05	4.59106	2.0338	1.71443	ALOX5AP///CCL4	arachidonate 5-lipoxygenase activating protein///C-C motif chemokine ligand 4
162080	0.000428	2.71e-05	-4.58917	2.02755	-0.934261	BSG	basigin (Ok blood group)
69092	0.000439	2.8e-05	4.58793	2.02753	1.82432	MGC24103	uncharacterized MGC24103
224060	0.000502	3.33e-05	-4.72601	2.02705	-0.759438	EFCAB3///HILPDA	EF-hand calcium binding domain 3///hypoxia inducible lipid droplet associated
80084	0.000428	2.72e-05	4.58874	2.02612	0.685725	HPS3	HPS3, biogenesis of lysosomal organelles complex 2 subunit 1
307111	0.000457	2.95e-05	4.62854	2.02183	0.795302	MEF2C-AS1	MEF2C antisense RNA 1
290050	0.000474	3.09e-05	4.63624	2.01759	0.568972	LOC100506476	uncharacterized LOC100506476
72001	0.000432	2.75e-05	4.58552	2.01546	2.12592	SERPINA1///RPL35	serpin family A member 1///ribosomal protein L35
400058	0.000439	2.8e-05	-4.58805	2.00384	-0.561045	STK39	serine/threonine kinase 39
402012	0.000441	2.82e-05	4.58573	1.99621	1.11673	TTC32	tetratricopeptide repeat domain 32
435048	0.000453	2.92e-05	-4.61146	1.99337	-1.00413	PREP	prolyl endopeptidase
270026	0.00044	2.81e-05	-4.57865	1.99272	-0.744946	SYNJ2BP	synaptojanin 2 binding protein
214105	0.000452	2.91e-05	4.57662	1.99031	1.07528	WBSCR22	Williams-Beuren syndrome chromosome region 22
387018	0.000441	2.82e-05	4.57779	1.98986	1.44122	EPHA2	EPH receptor A2
325092	0.000453	2.92e-05	4.60193	1.98535	0.645471	TFPT	TCF3 fusion partner
480110	0.000474	3.09e-05	4.62478	1.98404	1.00325	TMEM132A	transmembrane protein 132A
108111	0.000446	2.86e-05	4.57396	1.97718	0.842538	SAT2	spermidine/spermine N1-acetyltransferase family member 2
154004	0.000472	3.07e-05	-4.62717	1.97007	-0.959532	GPRC5C	G protein-coupled receptor class C group 5 member C
95095	0.000559	3.81e-05	4.66523	1.96903	0.798959	GPATCH1	G-patch domain containing 1
356107	0.000449	2.88e-05	4.57137	1.96861	0.86957	ALG9	ALG9, alpha-1,2-mannosyltransferase
88005	0.000488	3.2e-05	4.63665	1.96695	0.53361	ZMYND10	zinc finger MYND-type containing 10
[truncated: 23,553 more rows]
